# Supplementary material for: Material discovery of secondary and natural cementitious precursors
Source: Research Square preprint supplement (doi:10.21203/rs.3.rs-5342559/v1), 2024-11-04
Supplement: Supplementary file 1 [file c7a8ced0796a612b4aa46a57.xlsx]

## Sheet: heat_ch
Material name	SiO2	Al2O3	Fe2O3	CaO	MgO	SO3	TiO2	MnO	K2O	Na2O	LOI	Specific gravity (1)	Amorphous content (%)	d50 (?m)	SCM (g)	Ca(OH)2 (g)	CaCO3 (g)	Water (g)	K2SO4 (g)	KOH (g)	curing temp	age (days)	heat release J/g	CH consumption g/100 g	Bound water g/100g	DOI
limestone LS	0.06	0.04	0.1	52.45	0.8	0.14			0.12	0.13	42.58				11.11	33.33	5.56	60	1.2	0.24	40	7		9.9		10.1002/cepa.2960
limestone LS	0.06	0.04	0.1	52.45	0.8	0.14			0.12	0.13	42.58				11.11	33.33	5.56	60	1.2	0.24	40	28		9.9		10.1002/cepa.2960
brick powder BPW	60.63	13.62	4.52	8.31	2.43	2.19	0.69	0.04	2.61	0.43	4.16		23.2		11.11	33.33	5.56	60	1.2	0.24	40	7		53		10.1002/cepa.2960
brick powder BPW	60.63	13.62	4.52	8.31	2.43	2.19	0.69	0.04	2.61	0.43	4.16		23.2		11.11	33.33	5.56	60	1.2	0.24	40	28		58.8		10.1002/cepa.2960
fly ash FA	47.8	26.59	9.14	3.56	2.23	0.77	1.08	0.11	3.41	1.36	2.4		79.7		11.11	33.33	5.56	60	1.2	0.24	40	7		59		10.1002/cepa.2960
brick powder BPU	53.74	15.88	5.97	7.78	4.69	0.1	0.69	0.08	3.14	0.84	7.09		37.8		11.11	33.33	5.56	60	1.2	0.24	40	7		61.6		10.1002/cepa.2960
brick powder BPU	53.74	15.88	5.97	7.78	4.69	0.1	0.69	0.08	3.14	0.84	7.09		37.8		11.11	33.33	5.56	60	1.2	0.24	40	28		61.8		10.1002/cepa.2960
brick powder BPN	58.01	18.22	7.08	5.49	3.05	0.05	0.77	0.1	3.37	1.03	1.77		39.3		11.11	33.33	5.56	60	1.2	0.24	40	7		78		10.1002/cepa.2960
brick powder BPN	58.01	18.22	7.08	5.49	3.05	0.05	0.77	0.1	3.37	1.03	1.77		39.3		11.11	33.33	5.56	60	1.2	0.24	40	28		78		10.1002/cepa.2960
fly ash FA	47.8	26.59	9.14	3.56	2.23	0.77	1.08	0.11	3.41	1.36	2.4		79.7		11.11	33.33	5.56	60	1.2	0.24	40	28		94.5		10.1002/cepa.2960
brick powder BPN	58.01	18.22	7.08	5.49	3.05	0.05	0.77	0.1	3.37	1.03	1.77		39.3		11.11	33.33	5.56	60	1.2	0.24	40	3	81.2			10.1002/cepa.2960
brick powder BPU	53.74	15.88	5.97	7.78	4.69	0.1	0.69	0.08	3.14	0.84	7.09		37.8		11.11	33.33	5.56	60	1.2	0.24	40	3	74.9			10.1002/cepa.2960
brick powder BPW	60.63	13.62	4.52	8.31	2.43	2.19	0.69	0.04	2.61	0.43	4.16		23.2		11.11	33.33	5.56	60	1.2	0.24	40	3	67.7			10.1002/cepa.2960
fly ash FA	47.8	26.59	9.14	3.56	2.23	0.77	1.08	0.11	3.41	1.36	2.4		79.7		11.11	33.33	5.56	60	1.2	0.24	40	3	145.8			10.1002/cepa.2960
limestone LS	0.06	0.04	0.1	52.45	0.8	0.14			0.12	0.13	42.58				11.11	33.33	5.56	60	1.2	0.24	40	3	9.8			10.1002/cepa.2960
brick powder BPN	58.01	18.22	7.08	5.49	3.05	0.05	0.77	0.1	3.37	1.03	1.77		39.3		11.11	33.33	5.56	60	1.2	0.24	40	7	138.2			10.1002/cepa.2960
brick powder BPU	53.74	15.88	5.97	7.78	4.69	0.1	0.69	0.08	3.14	0.84	7.09		37.8		11.11	33.33	5.56	60	1.2	0.24	40	7	105.4			10.1002/cepa.2960
brick powder BPW	60.63	13.62	4.52	8.31	2.43	2.19	0.69	0.04	2.61	0.43	4.16		23.2		11.11	33.33	5.56	60	1.2	0.24	40	7	129.8			10.1002/cepa.2960
fly ash FA	47.8	26.59	9.14	3.56	2.23	0.77	1.08	0.11	3.41	1.36	2.4		79.7		11.11	33.33	5.56	60	1.2	0.24	40	7	235.4			10.1002/cepa.2960
limestone LS	0.06	0.04	0.1	52.45	0.8	0.14			0.12	0.13	42.58				11.11	33.33	5.56	60	1.2	0.24	40	7	10.3			10.1002/cepa.2960
limestone powder	0.66	0.24	0.1	55.44	0.77	0.13	0.02		0.06	0	42.49			13.7	10	30	0	36	0	1.51	50	10		-4.9		10.1016/j.cemconcomp.2017.07.009
ground granulated blast furnace slag 1	32.59	13.94	0.78	42.22	4.96	2.02	0.58		0.37	0.23	2.08			13.7	10	30	0	36	0	1.51	50	10		23.0279		10.1016/j.cemconcomp.2017.07.009
ground granulated blast furnace slag 4	37.71	8.23	0.74	39.08	10.89	1.07	0.33		0.43	0.25	0.75			11.8	10	30	0	36	0	1.51	50	10		24.6215		10.1016/j.cemconcomp.2017.07.009
ground granulated blast furnace slag 2	34.56	10.46	0.7	39.13	10.68	1.11	0.48		0.44	0.31	1.79			10.2	10	30	0	36	0	1.51	50	10		38.1673		10.1016/j.cemconcomp.2017.07.009
ground granulated blast furnace slag 3	41.01	9.26	0.66	39.73	12.19	1.05	0.36		0.43	0.3				12.7	10	30	0	36	0	1.51	50	10		39.761		10.1016/j.cemconcomp.2017.07.009
quartz powder	99.4	0.35	0.02	0.03	0	0	0		0.01	0	3.5			3.5	10	30	0	36	0	1.51	50	10		45.9		10.1016/j.cemconcomp.2017.07.009
fly ash 4	56.76	20.51	6.21	9.74	2.59	0.46	1.17		1.35	0.69	0.37			14.6	10	30	0	36	0	1.51	50	10		55.6972		10.1016/j.cemconcomp.2017.07.009
fly ash 1	55.7	23.71	3.75	10.5	1	0.25	0.71		0.81	2.46	0.94			27.2	10	30	0	36	0	1.51	50	10		60.4781		10.1016/j.cemconcomp.2017.07.009
fly ash 3	35.48	18.36	5.27	20.38	4.09	2.73	1.11		0.81	6.69	4.53			12.4	10	30	0	36	0	1.51	50	10		62.0717		10.1016/j.cemconcomp.2017.07.009
fly ash 2	41.62	21.3	8.14	17.13	2.84	1.59	1.28		1.49	1.01	3.01			19.2	10	30	0	36	0	1.51	50	10		67.6494		10.1016/j.cemconcomp.2017.07.009
calcined clay	61.82	27.78	3.35	0.33	0.38	0.11	0.39		3.27	0.22	2.23			24	10	30	0	36	0	1.51	50	10		80.3984		10.1016/j.cemconcomp.2017.07.009
silica fume	91.47	0.88	1.8	1.06	2.43	0.25	0.01		0.76	0.29					10	30	0	36	0	1.51	50	10		103.506		10.1016/j.cemconcomp.2017.07.009
calcined clay	51.92	43.1	1.52	0.14	0.15	0.11	2.01		0.23	0.05	0.58			12.5	10	30	0	36	0	1.51	50	10		130.598		10.1016/j.cemconcomp.2017.07.009
silica fume	93.47	0	0	0	0	0	0		0	0					10	30	0	36	0	1.51	50	10		175.219		10.1016/j.cemconcomp.2017.07.009
fly ash 1	55.7	23.71	3.75	10.5	1	0.25	0.71		0.81	2.46	0.94			27.2	10	30	0	36	0	1.51	50	10	320			10.1016/j.cemconcomp.2017.07.009
fly ash 2	41.62	21.3	8.14	17.13	2.84	1.59	1.28		1.49	1.01	3.01			19.2	10	30	0	36	0	1.51	50	10	349.6			10.1016/j.cemconcomp.2017.07.009
fly ash 3	35.48	18.36	5.27	20.38	4.09	2.73	1.11		0.81	6.69	4.53			12.4	10	30	0	36	0	1.51	50	10	320			10.1016/j.cemconcomp.2017.07.009
fly ash 4	56.76	20.51	6.21	9.74	2.59	0.46	1.17		1.35	0.69	0.37			14.6	10	30	0	36	0	1.51	50	10	302.2			10.1016/j.cemconcomp.2017.07.009
ground granulated blast furnace slag 1	32.59	13.94	0.78	42.22	4.96	2.02	0.58		0.37	0.23	2.08			13.7	10	30	0	36	0	1.51	50	10	444.4			10.1016/j.cemconcomp.2017.07.009
ground granulated blast furnace slag 2	34.56	10.46	0.7	39.13	10.68	1.11	0.48		0.44	0.31	1.79			10.2	10	30	0	36	0	1.51	50	10	426.7			10.1016/j.cemconcomp.2017.07.009
ground granulated blast furnace slag 3	41.01	9.26	0.66	39.73	12.19	1.05	0.36		0.43	0.3				12.7	10	30	0	36	0	1.51	50	10	385.2			10.1016/j.cemconcomp.2017.07.009
ground granulated blast furnace slag 4	37.71	8.23	0.74	39.08	10.89	1.07	0.33		0.43	0.25	0.75			11.8	10	30	0	36	0	1.51	50	10	373.3			10.1016/j.cemconcomp.2017.07.009
calcined clay	51.92	43.1	1.52	0.14	0.15	0.11	2.01		0.23	0.05	0.58			12.5	10	30	0	36	0	1.51	50	10	711.1			10.1016/j.cemconcomp.2017.07.009
calcined clay	61.82	27.78	3.35	0.33	0.38	0.11	0.39		3.27	0.22	2.23			24	10	30	0	36	0	1.51	50	10	361.5			10.1016/j.cemconcomp.2017.07.009
silica fume	91.47	0.88	1.8	1.06	2.43	0.25	0.01		0.76	0.29					10	30	0	36	0	1.51	50	10	391.1			10.1016/j.cemconcomp.2017.07.009
silica fume	93.47	0	0	0	0	0	0		0	0					10	30	0	36	0	1.51	50	10	598.5			10.1016/j.cemconcomp.2017.07.009
quartz powder	99.4	0.35	0.02	0.03	0	0	0		0.01	0	3.5			3.5	10	30	0	36	0	1.51	50	10	82.3			10.1016/j.cemconcomp.2017.07.009
limestone powder	0.66	0.24	0.1	55.44	0.77	0.13	0.02		0.06	0	42.49			13.7	10	30	0	36	0	1.51	50	10	21.4			10.1016/j.cemconcomp.2017.07.009
limestone powder	0.66	0.24	0.1	55.44	0.77	0.13			0.06	0					10	30	0	36	0	1.51	50	10		0.266667		10.1016/j.cemconcomp.2019.05.017
municipal solid waste incineration fly ash	3.79	1.08	4.53	55.86	3.39	8.56			7.63	5.75					10	30	0	36	0	1.51	50	10		0.533333		10.1016/j.cemconcomp.2019.05.017
basic oxygen gurnace slag	16.15	4.31	27.03	41.03	3.64	0.16			0.17	0.2					10	30	0	36	0	1.51	50	10		4.8		10.1016/j.cemconcomp.2019.05.017
basalt fines	44.88	15.34	13.98	10.49	6.01				0.21	2.4					10	30	0	36	0	1.51	50	10		13.3333		10.1016/j.cemconcomp.2019.05.017
harvested landfilled fly ash Dave Johnson DJ1	37.05	17.52	5.49	25.26	4	1.28			0.46	0.86	4.84	2.78		19.34	10	30	0	36	0	1.51	50	10		32.7766		10.1016/j.cemconcomp.2019.05.017
harvested landfilled fly ash Dave Johnson DJ2	37.1	14.91	4.77	21.33	3.39	2.2			0.52	0.73	12.52	2.47		45.84	10	30	0	36	0	1.51	50	10		35.6994		10.1016/j.cemconcomp.2019.05.017
quartz powder	99.4	0.35	0.02	0.03					0.01						10	30	0	36	0	1.51	50	10		46.1333		10.1016/j.cemconcomp.2019.05.017
fly ash	54.24	18.16	10.42	7.37	1.46	1.3			2.71	1.24	1.13	2.39		16.34	10	30	0	36	0	1.51	50	10		48.4342		10.1016/j.cemconcomp.2019.05.017
harvested landfilled fly ash Jim Bridger JB12	37.47	17.55	5.48	25.09	3.98	1.31			0.45	0.91	4.71	2.36		20.85	10	30	0	36	0	1.51	50	10		55.1148		10.1016/j.cemconcomp.2019.05.017
harvested landfilled fly ash Jim Bridger JB1	65.55	15.17	5.18	5.76	1.86	0.47			1.12	1.36	1.54	2.33		51.52	10	30	0	36	0	1.51	50	10		57.2025		10.1016/j.cemconcomp.2019.05.017
ground lightweight aggregate inert GLWA	62.41	18.73	8.26	2.18	2.48	0.55			3.59	2.11					10	30	0	36	0	1.51	50	10		62.1333		10.1016/j.cemconcomp.2019.05.017
ground glass	72	1		5	4					13					10	30	0	36	0	1.51	50	10		67.4667		10.1016/j.cemconcomp.2019.05.017
harvested landfilled fly ash Nucla	50.3	23.61	2.76	11.46	0.93	4.4			0.9	0.47	2.5	2.56		32.75	10	30	0	36	0	1.51	50	10		76.4092		10.1016/j.cemconcomp.2019.05.017
ground pumice	76.2	13.5	1.1	0.8	0.05				1.8	1.6					10	30	0	36	0	1.51	50	10		98.4		10.1016/j.cemconcomp.2019.05.017
ordinary portland concrete	19.24	3.8	2.75	59.05	1.5	2.49			0.6	0.17	9.9	3.15		15	10	30	0	36	0	1.51	50	10				10.1016/j.cemconcomp.2019.05.017
fly ash	54.24	18.16	10.42	7.37	1.46	1.3			2.71	1.24	1.13	2.39		16.34	10	30	0	36	0	1.51	50	10	286.192			10.1016/j.cemconcomp.2019.05.017
harvested landfilled fly ash Dave Johnson DJ1	37.05	17.52	5.49	25.26	4	1.28			0.46	0.86	4.84	2.78		19.34	10	30	0	36	0	1.51	50	10	256.067			10.1016/j.cemconcomp.2019.05.017
harvested landfilled fly ash Dave Johnson DJ2	37.1	14.91	4.77	21.33	3.39	2.2			0.52	0.73	12.52	2.47		45.84	10	30	0	36	0	1.51	50	10	124.686			10.1016/j.cemconcomp.2019.05.017
harvested landfilled fly ash Jim Bridger JB1	65.55	15.17	5.18	5.76	1.86	0.47			1.12	1.36	1.54	2.33		51.52	10	30	0	36	0	1.51	50	10	246.862			10.1016/j.cemconcomp.2019.05.017
harvested landfilled fly ash Jim Bridger JB12	37.47	17.55	5.48	25.09	3.98	1.31			0.45	0.91	4.71	2.36		20.85	10	30	0	36	0	1.51	50	10	241.004			10.1016/j.cemconcomp.2019.05.017
harvested landfilled fly ash Nucla	50.3	23.61	2.76	11.46	0.93	4.4			0.9	0.47	2.5	2.56		32.75	10	30	0	36	0	1.51	50	10	360.669			10.1016/j.cemconcomp.2019.05.017
ground lightweight aggregate inert GLWA	62.41	18.73	8.26	2.18	2.48	0.55			3.59	2.11					10	30	0	36	0	1.51	50	10	252.941			10.1016/j.cemconcomp.2019.05.017
quartz powder	99.4	0.35	0.02	0.03					0.01						10	30	0	36	0	1.51	50	10	82.3529			10.1016/j.cemconcomp.2019.05.017
limestone powder	0.66	0.24	0.1	55.44	0.77	0.13			0.06	0					10	30	0	36	0	1.51	50	10	22.0588			10.1016/j.cemconcomp.2019.05.017
basic oxygen gurnace slag	16.15	4.31	27.03	41.03	3.64	0.16			0.17	0.2					10	30	0	36	0	1.51	50	10	217.647			10.1016/j.cemconcomp.2019.05.017
municipal solid waste incineration fly ash	3.79	1.08	4.53	55.86	3.39	8.56			7.63	5.75					10	30	0	36	0	1.51	50	10	113.235			10.1016/j.cemconcomp.2019.05.017
ground pumice	76.2	13.5	1.1	0.8	0.05				1.8	1.6					10	30	0	36	0	1.51	50	10	269.118			10.1016/j.cemconcomp.2019.05.017
ground glass	72	1		5	4					13					10	30	0	36	0	1.51	50	10	210.294			10.1016/j.cemconcomp.2019.05.017
basalt fines	44.88	15.34	13.98	10.49	6.01				0.21	2.4					10	30	0	36	0	1.51	50	10	19.1176			10.1016/j.cemconcomp.2019.05.017
limestone powder	0.46	2.8		54.8							43.9			15.2	10	30	0	36	0	1.51	50	10		21.2052		10.1016/j.cemconcomp.2020.103742
slag	32.1	12.9	0.7	42.4	6.53	3.03			0.27	0.13	2.7			11.1	10	30	0	36	0	1.51	50	10		45.3746		10.1016/j.cemconcomp.2020.103742
Fly ash 1	56	21.7	13	4.8	1.03	0.37			2.57	0.3	1.6			14.7	10	30	0	36	0	1.51	50	10		73.6482		10.1016/j.cemconcomp.2020.103742
Fly ash 1	58.7	25.7	3.7	9	1.1	0.1					0.7			19.9	10	30	0	36	0	1.51	50	10		74.7883		10.1016/j.cemconcomp.2020.103742
glass powder LA	53.6	13.7	0.4	21.9	1.1				0.6	0.5	0.6			11.2	10	30	0	36	0	1.51	50	10		74.7883		10.1016/j.cemconcomp.2020.103742
pumice 1	76.3	12.1	1.7	0.4		0			0.7	0.6				18	10	30	0	36	0	1.51	50	10		75.2443		10.1016/j.cemconcomp.2020.103742
glass powder HA	71	0.8	0.3	9.4	3.1	0.1			0.5	13	1.1			8.8	10	30	0	36	0	1.51	50	10		90.7492		10.1016/j.cemconcomp.2020.103742
lassenite	64.2	13.7	5.7	1.6	0.8	1			1.6	1.6	8.8			3.7	10	30	0	36	0	1.51	50	10		93.0293		10.1016/j.cemconcomp.2020.103742
pumice 2	69	10.9	1.3	0.8	0.46	0.05			5.04	2.04	3.4			12.9	10	30	0	36	0	1.51	50	10		98.7296		10.1016/j.cemconcomp.2020.103742
metakaolin	51.5	44.1	1.4	0.1	0.2				0.2	0.1	0.4			4.2	10	30	0	36	0	1.51	50	10		107.622		10.1016/j.cemconcomp.2020.103742
OPC	20.6	4.7	3.9	64.8	1.19	2.44			0.35	0.16	1.9			14.9	10	30	0	36	0	1.51	50					10.1016/j.cemconcomp.2020.103742
Fly ash 1	58.7	25.7	3.7	9	1.1	0.1					0.7			19.9	10	30	0	36	0	1.51	50	10	346.667			10.1016/j.cemconcomp.2020.103742
Fly ash 1	56	21.7	13	4.8	1.03	0.37			2.57	0.3	1.6			14.7	10	30	0	36	0	1.51	50	10	289.697			10.1016/j.cemconcomp.2020.103742
glass powder LA	53.6	13.7	0.4	21.9	1.1				0.6	0.5	0.6			11.2	10	30	0	36	0	1.51	50	10	290.909			10.1016/j.cemconcomp.2020.103742
glass powder HA	71	0.8	0.3	9.4	3.1	0.1			0.5	13	1.1			8.8	10	30	0	36	0	1.51	50	10	329.697			10.1016/j.cemconcomp.2020.103742
lassenite	64.2	13.7	5.7	1.6	0.8	1			1.6	1.6	8.8			3.7	10	30	0	36	0	1.51	50	10	215.758			10.1016/j.cemconcomp.2020.103742
limestone powder	0.46	2.8		54.8							43.9			15.2	10	30	0	36	0	1.51	50	10	21.8182			10.1016/j.cemconcomp.2020.103742
metakaolin	51.5	44.1	1.4	0.1	0.2				0.2	0.1	0.4			4.2	10	30	0	36	0	1.51	50	10	492.121			10.1016/j.cemconcomp.2020.103742
pumice 1	76.3	12.1	1.7	0.4		0			0.7	0.6				18	10	30	0	36	0	1.51	50	10	187.879			10.1016/j.cemconcomp.2020.103742
pumice 2	69	10.9	1.3	0.8	0.46	0.05			5.04	2.04	3.4			12.9	10	30	0	36	0	1.51	50	10	269.091			10.1016/j.cemconcomp.2020.103742
slag	32.1	12.9	0.7	42.4	6.53	3.03			0.27	0.13	2.7			11.1	10	30	0	36	0	1.51	50	10	450.909			10.1016/j.cemconcomp.2020.103742
Fly ash 1	58.7	25.7	3.7	9	1.1	0.1					0.7			19.9	10	30	0	36	0	1.51	50	10			20.9286	10.1016/j.cemconcomp.2020.103742
Fly ash 1	56	21.7	13	4.8	1.03	0.37			2.57	0.3	1.6			14.7	10	30	0	36	0	1.51	50	10			19.3571	10.1016/j.cemconcomp.2020.103742
glass powder LA	53.6	13.7	0.4	21.9	1.1				0.6	0.5	0.6			11.2	10	30	0	36	0	1.51	50	10			19.3571	10.1016/j.cemconcomp.2020.103742
glass powder HA	71	0.8	0.3	9.4	3.1	0.1			0.5	13	1.1			8.8	10	30	0	36	0	1.51	50	10			15.9286	10.1016/j.cemconcomp.2020.103742
lassenite	64.2	13.7	5.7	1.6	0.8	1			1.6	1.6	8.8			3.7	10	30	0	36	0	1.51	50	10			14.7857	10.1016/j.cemconcomp.2020.103742
limestone powder	0.46	2.8		54.8							43.9			15.2	10	30	0	36	0	1.51	50	10			3.78571	10.1016/j.cemconcomp.2020.103742
metakaolin	51.5	44.1	1.4	0.1	0.2				0.2	0.1	0.4			4.2	10	30	0	36	0	1.51	50	10			31.7857	10.1016/j.cemconcomp.2020.103742
pumice 1	76.3	12.1	1.7	0.4		0			0.7	0.6				18	10	30	0	36	0	1.51	50	10			14.6429	10.1016/j.cemconcomp.2020.103742
pumice 2	69	10.9	1.3	0.8	0.46	0.05			5.04	2.04	3.4			12.9	10	30	0	36	0	1.51	50	10			18.3571	10.1016/j.cemconcomp.2020.103742
slag	32.1	12.9	0.7	42.4	6.53	3.03			0.27	0.13	2.7			11.1	10	30	0	36	0	1.51	50	10			27.6429	10.1016/j.cemconcomp.2020.103742
fluidized bed combustion fly Ash FBC1	52.9	21.5	7	4.3	0.8	1.2	1.7	0	3.3	0.4	6	2.681	18.8	37.9	10	30	5	52.8	1	0.2	40	7		39.9		10.1016/j.cemconcomp.2022.104708
ground bottom ash GBA3	42.9	16.6	7.5	23	4.6	0.4	0	0	0.4	1	1.4	3.001	48.4	13.3	10	30	5	52.8	1	0.2	40	7		53.5		10.1016/j.cemconcomp.2022.104708
fluidized bed combustion fly Ash FBC2	43	17	8.6	14.4	1.3	8	1.1	0	2.2	0.3	3.4	2.671	50.7	37.3	10	30	5	52.8	1	0.2	40	7		62.4		10.1016/j.cemconcomp.2022.104708
volcanic ash VA3	70.4	12.8	2	1.9	1	0.1	0.2	0.1	4.1	2.8	3.2	2.501	50.2	8.9	10	30	5	52.8	1	0.2	40	7		73.7		10.1016/j.cemconcomp.2022.104708
ground bottom ash GBA1	47.6	20.1	24.1	2.8	0.9	0.1	0	0	1.9	0.7	0	2.893	58.9	11.8	10	30	5	52.8	1	0.2	40	7		74.5		10.1016/j.cemconcomp.2022.104708
ground bottom ash GBA2	57	17.9	5.8	11.5	2.5	1.2	0	0	1	0.3	1.1	2.689	63.4	13.4	10	30	5	52.8	1	0.2	40	7		75.7		10.1016/j.cemconcomp.2022.104708
volcanic ash VA1	71.9	12.1	0.8	0.7	0.2	0.1	0	0.3	4.7	3.6	4.8	2.405	93.8	11.8	10	30	5	52.8	1	0.2	40	7		83.9		10.1016/j.cemconcomp.2022.104708
calcined clay CC1	56	25	14.6	0.1	0.4	0	1.1	0	1.3	0.2	0.6	2.886	49.1	9.2	10	30	5	52.8	1	0.2	40	7		84.2		10.1016/j.cemconcomp.2022.104708
volcanic ash VA2	72.4	11.5	1.3	0.8	0.3	0	0.1	0	5.2	2.4	4.2	2.417	100	6.3	10	30	5	52.8	1	0.2	40	7		86.8		10.1016/j.cemconcomp.2022.104708
calcined clay CC2	56.3	34.9	2.7	0.3	0.3	0.1	2.1	0	1.2	0	1.7	2.752	71.9	26.8	10	30	5	52.8	1	0.2	40	7		111.6		10.1016/j.cemconcomp.2022.104708
calcined clay CC3	54.4	36.8	0.7	0.1	0	0.1	3.1	0	0.3	0	4.2	2.659	66.2	9	10	30	5	52.8	1	0.2	40	7		159.2		10.1016/j.cemconcomp.2022.104708
calcined clay CC1	56	25	14.6	0.1	0.4	0	1.1	0	1.3	0.2	0.6	2.886	49.1	9.2	10	30	5	52.8	1	0.2	40	3	347			10.1016/j.cemconcomp.2022.104708
calcined clay CC2	56.3	34.9	2.7	0.3	0.3	0.1	2.1	0	1.2	0	1.7	2.752	71.9	26.8	10	30	5	52.8	1	0.2	40	3	523.2			10.1016/j.cemconcomp.2022.104708
calcined clay CC3	54.4	36.8	0.7	0.1	0	0.1	3.1	0	0.3	0	4.2	2.659	66.2	9	10	30	5	52.8	1	0.2	40	3	595.6			10.1016/j.cemconcomp.2022.104708
volcanic ash VA1	71.9	12.1	0.8	0.7	0.2	0.1	0	0.3	4.7	3.6	4.8	2.405	93.8	11.8	10	30	5	52.8	1	0.2	40	3	142.9			10.1016/j.cemconcomp.2022.104708
volcanic ash VA2	72.4	11.5	1.3	0.8	0.3	0	0.1	0	5.2	2.4	4.2	2.417	100	6.3	10	30	5	52.8	1	0.2	40	3	191.8			10.1016/j.cemconcomp.2022.104708
volcanic ash VA3	70.4	12.8	2	1.9	1	0.1	0.2	0.1	4.1	2.8	3.2	2.501	50.2	8.9	10	30	5	52.8	1	0.2	40	3	136.7			10.1016/j.cemconcomp.2022.104708
ground bottom ash GBA1	47.6	20.1	24.1	2.8	0.9	0.1	0	0	1.9	0.7	0	2.893	58.9	11.8	10	30	5	52.8	1	0.2	40	3	194			10.1016/j.cemconcomp.2022.104708
ground bottom ash GBA2	57	17.9	5.8	11.5	2.5	1.2	0	0	1	0.3	1.1	2.689	63.4	13.4	10	30	5	52.8	1	0.2	40	3	200.1			10.1016/j.cemconcomp.2022.104708
ground bottom ash GBA3	42.9	16.6	7.5	23	4.6	0.4	0	0	0.4	1	1.4	3.001	48.4	13.3	10	30	5	52.8	1	0.2	40	3	151.5			10.1016/j.cemconcomp.2022.104708
fluidized bed combustion fly Ash FBC1	52.9	21.5	7	4.3	0.8	1.2	1.7	0	3.3	0.4	6	2.681	18.8	37.9	10	30	5	52.8	1	0.2	40	3	140.8			10.1016/j.cemconcomp.2022.104708
fluidized bed combustion fly Ash FBC2	43	17	8.6	14.4	1.3	8	1.1	0	2.2	0.3	3.4	2.671	50.7	37.3	10	30	5	52.8	1	0.2	40	3	199.6			10.1016/j.cemconcomp.2022.104708
calcined clay CC1	56	25	14.6	0.1	0.4	0	1.1	0	1.3	0.2	0.6	2.886	49.1	9.2	10	30	5	52.8	1	0.2	40	7	374.7			10.1016/j.cemconcomp.2022.104708
calcined clay CC2	56.3	34.9	2.7	0.3	0.3	0.1	2.1	0	1.2	0	1.7	2.752	71.9	26.8	10	30	5	52.8	1	0.2	40	7	776.9			10.1016/j.cemconcomp.2022.104708
calcined clay CC3	54.4	36.8	0.7	0.1	0	0.1	3.1	0	0.3	0	4.2	2.659	66.2	9	10	30	5	52.8	1	0.2	40	7	647			10.1016/j.cemconcomp.2022.104708
volcanic ash VA1	71.9	12.1	0.8	0.7	0.2	0.1	0	0.3	4.7	3.6	4.8	2.405	93.8	11.8	10	30	5	52.8	1	0.2	40	7	198.1			10.1016/j.cemconcomp.2022.104708
volcanic ash VA2	72.4	11.5	1.3	0.8	0.3	0	0.1	0	5.2	2.4	4.2	2.417	100	6.3	10	30	5	52.8	1	0.2	40	7	269.9			10.1016/j.cemconcomp.2022.104708
volcanic ash VA3	70.4	12.8	2	1.9	1	0.1	0.2	0.1	4.1	2.8	3.2	2.501	50.2	8.9	10	30	5	52.8	1	0.2	40	7	180.5			10.1016/j.cemconcomp.2022.104708
ground bottom ash GBA1	47.6	20.1	24.1	2.8	0.9	0.1	0	0	1.9	0.7	0	2.893	58.9	11.8	10	30	5	52.8	1	0.2	40	7	346.4			10.1016/j.cemconcomp.2022.104708
ground bottom ash GBA2	57	17.9	5.8	11.5	2.5	1.2	0	0	1	0.3	1.1	2.689	63.4	13.4	10	30	5	52.8	1	0.2	40	7	352.4			10.1016/j.cemconcomp.2022.104708
ground bottom ash GBA3	42.9	16.6	7.5	23	4.6	0.4	0	0	0.4	1	1.4	3.001	48.4	13.3	10	30	5	52.8	1	0.2	40	7	244.4			10.1016/j.cemconcomp.2022.104708
fluidized bed combustion fly Ash FBC1	52.9	21.5	7	4.3	0.8	1.2	1.7	0	3.3	0.4	6	2.681	18.8	37.9	10	30	5	52.8	1	0.2	40	7	178.6			10.1016/j.cemconcomp.2022.104708
fluidized bed combustion fly Ash FBC2	43	17	8.6	14.4	1.3	8	1.1	0	2.2	0.3	3.4	2.671	50.7	37.3	10	30	5	52.8	1	0.2	40	7	294.6			10.1016/j.cemconcomp.2022.104708
calcined clay CC1	56	25	14.6	0.1	0.4	0	1.1	0	1.3	0.2	0.6	2.886	49.1	9.2	10	30	5	52.8	1	0.2	40	1			9.74436	10.1016/j.cemconcomp.2022.104708
calcined clay CC1	56	25	14.6	0.1	0.4	0	1.1	0	1.3	0.2	0.6	2.886	49.1	9.2	10	30	5	52.8	1	0.2	40	3			10.2977	10.1016/j.cemconcomp.2022.104708
calcined clay CC1	56	25	14.6	0.1	0.4	0	1.1	0	1.3	0.2	0.6	2.886	49.1	9.2	10	30	5	52.8	1	0.2	40	7			10.5865	10.1016/j.cemconcomp.2022.104708
calcined clay CC1	56	25	14.6	0.1	0.4	0	1.1	0	1.3	0.2	0.6	2.886	49.1	9.2	10	30	5	52.8	1	0.2	40	14			10.8752	10.1016/j.cemconcomp.2022.104708
calcined clay CC1	56	25	14.6	0.1	0.4	0	1.1	0	1.3	0.2	0.6	2.886	49.1	9.2	10	30	5	52.8	1	0.2	40	21			10.8992	10.1016/j.cemconcomp.2022.104708
calcined clay CC1	56	25	14.6	0.1	0.4	0	1.1	0	1.3	0.2	0.6	2.886	49.1	9.2	10	30	5	52.8	1	0.2	40	28			11.0677	10.1016/j.cemconcomp.2022.104708
calcined clay CC2	56.3	34.9	2.7	0.3	0.3	0.1	2.1	0	1.2	0	1.7	2.752	71.9	26.8	10	30	5	52.8	1	0.2	40	1			7.07368	10.1016/j.cemconcomp.2022.104708
calcined clay CC2	56.3	34.9	2.7	0.3	0.3	0.1	2.1	0	1.2	0	1.7	2.752	71.9	26.8	10	30	5	52.8	1	0.2	40	3			9.33534	10.1016/j.cemconcomp.2022.104708
calcined clay CC2	56.3	34.9	2.7	0.3	0.3	0.1	2.1	0	1.2	0	1.7	2.752	71.9	26.8	10	30	5	52.8	1	0.2	40	7			10.2015	10.1016/j.cemconcomp.2022.104708
calcined clay CC2	56.3	34.9	2.7	0.3	0.3	0.1	2.1	0	1.2	0	1.7	2.752	71.9	26.8	10	30	5	52.8	1	0.2	40	14			10.9233	10.1016/j.cemconcomp.2022.104708
calcined clay CC2	56.3	34.9	2.7	0.3	0.3	0.1	2.1	0	1.2	0	1.7	2.752	71.9	26.8	10	30	5	52.8	1	0.2	40	21			11.188	10.1016/j.cemconcomp.2022.104708
calcined clay CC2	56.3	34.9	2.7	0.3	0.3	0.1	2.1	0	1.2	0	1.7	2.752	71.9	26.8	10	30	5	52.8	1	0.2	40	28			11.4045	10.1016/j.cemconcomp.2022.104708
calcined clay CC3	54.4	36.8	0.7	0.1	0	0.1	3.1	0	0.3	0	4.2	2.659	66.2	9	10	30	5	52.8	1	0.2	40	1			11.9579	10.1016/j.cemconcomp.2022.104708
calcined clay CC3	54.4	36.8	0.7	0.1	0	0.1	3.1	0	0.3	0	4.2	2.659	66.2	9	10	30	5	52.8	1	0.2	40	3			13.8346	10.1016/j.cemconcomp.2022.104708
calcined clay CC3	54.4	36.8	0.7	0.1	0	0.1	3.1	0	0.3	0	4.2	2.659	66.2	9	10	30	5	52.8	1	0.2	40	7			14.1474	10.1016/j.cemconcomp.2022.104708
calcined clay CC3	54.4	36.8	0.7	0.1	0	0.1	3.1	0	0.3	0	4.2	2.659	66.2	9	10	30	5	52.8	1	0.2	40	14			14.4361	10.1016/j.cemconcomp.2022.104708
calcined clay CC3	54.4	36.8	0.7	0.1	0	0.1	3.1	0	0.3	0	4.2	2.659	66.2	9	10	30	5	52.8	1	0.2	40	21			14.6286	10.1016/j.cemconcomp.2022.104708
calcined clay CC3	54.4	36.8	0.7	0.1	0	0.1	3.1	0	0.3	0	4.2	2.659	66.2	9	10	30	5	52.8	1	0.2	40	28			14.6526	10.1016/j.cemconcomp.2022.104708
volcanic ash VA1	71.9	12.1	0.8	0.7	0.2	0.1	0	0.3	4.7	3.6	4.8	2.405	93.8	11.8	10	30	5	52.8	1	0.2	40	1			4.40301	10.1016/j.cemconcomp.2022.104708
volcanic ash VA1	71.9	12.1	0.8	0.7	0.2	0.1	0	0.3	4.7	3.6	4.8	2.405	93.8	11.8	10	30	5	52.8	1	0.2	40	3			5.89474	10.1016/j.cemconcomp.2022.104708
volcanic ash VA1	71.9	12.1	0.8	0.7	0.2	0.1	0	0.3	4.7	3.6	4.8	2.405	93.8	11.8	10	30	5	52.8	1	0.2	40	7			6.85714	10.1016/j.cemconcomp.2022.104708
volcanic ash VA1	71.9	12.1	0.8	0.7	0.2	0.1	0	0.3	4.7	3.6	4.8	2.405	93.8	11.8	10	30	5	52.8	1	0.2	40	14			7.67519	10.1016/j.cemconcomp.2022.104708
volcanic ash VA1	71.9	12.1	0.8	0.7	0.2	0.1	0	0.3	4.7	3.6	4.8	2.405	93.8	11.8	10	30	5	52.8	1	0.2	40	21			8.03609	10.1016/j.cemconcomp.2022.104708
volcanic ash VA1	71.9	12.1	0.8	0.7	0.2	0.1	0	0.3	4.7	3.6	4.8	2.405	93.8	11.8	10	30	5	52.8	1	0.2	40	28			8.30075	10.1016/j.cemconcomp.2022.104708
volcanic ash VA2	72.4	11.5	1.3	0.8	0.3	0	0.1	0	5.2	2.4	4.2	2.417	100	6.3	10	30	5	52.8	1	0.2	40	1			5.22105	10.1016/j.cemconcomp.2022.104708
volcanic ash VA2	72.4	11.5	1.3	0.8	0.3	0	0.1	0	5.2	2.4	4.2	2.417	100	6.3	10	30	5	52.8	1	0.2	40	7			7.26617	10.1016/j.cemconcomp.2022.104708
volcanic ash VA2	72.4	11.5	1.3	0.8	0.3	0	0.1	0	5.2	2.4	4.2	2.417	100	6.3	10	30	5	52.8	1	0.2	40	14			8.37293	10.1016/j.cemconcomp.2022.104708
volcanic ash VA2	72.4	11.5	1.3	0.8	0.3	0	0.1	0	5.2	2.4	4.2	2.417	100	6.3	10	30	5	52.8	1	0.2	40	21			8.56541	10.1016/j.cemconcomp.2022.104708
volcanic ash VA2	72.4	11.5	1.3	0.8	0.3	0	0.1	0	5.2	2.4	4.2	2.417	100	6.3	10	30	5	52.8	1	0.2	40	28			8.68571	10.1016/j.cemconcomp.2022.104708
volcanic ash VA3	70.4	12.8	2	1.9	1	0.1	0.2	0.1	4.1	2.8	3.2	2.501	50.2	8.9	10	30	5	52.8	1	0.2	40	1			4.25865	10.1016/j.cemconcomp.2022.104708
volcanic ash VA3	70.4	12.8	2	1.9	1	0.1	0.2	0.1	4.1	2.8	3.2	2.501	50.2	8.9	10	30	5	52.8	1	0.2	40	3			5.65414	10.1016/j.cemconcomp.2022.104708
volcanic ash VA3	70.4	12.8	2	1.9	1	0.1	0.2	0.1	4.1	2.8	3.2	2.501	50.2	8.9	10	30	5	52.8	1	0.2	40	7			6.80902	10.1016/j.cemconcomp.2022.104708
volcanic ash VA3	70.4	12.8	2	1.9	1	0.1	0.2	0.1	4.1	2.8	3.2	2.501	50.2	8.9	10	30	5	52.8	1	0.2	40	14			7.38647	10.1016/j.cemconcomp.2022.104708
volcanic ash VA3	70.4	12.8	2	1.9	1	0.1	0.2	0.1	4.1	2.8	3.2	2.501	50.2	8.9	10	30	5	52.8	1	0.2	40	21			7.60301	10.1016/j.cemconcomp.2022.104708
volcanic ash VA3	70.4	12.8	2	1.9	1	0.1	0.2	0.1	4.1	2.8	3.2	2.501	50.2	8.9	10	30	5	52.8	1	0.2	40	28			7.86767	10.1016/j.cemconcomp.2022.104708
ground bottom ash GBA1	47.6	20.1	24.1	2.8	0.9	0.1	0	0	1.9	0.7	0	2.893	58.9	11.8	10	30	5	52.8	1	0.2	40	1			3.65714	10.1016/j.cemconcomp.2022.104708
ground bottom ash GBA1	47.6	20.1	24.1	2.8	0.9	0.1	0	0	1.9	0.7	0	2.893	58.9	11.8	10	30	5	52.8	1	0.2	40	3			5.41353	10.1016/j.cemconcomp.2022.104708
ground bottom ash GBA1	47.6	20.1	24.1	2.8	0.9	0.1	0	0	1.9	0.7	0	2.893	58.9	11.8	10	30	5	52.8	1	0.2	40	7			6.90526	10.1016/j.cemconcomp.2022.104708
ground bottom ash GBA1	47.6	20.1	24.1	2.8	0.9	0.1	0	0	1.9	0.7	0	2.893	58.9	11.8	10	30	5	52.8	1	0.2	40	14			7.93985	10.1016/j.cemconcomp.2022.104708
ground bottom ash GBA1	47.6	20.1	24.1	2.8	0.9	0.1	0	0	1.9	0.7	0	2.893	58.9	11.8	10	30	5	52.8	1	0.2	40	21			8.32481	10.1016/j.cemconcomp.2022.104708
ground bottom ash GBA1	47.6	20.1	24.1	2.8	0.9	0.1	0	0	1.9	0.7	0	2.893	58.9	11.8	10	30	5	52.8	1	0.2	40	28			8.85414	10.1016/j.cemconcomp.2022.104708
ground bottom ash GBA2	57	17.9	5.8	11.5	2.5	1.2	0	0	1	0.3	1.1	2.689	63.4	13.4	10	30	5	52.8	1	0.2	40	1			3.46466	10.1016/j.cemconcomp.2022.104708
ground bottom ash GBA2	57	17.9	5.8	11.5	2.5	1.2	0	0	1	0.3	1.1	2.689	63.4	13.4	10	30	5	52.8	1	0.2	40	7			6.4	10.1016/j.cemconcomp.2022.104708
ground bottom ash GBA2	57	17.9	5.8	11.5	2.5	1.2	0	0	1	0.3	1.1	2.689	63.4	13.4	10	30	5	52.8	1	0.2	40	14			7.62707	10.1016/j.cemconcomp.2022.104708
ground bottom ash GBA2	57	17.9	5.8	11.5	2.5	1.2	0	0	1	0.3	1.1	2.689	63.4	13.4	10	30	5	52.8	1	0.2	40	21			8.18045	10.1016/j.cemconcomp.2022.104708
ground bottom ash GBA2	57	17.9	5.8	11.5	2.5	1.2	0	0	1	0.3	1.1	2.689	63.4	13.4	10	30	5	52.8	1	0.2	40	28			8.58947	10.1016/j.cemconcomp.2022.104708
ground bottom ash GBA3	42.9	16.6	7.5	23	4.6	0.4	0	0	0.4	1	1.4	3.001	48.4	13.3	10	30	5	52.8	1	0.2	40	1			3.58496	10.1016/j.cemconcomp.2022.104708
ground bottom ash GBA3	42.9	16.6	7.5	23	4.6	0.4	0	0	0.4	1	1.4	3.001	48.4	13.3	10	30	5	52.8	1	0.2	40	3			4.57143	10.1016/j.cemconcomp.2022.104708
ground bottom ash GBA3	42.9	16.6	7.5	23	4.6	0.4	0	0	0.4	1	1.4	3.001	48.4	13.3	10	30	5	52.8	1	0.2	40	7			5.43759	10.1016/j.cemconcomp.2022.104708
ground bottom ash GBA3	42.9	16.6	7.5	23	4.6	0.4	0	0	0.4	1	1.4	3.001	48.4	13.3	10	30	5	52.8	1	0.2	40	14			6.49624	10.1016/j.cemconcomp.2022.104708
ground bottom ash GBA3	42.9	16.6	7.5	23	4.6	0.4	0	0	0.4	1	1.4	3.001	48.4	13.3	10	30	5	52.8	1	0.2	40	21			6.90526	10.1016/j.cemconcomp.2022.104708
ground bottom ash GBA3	42.9	16.6	7.5	23	4.6	0.4	0	0	0.4	1	1.4	3.001	48.4	13.3	10	30	5	52.8	1	0.2	40	28			7.09774	10.1016/j.cemconcomp.2022.104708
fluidized bed combustion fly Ash FBC1	52.9	21.5	7	4.3	0.8	1.2	1.7	0	3.3	0.4	6	2.681	18.8	37.9	10	30	5	52.8	1	0.2	40	1			3.84962	10.1016/j.cemconcomp.2022.104708
fluidized bed combustion fly Ash FBC1	52.9	21.5	7	4.3	0.8	1.2	1.7	0	3.3	0.4	6	2.681	18.8	37.9	10	30	5	52.8	1	0.2	40	3			5.07669	10.1016/j.cemconcomp.2022.104708
fluidized bed combustion fly Ash FBC1	52.9	21.5	7	4.3	0.8	1.2	1.7	0	3.3	0.4	6	2.681	18.8	37.9	10	30	5	52.8	1	0.2	40	7			6.0391	10.1016/j.cemconcomp.2022.104708
fluidized bed combustion fly Ash FBC1	52.9	21.5	7	4.3	0.8	1.2	1.7	0	3.3	0.4	6	2.681	18.8	37.9	10	30	5	52.8	1	0.2	40	14			6.4	10.1016/j.cemconcomp.2022.104708
fluidized bed combustion fly Ash FBC1	52.9	21.5	7	4.3	0.8	1.2	1.7	0	3.3	0.4	6	2.681	18.8	37.9	10	30	5	52.8	1	0.2	40	21			6.44812	10.1016/j.cemconcomp.2022.104708
fluidized bed combustion fly Ash FBC1	52.9	21.5	7	4.3	0.8	1.2	1.7	0	3.3	0.4	6	2.681	18.8	37.9	10	30	5	52.8	1	0.2	40	28			6.59248	10.1016/j.cemconcomp.2022.104708
fluidized bed combustion fly Ash FBC2	43	17	8.6	14.4	1.3	8	1.1	0	2.2	0.3	3.4	2.671	50.7	37.3	10	30	5	52.8	1	0.2	40	1			3.87368	10.1016/j.cemconcomp.2022.104708
fluidized bed combustion fly Ash FBC2	43	17	8.6	14.4	1.3	8	1.1	0	2.2	0.3	3.4	2.671	50.7	37.3	10	30	5	52.8	1	0.2	40	3			6.85714	10.1016/j.cemconcomp.2022.104708
fluidized bed combustion fly Ash FBC2	43	17	8.6	14.4	1.3	8	1.1	0	2.2	0.3	3.4	2.671	50.7	37.3	10	30	5	52.8	1	0.2	40	7			8.32481	10.1016/j.cemconcomp.2022.104708
fluidized bed combustion fly Ash FBC2	43	17	8.6	14.4	1.3	8	1.1	0	2.2	0.3	3.4	2.671	50.7	37.3	10	30	5	52.8	1	0.2	40	14			9.4797	10.1016/j.cemconcomp.2022.104708
fluidized bed combustion fly Ash FBC2	43	17	8.6	14.4	1.3	8	1.1	0	2.2	0.3	3.4	2.671	50.7	37.3	10	30	5	52.8	1	0.2	40	21			9.76842	10.1016/j.cemconcomp.2022.104708
fluidized bed combustion fly Ash FBC2	43	17	8.6	14.4	1.3	8	1.1	0	2.2	0.3	3.4	2.671	50.7	37.3	10	30	5	52.8	1	0.2	40	28			10.1053	10.1016/j.cemconcomp.2022.104708
ground granulated blast furnace slag GGBS 1	36.4	13.6		41.4	6.8		0.75								10	30	0	52.7	1.2	0.24	40	1	232.581			10.1016/j.cemconres.2020.105998
ground granulated blast furnace slag GGBS 2	36.6	12		42	6.94		0.74								10	30	0	52.7	1.2	0.24	40	1	245			10.1016/j.cemconres.2020.105998
ground granulated blast furnace slag GGBS 3	37.6	9.61		40.9	6.4		0.61								10	30	0	52.7	1.2	0.24	40	1	220.161			10.1016/j.cemconres.2020.105998
ground granulated blast furnace slag GGBS 4	37	9.41		42.1	6.12		0.66								10	30	0	52.7	1.2	0.24	40	1	232.581			10.1016/j.cemconres.2020.105998
ground granulated blast furnace slag GGBS 5	37.1	12.9		38.4	7.32		0.77								10	30	0	52.7	1.2	0.24	40	1	232.581			10.1016/j.cemconres.2020.105998
ground granulated blast furnace slag GGBS 6	35.6	11		41.2	6.84		1.79								10	30	0	52.7	1.2	0.24	40	1	196.452			10.1016/j.cemconres.2020.105998
ground granulated blast furnace slag GGBS 7	36.7	11.5		41.7	6.35		0.7								10	30	0	52.7	1.2	0.24	40	1	249.516			10.1016/j.cemconres.2020.105998
ground granulated blast furnace slag GGBS 8	36.6	11.2		40.9	6.84		1.12								10	30	0	52.7	1.2	0.24	40	1	235.968			10.1016/j.cemconres.2020.105998
ground granulated blast furnace slag GGBS 9	37.4	11		39.5	6.64		3.02								10	30	0	52.7	1.2	0.24	40	1	143.387			10.1016/j.cemconres.2020.105998
ground granulated blast furnace slag GGBS 10	38	10.1		41.7	6.46		0.4								10	30	0	52.7	1.2	0.24	40	1	249.516			10.1016/j.cemconres.2020.105998
ground granulated blast furnace slag GGBS 11	36.3	11.8		43.2	6.3		0.43								10	30	0	52.7	1.2	0.24	40	1	286.774			10.1016/j.cemconres.2020.105998
ground granulated blast furnace slag GGBS 12	36.8	11.7		42	6.6		0.7								10	30	0	52.7	1.2	0.24	40	1	232.581			10.1016/j.cemconres.2020.105998
ground granulated blast furnace slag GGBS 13	39.2	11.2		33.9	10.4		0.57						97.4		10	30	0	52.7	1.2	0.24	40	1	187.419			10.1016/j.cemconres.2020.105998
ground granulated blast furnace slag GGBS 14	34.6	13.7		38.9	8.36		1.16								10	30	0	52.7	1.2	0.24	40	1	302.581			10.1016/j.cemconres.2020.105998
ground granulated blast furnace slag GGBS 15	34.6	20.1		29	11.6		0.78						96.2		10	30	0	52.7	1.2	0.24	40	1	319.516			10.1016/j.cemconres.2020.105998
ground granulated blast furnace slag GGBS 16	36.7	6.8		37.4	11.1		0.2								10	30	0	52.7	1.2	0.24	40	1	137.742			10.1016/j.cemconres.2020.105998
ground granulated blast furnace slag GGBS 2	36.6	12		42	6.94		0.74								10	20	0	24.2028	0	0.6972	40	1	240			10.1016/j.cemconres.2020.105998
ground granulated blast furnace slag GGBS 3	37.6	9.61		40.9	6.4		0.61								10	20	0	24.2028	0	0.6972	40	1	218			10.1016/j.cemconres.2020.105998
ground granulated blast furnace slag GGBS 11	36.3	11.8		43.2	6.3		0.43								10	20	0	24.2028	0	0.6972	40	1	250			10.1016/j.cemconres.2020.105998
ground granulated blast furnace slag GGBS 12	36.8	11.7		42	6.6		0.7								10	20	0	24.2028	0	0.6972	40	1	230			10.1016/j.cemconres.2020.105998
ground granulated blast furnace slag GGBS 13	39.2	11.2		33.9	10.4		0.57						97.4		10	20	0	24.2028	0	0.6972	40	1	184			10.1016/j.cemconres.2020.105998
ground granulated blast furnace slag GGBS 14	34.6	13.7		38.9	8.36		1.16								10	20	0	24.2028	0	0.6972	40	1	257			10.1016/j.cemconres.2020.105998
Pure Metakaolin MP	51.1	45.7	0.6	0.1	0	0.1			0.3	0.3			98.82	6.7	10	30	5	52.704	1.08	0.216	40			17.1		10.1016/j.cemconres.2021.106709
Impure Metakaolin MI	54.6	36	2.9	0.4	0.3	0			1.4	0			77.01	19.5	10	30	5	52.704	1.08	0.216	40			25.1		10.1016/j.cemconres.2021.106709
Pure Pumicite PP	74	13.1	2.1	0.3	0	0			4.3	4.4			90.47	5.2	10	30	5	52.704	1.08	0.216	40			29.6		10.1016/j.cemconres.2021.106709
Overburden, Impure Pumicite PI	64.9	11.8	2.5	1.1	0.3	0			4	3.8			68.84	5.9	10	30	5	52.704	1.08	0.216	40			30.5		10.1016/j.cemconres.2021.106709
Pumiceous Tuff PT	72.5	14.1	1.8	2	1.2	0.1			5	2.8			66.84	7.3	10	30	5	52.704	1.08	0.216	40			33.1		10.1016/j.cemconres.2021.106709
Class F Fly Ash FA	54.8	21.2	4.7	11.2	2.5	0.5			1	0.1			82.84	16.7	10	30	5	52.704	1.08	0.216	40			36.2		10.1016/j.cemconres.2021.106709
Milled Bottom Ash MBA	54.4	21.6	5.4	11.1	2.4	0.3			0.9	0.1			65.85	32.8	10	30	5	52.704	1.08	0.216	40			36.6		10.1016/j.cemconres.2021.106709
Class C Fly Ash CA	39.7	19.6	5.3	21.9	5.7	1.4			0.6	1.5			75.39	12.4	10	30	5	52.704	1.08	0.216	40			38.4		10.1016/j.cemconres.2021.106709
Slag Grade 100 S	35.2	10.6	1.5	39	10.7	2.6			0.5	0.3			95.46	8.6	10	30	5	52.704	1.08	0.216	40			39.2		10.1016/j.cemconres.2021.106709
Titanium(IV) Oxide TiO2	0	0	0	0	0	0	99.9		0	0				3.4	10	30	5	52.704	1.08	0.216	40			43.2		10.1016/j.cemconres.2021.106709
60 wt% OPC and 40 wt% Q Blend OPC-Q40	52	3.4	1.2	38.9	0.8	2			0.5	0.1				14.5	10	30	5	52.704	1.08	0.216	40			43.3		10.1016/j.cemconres.2021.106709
Inert Fine Quartz Powder Q	99.2	0.2	0.1	0.2	0	0.1			0	0				16.2	10	30	5	52.704	1.08	0.216	40			47.1		10.1016/j.cemconres.2021.106709
40 wt% OPC and 60 wt% Q Blend OPC-Q60	67.7	2.4	0.8	26	0.6	1.4			0.4	0.1				15.1	10	30	5	52.704	1.08	0.216	40			48.0		10.1016/j.cemconres.2021.106709
Type I Ordinary Portland Cement OPC	20.5	5.6	1.9	64.7	1.4	3.3	0.2		0.9	0.2				13.4	10	30	5	52.704	1.08	0.216	40			50.1		10.1016/j.cemconres.2021.106709
basis-grade titanium(IV) oxide TiO2	0	0	0	0	0	0	0	0	99.9					3.4	10	30	5	52.704	1.08	0.216	40	7	8			10.1016/j.cemconres.2021.106709
Pumiceous Tuff pumice PT	72.5	14.1	1.8	2	1.2	0.1	2.8	5						7.3	10	30	5	52.704	1.08	0.216	40	7	200			10.1016/j.cemconres.2021.106709
basis-grade titanium(IV) oxide TiO2	0	0	0	0	0	0	0	0	99.9					3.4	10	30	5	52.704	1.08	0.216	40	7			2.2	10.1016/j.cemconres.2021.106709
Pumiceous Tuff pumice PT	72.5	14.1	1.8	2	1.2	0.1	2.8	5						7.3	10	30	5	52.704	1.08	0.216	40	7			6.7	10.1016/j.cemconres.2021.106709
Type I Ordinary Portland Cement OPC	20.5	5.6	1.9	64.7	1.4	3.3	0.2		0.9	0.2				13.4	10	30	5	52.704	1.08	0.216	40		422			10.1016/j.cemconres.2021.106709
60 wt% OPC and 40 wt% Q Blend OPC-Q40	52	3.4	1.2	38.9	0.8	2			0.5	0.1				14.5	10	30	5	52.704	1.08	0.216	40		21			10.1016/j.cemconres.2021.106709
40 wt% OPC and 60 wt% Q Blend OPC-Q60	67.7	2.4	0.8	26	0.6	1.4			0.4	0.1				15.1	10	30	5	52.704	1.08	0.216	40		271			10.1016/j.cemconres.2021.106709
Inert Fine Quartz Powder Q	99.2	0.2	0.1	0.2	0	0.1			0	0				16.2	10	30	5	52.704	1.08	0.216	40		183			10.1016/j.cemconres.2021.106709
Titanium(IV) Oxide TiO2	0	0	0	0	0	0	99.9		0	0				3.4	10	30	5	52.704	1.08	0.216	40		8			10.1016/j.cemconres.2021.106709
Class C Fly Ash CA	39.7	19.6	5.3	21.9	5.7	1.4			0.6	1.5			75.39	12.4	10	30	5	52.704	1.08	0.216	40		316			10.1016/j.cemconres.2021.106709
Class F Fly Ash FA	54.8	21.2	4.7	11.2	2.5	0.5			1	0.1			82.84	16.7	10	30	5	52.704	1.08	0.216	40		262			10.1016/j.cemconres.2021.106709
Milled Bottom Ash MBA	54.4	21.6	5.4	11.1	2.4	0.3			0.9	0.1			65.85	32.8	10	30	5	52.704	1.08	0.216	40		164			10.1016/j.cemconres.2021.106709
Pure Metakaolin MP	51.1	45.7	0.6	0.1	0	0.1			0.3	0.3			98.82	6.7	10	30	5	52.704	1.08	0.216	40		1030			10.1016/j.cemconres.2021.106709
Impure Metakaolin MI	54.6	36	2.9	0.4	0.3	0			1.4	0			77.01	19.5	10	30	5	52.704	1.08	0.216	40		619			10.1016/j.cemconres.2021.106709
Pure Pumicite PP	74	13.1	2.1	0.3	0	0			4.3	4.4			90.47	5.2	10	30	5	52.704	1.08	0.216	40		263			10.1016/j.cemconres.2021.106709
Overburden, Impure Pumicite PI	64.9	11.8	2.5	1.1	0.3	0			4	3.8			68.84	5.9	10	30	5	52.704	1.08	0.216	40		234			10.1016/j.cemconres.2021.106709
Pumiceous Tuff PT	72.5	14.1	1.8	2	1.2	0.1			5	2.8			66.84	7.3	10	30	5	52.704	1.08	0.216	40		200			10.1016/j.cemconres.2021.106709
Slag Grade 100 S	35.2	10.6	1.5	39	10.7	2.6			0.5	0.3			95.46	8.6	10	30	5	52.704	1.08	0.216	40		510			10.1016/j.cemconres.2021.106709
Type I Ordinary Portland Cement OPC	20.5	5.6	1.9	64.7	1.4	3.3	0.2		0.9	0.2				13.4	10	30	5	52.704	1.08	0.216	40				6.8	10.1016/j.cemconres.2021.106709
60 wt% OPC and 40 wt% Q Blend OPC-Q40	52	3.4	1.2	38.9	0.8	2			0.5	0.1				14.5	10	30	5	52.704	1.08	0.216	40				2.0	10.1016/j.cemconres.2021.106709
40 wt% OPC and 60 wt% Q Blend OPC-Q60	67.7	2.4	0.8	26	0.6	1.4			0.4	0.1				15.1	10	30	5	52.704	1.08	0.216	40				5.3	10.1016/j.cemconres.2021.106709
Inert Fine Quartz Powder Q	99.2	0.2	0.1	0.2	0	0.1			0	0				16.2	10	30	5	52.704	1.08	0.216	40				4.5	10.1016/j.cemconres.2021.106709
Titanium(IV) Oxide TiO2	0	0	0	0	0	0	99.9		0	0				3.4	10	30	5	52.704	1.08	0.216	40				2.2	10.1016/j.cemconres.2021.106709
Class C Fly Ash CA	39.7	19.6	5.3	21.9	5.7	1.4			0.6	1.5			75.39	12.4	10	30	5	52.704	1.08	0.216	40				7.5	10.1016/j.cemconres.2021.106709
Class F Fly Ash FA	54.8	21.2	4.7	11.2	2.5	0.5			1	0.1			82.84	16.7	10	30	5	52.704	1.08	0.216	40				6.8	10.1016/j.cemconres.2021.106709
Milled Bottom Ash MBA	54.4	21.6	5.4	11.1	2.4	0.3			0.9	0.1			65.85	32.8	10	30	5	52.704	1.08	0.216	40				5.2	10.1016/j.cemconres.2021.106709
Pure Metakaolin MP	51.1	45.7	0.6	0.1	0	0.1			0.3	0.3			98.82	6.7	10	30	5	52.704	1.08	0.216	40				16.9	10.1016/j.cemconres.2021.106709
Impure Metakaolin MI	54.6	36	2.9	0.4	0.3	0			1.4	0			77.01	19.5	10	30	5	52.704	1.08	0.216	40				11.6	10.1016/j.cemconres.2021.106709
Pure Pumicite PP	74	13.1	2.1	0.3	0	0			4.3	4.4			90.47	5.2	10	30	5	52.704	1.08	0.216	40				7.6	10.1016/j.cemconres.2021.106709
Overburden, Impure Pumicite PI	64.9	11.8	2.5	1.1	0.3	0			4	3.8			68.84	5.9	10	30	5	52.704	1.08	0.216	40				7.1	10.1016/j.cemconres.2021.106709
Pumiceous Tuff PT	72.5	14.1	1.8	2	1.2	0.1			5	2.8			66.84	7.3	10	30	5	52.704	1.08	0.216	40				6.7	10.1016/j.cemconres.2021.106709
Slag Grade 100 S	35.2	10.6	1.5	39	10.7	2.6			0.5	0.3			95.46	8.6	10	30	5	52.704	1.08	0.216	40				7.8	10.1016/j.cemconres.2021.106709
slag MS1	30.8	16.5		43.9	6.2		0.6						100		10	30	0	50	1	2	40	1	452			10.1016/j.cemconres.2024.107439
slag MS2	31	16.4		41.2	8.1		1						100		10	30	0	50	1	2	40	1	435			10.1016/j.cemconres.2024.107439
slag MS3	31.1	16.5		38.4	10		1.4						100		10	30	0	50	1	2	40	1	452			10.1016/j.cemconres.2024.107439
slag MS4	30.7	16.5		36.1	11.9		2.3						100		10	30	0	50	1	2	40	1	416			10.1016/j.cemconres.2024.107439
slag MS5	31.3	11.7		43.8	10		1						92		10	30	0	50	1	2	40	1	412			10.1016/j.cemconres.2024.107439
slag MS6	32.3	11.7		41.1	12		0.6						94		10	30	0	50	1	2	40	1	399			10.1016/j.cemconres.2024.107439
slag MS7	39.2	11.7		38.2	6.2		2.4						100		10	30	0	50	1	2	40	1	137			10.1016/j.cemconres.2024.107439
slag MS8	40.4	11.7		36.5	8		1.5						100		10	30	0	50	1	2	40	1	158			10.1016/j.cemconres.2024.107439
slag MS9	31.6	10.1		42.1	12.1		1.5						84		10	30	0	50	1	2	40	1	357			10.1016/j.cemconres.2024.107439
slag MS10	34.6	9.8		41.4	10		2.4						97		10	30	0	50	1	2	40	1	207			10.1016/j.cemconres.2024.107439
slag MS11	40.6	9.8		39.1	8		0.6						100		10	30	0	50	1	2	40	1	172			10.1016/j.cemconres.2024.107439
slag MS12	44.5	9.8		36.9	6.1		1						100		10	30	0	50	1	2	40	1	128			10.1016/j.cemconres.2024.107439
slag MS13	35.6	7.9		44.2	8.1		2.4						93		10	30	0	50	1	2	40	1	165			10.1016/j.cemconres.2024.107439
slag MS14	41.9	8.1		40.8	6.3		1.5						100		10	30	0	50	1	2	40	1	128			10.1016/j.cemconres.2024.107439
slag MS15	38.9	8		38.1	11.8		1						100		10	30	0	50	1	2	40	1	160			10.1016/j.cemconres.2024.107439
slag MS16	43.3	7.9		36	9.8		0.6						100		10	30	0	50	1	2	40	1	125			10.1016/j.cemconres.2024.107439
mixed glass powder MGP	67.89	2.1	0.5	10.8	1.64	0.14	0.1		0.72	13.17	2.38	2.75		17.33	11.11	33.33	5.56	60	1.2	0.24	40	7			1.9	10.1016/j.conbuildmat.2019.117192
white glass powder WGP	71.8	1.7	0.2	11.4	1.3	0.2			0.1	13.2	0.1	2.66		27.21	11.11	33.33	5.56	60	1.2	0.24	40	7			1.41	10.1016/j.conbuildmat.2019.117192
soda-lime green glass powder GGP	69.9	2.5	0.7	10.4	1.7	0.1	0.1		1	13.2	0.1	2.7		27.98	11.11	33.33	5.56	60	1.2	0.24	40	7			1.34	10.1016/j.conbuildmat.2019.117192
brown glass powder BGP	70	2.2	0.5	11	1.2	0.1			0.7	14	0.2	2.64		22.88	11.11	33.33	5.56	60	1.2	0.24	40	7			1.41	10.1016/j.conbuildmat.2019.117192
blue glass powder BLGP	70.9	1.4	0.4	12.1	0.7	0.1	0.1		0.4	14		2.72		27.05	11.11	33.33	5.56	60	1.2	0.24	40	7			1.56	10.1016/j.conbuildmat.2019.117192
fluorescent lamp glass powder FLGP	69.6	2.3	0.3	6.3	2.9	0.2			1.4	15.5	0.95	2.62		30.57	11.11	33.33	5.56	60	1.2	0.24	40	7			1.26	10.1016/j.conbuildmat.2019.117192
ordinary portland cement ASTM Type I CEM	19.37	3.77	3.08	63.85	1.47	5.38	0.26	0.06	0.69		2.07	3.21		21.61	11.11	33.33	5.56	60	1.2	0.24	40	7				10.1016/j.conbuildmat.2019.117192
pulverized fly ash PFA	48.5	32.6	6.6	6.6	1.5	1	1.5	0.1	1.1	2.52		2.41		24.57	11.11	33.33	5.56	60	1.2	0.24	40	7			2.14	10.1016/j.conbuildmat.2019.117192
incinerated bottom ash IBA	37.72	8.46	3.95	21.6	1.75	2.33	1.1	0.2	1.61			2.94		30.99	11.11	33.33	5.56	60	1.2	0.24	40	7			0.78	10.1016/j.conbuildmat.2019.117192
quartz sand powder QSP	97.5	0.5	1.2	0.2	0.1				0.2		0.1	2.73		10.49	11.11	33.33	5.56	60	1.2	0.24	40	7			0.14	10.1016/j.conbuildmat.2019.117192
calcined kaolinitic clay K1	49.63	46.85	1.51	0.08	0.02	0.17	0.79	0.79			3.03	2.68	83.7	5.7	12.5	37.5	0	60	1.47	0.32	40				5.8	10.1016/j.conbuildmat.2020.119292
calcined kaolinitic clay K2	56.36	36.77	3.57	0.13	0.09	0.03	2.47	2.47	0.24	0.17	1.6	2.66	71.9	5.5	12.5	37.5	0	60	1.47	0.32	40				5.3	10.1016/j.conbuildmat.2020.119292
low-calcium siliceous fly ash FA	67.66	22.18	5.32	0.32	0.18	0.02	0.12	0.12	1.6	0.43	0.85	2.22	58.6	12.2	12.5	37.5	0	60	1.47	0.32	40				1.9	10.1016/j.conbuildmat.2020.119292
slag S	32.26	23.16	1.93	33.88	7.01		0.65		0.65	0.34	-0.32	2.87	87.9	12.2	12.5	37.5	0	60	1.47	0.32	40				6.6	10.1016/j.conbuildmat.2020.119292
limestone LS	11.02	2.53	1.55	45.59	1.96		0.28		0.28	0.5	36.56	2.64	1.8	6.2	12.5	37.5	0	60	1.47	0.32	40					10.1016/j.conbuildmat.2020.119292
Blend of calcined clay + limestone B1	36.76	32.0767	1.52333	15.25	0.666667	0.113333	0.62	0.526667	0.28	0.5	14.2067	2.66667		5.86667	12.5	37.5	0	60	1.47	0.32	40				7.2	10.1016/j.conbuildmat.2020.119292
Blend of calcined clay + limestone B2	41.2467	25.3567	2.89667	15.2833	0.713333	0.02	1.74	2.47	0.253333	0.28	13.2533	2.65333		5.73333	12.5	37.5	0	60	1.47	0.32	40				5.6	10.1016/j.conbuildmat.2020.119292
Blend of fly ash + slag B3	55.86	22.5067	4.19	11.5067	2.45667	0.02	0.296667	0.12	1.28333	0.4	0.46	2.43667		12.2	12.5	37.5	0	60	1.47	0.32	40				3.8	10.1016/j.conbuildmat.2020.119292
calcined kaolinitic clay K1	49.63	46.85	1.51	0.08	0.02	0.17	0.79	0.79			3.03	2.68	83.7	5.7	12.5	37.5	0	60	1.47	0.32	40	1.00516	106.067			10.1016/j.conbuildmat.2020.119292
calcined kaolinitic clay K1	49.63	46.85	1.51	0.08	0.02	0.17	0.79	0.79			3.03	2.68	83.7	5.7	12.5	37.5	0	60	1.47	0.32	40	1.98679	124.045			10.1016/j.conbuildmat.2020.119292
calcined kaolinitic clay K1	49.63	46.85	1.51	0.08	0.02	0.17	0.79	0.79			3.03	2.68	83.7	5.7	12.5	37.5	0	60	1.47	0.32	40	3.09374	130.722			10.1016/j.conbuildmat.2020.119292
calcined kaolinitic clay K1	49.63	46.85	1.51	0.08	0.02	0.17	0.79	0.79			3.03	2.68	83.7	5.7	12.5	37.5	0	60	1.47	0.32	40	5.16951	136.629			10.1016/j.conbuildmat.2020.119292
calcined kaolinitic clay K1	49.63	46.85	1.51	0.08	0.02	0.17	0.79	0.79			3.03	2.68	83.7	5.7	12.5	37.5	0	60	1.47	0.32	40	7	140.738			10.1016/j.conbuildmat.2020.119292
calcined kaolinitic clay K2	56.36	36.77	3.57	0.13	0.09	0.03	2.47	2.47	0.24	0.17	1.6	2.66	71.9	5.5	12.5	37.5	0	60	1.47	0.32	40	1.07873	92.7127			10.1016/j.conbuildmat.2020.119292
calcined kaolinitic clay K2	56.36	36.77	3.57	0.13	0.09	0.03	2.47	2.47	0.24	0.17	1.6	2.66	71.9	5.5	12.5	37.5	0	60	1.47	0.32	40	2.03144	107.095			10.1016/j.conbuildmat.2020.119292
calcined kaolinitic clay K2	56.36	36.77	3.57	0.13	0.09	0.03	2.47	2.47	0.24	0.17	1.6	2.66	71.9	5.5	12.5	37.5	0	60	1.47	0.32	40	4.09597	116.083			10.1016/j.conbuildmat.2020.119292
calcined kaolinitic clay K2	56.36	36.77	3.57	0.13	0.09	0.03	2.47	2.47	0.24	0.17	1.6	2.66	71.9	5.5	12.5	37.5	0	60	1.47	0.32	40	4.99047	118.138			10.1016/j.conbuildmat.2020.119292
calcined kaolinitic clay K2	56.36	36.77	3.57	0.13	0.09	0.03	2.47	2.47	0.24	0.17	1.6	2.66	71.9	5.5	12.5	37.5	0	60	1.47	0.32	40	7	119.936			10.1016/j.conbuildmat.2020.119292
Blend of fly ash + slag B3	55.86	22.5067	4.19	11.5067	2.45667	0.02	0.296667	0.12	1.28333	0.4	0.46	2.43667		12.2	12.5	37.5	0	60	1.47	0.32	40	0.983491	43.6597			10.1016/j.conbuildmat.2020.119292
Blend of fly ash + slag B3	55.86	22.5067	4.19	11.5067	2.45667	0.02	0.296667	0.12	1.28333	0.4	0.46	2.43667		12.2	12.5	37.5	0	60	1.47	0.32	40	1.98842	66.7737			10.1016/j.conbuildmat.2020.119292
Blend of fly ash + slag B3	55.86	22.5067	4.19	11.5067	2.45667	0.02	0.296667	0.12	1.28333	0.4	0.46	2.43667		12.2	12.5	37.5	0	60	1.47	0.32	40	3.02119	78.3307			10.1016/j.conbuildmat.2020.119292
Blend of fly ash + slag B3	55.86	22.5067	4.19	11.5067	2.45667	0.02	0.296667	0.12	1.28333	0.4	0.46	2.43667		12.2	12.5	37.5	0	60	1.47	0.32	40	5.04599	92.9695			10.1016/j.conbuildmat.2020.119292
Blend of fly ash + slag B3	55.86	22.5067	4.19	11.5067	2.45667	0.02	0.296667	0.12	1.28333	0.4	0.46	2.43667		12.2	12.5	37.5	0	60	1.47	0.32	40	7	102.215			10.1016/j.conbuildmat.2020.119292
slag S	32.26	23.16	1.93	33.88	7.01		0.65		0.65	0.34	-0.32	2.87	87.9	12.2	12.5	37.5	0	60	1.47	0.32	40	1.08482	97.5923			10.1016/j.conbuildmat.2020.119292
slag S	32.26	23.16	1.93	33.88	7.01		0.65		0.65	0.34	-0.32	2.87	87.9	12.2	12.5	37.5	0	60	1.47	0.32	40	2.03777	115.313			10.1016/j.conbuildmat.2020.119292
slag S	32.26	23.16	1.93	33.88	7.01		0.65		0.65	0.34	-0.32	2.87	87.9	12.2	12.5	37.5	0	60	1.47	0.32	40	3.09326	124.045			10.1016/j.conbuildmat.2020.119292
slag S	32.26	23.16	1.93	33.88	7.01		0.65		0.65	0.34	-0.32	2.87	87.9	12.2	12.5	37.5	0	60	1.47	0.32	40	4.59575	130.209			10.1016/j.conbuildmat.2020.119292
slag S	32.26	23.16	1.93	33.88	7.01		0.65		0.65	0.34	-0.32	2.87	87.9	12.2	12.5	37.5	0	60	1.47	0.32	40	7	136.116			10.1016/j.conbuildmat.2020.119292
Blend of calcined clay + limestone B1	36.76	32.0767	1.52333	15.25	0.666667	0.113333	0.62	0.526667	0.28	0.5	14.2067	2.66667		5.86667	12.5	37.5	0	60	1.47	0.32	40	0.740966	99.39			10.1016/j.conbuildmat.2020.119292
Blend of calcined clay + limestone B1	36.76	32.0767	1.52333	15.25	0.666667	0.113333	0.62	0.526667	0.28	0.5	14.2067	2.66667		5.86667	12.5	37.5	0	60	1.47	0.32	40	1.28129	119.165			10.1016/j.conbuildmat.2020.119292
Blend of calcined clay + limestone B1	36.76	32.0767	1.52333	15.25	0.666667	0.113333	0.62	0.526667	0.28	0.5	14.2067	2.66667		5.86667	12.5	37.5	0	60	1.47	0.32	40	2.42868	130.209			10.1016/j.conbuildmat.2020.119292
Blend of calcined clay + limestone B1	36.76	32.0767	1.52333	15.25	0.666667	0.113333	0.62	0.526667	0.28	0.5	14.2067	2.66667		5.86667	12.5	37.5	0	60	1.47	0.32	40	4.71093	137.4			10.1016/j.conbuildmat.2020.119292
Blend of calcined clay + limestone B1	36.76	32.0767	1.52333	15.25	0.666667	0.113333	0.62	0.526667	0.28	0.5	14.2067	2.66667		5.86667	12.5	37.5	0	60	1.47	0.32	40	7	141.766			10.1016/j.conbuildmat.2020.119292
Blend of calcined clay + limestone B2	41.2467	25.3567	2.89667	15.2833	0.713333	0.02	1.74	2.47	0.253333	0.28	13.2533	2.65333		5.73333	12.5	37.5	0	60	1.47	0.32	40	0.549255	64.2055			10.1016/j.conbuildmat.2020.119292
Blend of calcined clay + limestone B2	41.2467	25.3567	2.89667	15.2833	0.713333	0.02	1.74	2.47	0.253333	0.28	13.2533	2.65333		5.73333	12.5	37.5	0	60	1.47	0.32	40	1.29121	97.5923			10.1016/j.conbuildmat.2020.119292
Blend of calcined clay + limestone B2	41.2467	25.3567	2.89667	15.2833	0.713333	0.02	1.74	2.47	0.253333	0.28	13.2533	2.65333		5.73333	12.5	37.5	0	60	1.47	0.32	40	2.76553	110.69			10.1016/j.conbuildmat.2020.119292
Blend of calcined clay + limestone B2	41.2467	25.3567	2.89667	15.2833	0.713333	0.02	1.74	2.47	0.253333	0.28	13.2533	2.65333		5.73333	12.5	37.5	0	60	1.47	0.32	40	4.41695	115.056			10.1016/j.conbuildmat.2020.119292
Blend of calcined clay + limestone B2	41.2467	25.3567	2.89667	15.2833	0.713333	0.02	1.74	2.47	0.253333	0.28	13.2533	2.65333		5.73333	12.5	37.5	0	60	1.47	0.32	40	7	118.652			10.1016/j.conbuildmat.2020.119292
low-calcium siliceous fly ash FA	67.66	22.18	5.32	0.32	0.18	0.02	0.12	0.12	1.6	0.43	0.85	2.22	58.6	12.2	12.5	37.5	0	60	1.47	0.32	40	1.36532	11.8138			10.1016/j.conbuildmat.2020.119292
low-calcium siliceous fly ash FA	67.66	22.18	5.32	0.32	0.18	0.02	0.12	0.12	1.6	0.43	0.85	2.22	58.6	12.2	12.5	37.5	0	60	1.47	0.32	40	3.0805	25.939			10.1016/j.conbuildmat.2020.119292
low-calcium siliceous fly ash FA	67.66	22.18	5.32	0.32	0.18	0.02	0.12	0.12	1.6	0.43	0.85	2.22	58.6	12.2	12.5	37.5	0	60	1.47	0.32	40	4.95615	39.2937			10.1016/j.conbuildmat.2020.119292
low-calcium siliceous fly ash FA	67.66	22.18	5.32	0.32	0.18	0.02	0.12	0.12	1.6	0.43	0.85	2.22	58.6	12.2	12.5	37.5	0	60	1.47	0.32	40	5.90247	44.4302			10.1016/j.conbuildmat.2020.119292
low-calcium siliceous fly ash FA	67.66	22.18	5.32	0.32	0.18	0.02	0.12	0.12	1.6	0.43	0.85	2.22	58.6	12.2	12.5	37.5	0	60	1.47	0.32	40	7	49.053			10.1016/j.conbuildmat.2020.119292
Control OPC	22.37	4.36	3.38	61.08	2.43	2.45					1.33			21.06							20					10.1016/j.conbuildmat.2020.120436
Fly ash	42.47	26.01	8.44	14.01	3.15	1.57					1.72			17.62							20					10.1016/j.conbuildmat.2020.120436
Silica fume	87.67	0.28	0.6	0.63	3.41	0.84								2.82							20					10.1016/j.conbuildmat.2020.120436
quartz powder	99.76	0.04	0.01	0.01	0.01									194.61							20					10.1016/j.conbuildmat.2020.120436
cement A100	22.37	4.36	3.38	61.08	2.43	2.45								21.06	10	0	0	4	0	0	20	3	250.18			10.1016/j.conbuildmat.2020.120436
cement+silica fume B5A95	25.635	4.156	3.241	58.0575	2.479	2.3695								20.148	10	0	0	4	0	0	20	3	256.88			10.1016/j.conbuildmat.2020.120436
cement+silica fume+quartz powder B5A95	41.113	3.292	2.567	45.8435	1.995	1.8795								54.858	10	0	0	4	0	0	20	3	212.56			10.1016/j.conbuildmat.2020.120436
cement+silica fume+quartz powder B5D30A65	31.665	10.651	4.759	43.9365	2.695	2.1055								19.113	10	0	0	4	0	0	20	3	179.32			10.1016/j.conbuildmat.2020.120436
cement+silica fume+fly ash B5C20D30A45	47.143	9.787	4.085	31.7225	2.211	1.6155								53.823	10	0	0	4	0	0	20	3	137.26			10.1016/j.conbuildmat.2020.120436
cement+quartz powder C10A90	30.109	3.928	3.043	54.973	2.188	2.205								38.415	10	0	0	4	0	0	20	3	232.32			10.1016/j.conbuildmat.2020.120436
cement+silica fume+quartz powder C10B10A80	36.639	3.52	2.765	48.928	2.286	2.044								36.591	10	0	0	4	0	0	20	3	240.72			10.1016/j.conbuildmat.2020.120436
cement+quartz powder+ fly ash C10D30A60	36.139	10.423	4.561	40.852	2.404	1.941								37.38	10	0	0	4	0	0	20	3	156.59			10.1016/j.conbuildmat.2020.120436
cement+silica fume+ quartz powder+fly ash C10B10D30A50	42.669	10.015	4.283	34.807	2.502	1.78								35.556	10	0	0	4	0	0	20	3	158.53			10.1016/j.conbuildmat.2020.120436
cement+fly ash D15A85	25.385	7.6075	4.139	54.0195	2.538	2.318								20.5425	10	0	0	4	0	0	20	3	210.83			10.1016/j.conbuildmat.2020.120436
cement+silica fume+fly ash D15B10A75	31.915	7.1995	3.861	47.9745	2.636	2.157								18.7185	10	0	0	4	0	0	20	3	221.68			10.1016/j.conbuildmat.2020.120436
cement+quartz powder+fly ash D15C20A65	40.863	6.7435	3.465	41.8055	2.054	1.828								55.2525	10	0	0	4	0	0	20	3	169.42			10.1016/j.conbuildmat.2020.120436
cement+silica fume+ quartz powder+fly ash D15B10C20A55	47.393	6.3355	3.187	35.7605	2.152	1.667								53.4285	10	0	0	4	0	0	20	3	178.06			10.1016/j.conbuildmat.2020.120436
cement A100	22.37	4.36	3.38	61.08	2.43	2.45								21.06	10	0	0	4	0	0	20	1	176.6			10.1016/j.conbuildmat.2020.120436
cement+silica fume B5A95	25.635	4.156	3.241	58.0575	2.479	2.3695								20.148	10	0	0	4	0	0	20	1	178.92			10.1016/j.conbuildmat.2020.120436
cement+silica fume+quartz powder B5A95	41.113	3.292	2.567	45.8435	1.995	1.8795								54.858	10	0	0	4	0	0	20	1	151.17			10.1016/j.conbuildmat.2020.120436
cement+silica fume+quartz powder B5D30A65	31.665	10.651	4.759	43.9365	2.695	2.1055								19.113	10	0	0	4	0	0	20	1	124.43			10.1016/j.conbuildmat.2020.120436
cement+silica fume+fly ash B5C20D30A45	47.143	9.787	4.085	31.7225	2.211	1.6155								53.823	10	0	0	4	0	0	20	1	93.85			10.1016/j.conbuildmat.2020.120436
cement+quartz powder C10A90	30.109	3.928	3.043	54.973	2.188	2.205								38.415	10	0	0	4	0	0	20	1	165.25			10.1016/j.conbuildmat.2020.120436
cement+silica fume+quartz powder C10B10A80	36.639	3.52	2.765	48.928	2.286	2.044								36.591	10	0	0	4	0	0	20	1	166.53			10.1016/j.conbuildmat.2020.120436
cement+quartz powder+ fly ash C10D30A60	36.139	10.423	4.561	40.852	2.404	1.941								37.38	10	0	0	4	0	0	20	1	110.5			10.1016/j.conbuildmat.2020.120436
cement+silica fume+ quartz powder+fly ash C10B10D30A50	42.669	10.015	4.283	34.807	2.502	1.78								35.556	10	0	0	4	0	0	20	1	107.87			10.1016/j.conbuildmat.2020.120436
cement+fly ash D15A85	25.385	7.6075	4.139	54.0195	2.538	2.318								20.5425	10	0	0	4	0	0	20	1	150.33			10.1016/j.conbuildmat.2020.120436
cement+silica fume+fly ash D15B10A75	31.915	7.1995	3.861	47.9745	2.636	2.157								18.7185	10	0	0	4	0	0	20	1	153.23			10.1016/j.conbuildmat.2020.120436
cement+quartz powder+fly ash D15C20A65	40.863	6.7435	3.465	41.8055	2.054	1.828								55.2525	10	0	0	4	0	0	20	1	121.48			10.1016/j.conbuildmat.2020.120436
cement+silica fume+ quartz powder+fly ash D15B10C20A55	47.393	6.3355	3.187	35.7605	2.152	1.667								53.4285	10	0	0	4	0	0	20	1	121.97			10.1016/j.conbuildmat.2020.120436
cement A100	22.37	4.36	3.38	61.08	2.43	2.45								21.06	10	0	0	4	0	0	20	0.5	117.79			10.1016/j.conbuildmat.2020.120436
cement+silica fume B5A95	25.635	4.156	3.241	58.0575	2.479	2.3695								20.148	10	0	0	4	0	0	20	0.5	120.72			10.1016/j.conbuildmat.2020.120436
cement+silica fume+quartz powder B5A95	41.113	3.292	2.567	45.8435	1.995	1.8795								54.858	10	0	0	4	0	0	20	0.5	100.15			10.1016/j.conbuildmat.2020.120436
cement+silica fume+quartz powder B5D30A65	31.665	10.651	4.759	43.9365	2.695	2.1055								19.113	10	0	0	4	0	0	20	0.5	83.79			10.1016/j.conbuildmat.2020.120436
cement+silica fume+fly ash B5C20D30A45	47.143	9.787	4.085	31.7225	2.211	1.6155								53.823	10	0	0	4	0	0	20	0.5	59.25			10.1016/j.conbuildmat.2020.120436
cement+quartz powder C10A90	30.109	3.928	3.043	54.973	2.188	2.205								38.415	10	0	0	4	0	0	20	0.5	106.1			10.1016/j.conbuildmat.2020.120436
cement+silica fume+quartz powder C10B10A80	36.639	3.52	2.765	48.928	2.286	2.044								36.591	10	0	0	4	0	0	20	0.5	113.31			10.1016/j.conbuildmat.2020.120436
cement+quartz powder+ fly ash C10D30A60	36.139	10.423	4.561	40.852	2.404	1.941								37.38	10	0	0	4	0	0	20	0.5	70.32			10.1016/j.conbuildmat.2020.120436
cement+silica fume+ quartz powder+fly ash C10B10D30A50	42.669	10.015	4.283	34.807	2.502	1.78								35.556	10	0	0	4	0	0	20	0.5	70.28			10.1016/j.conbuildmat.2020.120436
cement+fly ash D15A85	25.385	7.6075	4.139	54.0195	2.538	2.318								20.5425	10	0	0	4	0	0	20	0.5	98.82			10.1016/j.conbuildmat.2020.120436
cement+silica fume+fly ash D15B10A75	31.915	7.1995	3.861	47.9745	2.636	2.157								18.7185	10	0	0	4	0	0	20	0.5	106.75			10.1016/j.conbuildmat.2020.120436
cement+quartz powder+fly ash D15C20A65	40.863	6.7435	3.465	41.8055	2.054	1.828								55.2525	10	0	0	4	0	0	20	0.5	77.11			10.1016/j.conbuildmat.2020.120436
cement+silica fume+ quartz powder+fly ash D15B10C20A55	47.393	6.3355	3.187	35.7605	2.152	1.667								53.4285	10	0	0	4	0	0	20	0.5	81.71			10.1016/j.conbuildmat.2020.120436
ground quartz GQ	98.5	0.5	0.1	0.1	0.1	0.1	0.1			0.2	0.5	2.7		3.7	10	30	5	54	1	0.26	40	7		24.177		10.1016/j.conbuildmat.2022.126781
perlite PR	73.9	12.7	1.1	0.8	0.1	0.1	0.1			6	3.6	2.4		19.8	10	30	5	54	1	0.26	40	7		41.6667		10.1016/j.conbuildmat.2022.126781
blended Class F fly ash+lassenite+limestone FAB-A	66.4	14.3	5.4	1.7	0.8	1	0.6			2.8	5.7	2.4		11.8	10	30	5	54	1	0.26	40	7		46.8107		10.1016/j.conbuildmat.2022.126781
coal fly ash FFA	55.6	20.1	5.7	4.4		1.7				1.6		2.5		6.5	10	30	5	54	1	0.26	40	7		49.3827		10.1016/j.conbuildmat.2022.126781
ground glass GS-B	71	0.8	0.3	9.4	3.1	0.1	0.1			13.3	1.1	2.5		7.4	10	30	5	54	1	0.26	40	7		69.4444		10.1016/j.conbuildmat.2022.126781
pumice PM-D	72.5	13.2	0.9	1.3		0.1				1.5	4.1	2.4		4.6	10	30	5	54	1	0.26	40	7		73.5597		10.1016/j.conbuildmat.2022.126781
pumice PM-E	71.4	11.2	1.3	1.5	0.6	0.1				5.7	5.3	2.4		6.1	10	30	5	54	1	0.26	40	7		77.1605		10.1016/j.conbuildmat.2022.126781
pumice PM-B	75.2	11.4	1.4	0.5						1.3	3.4	2.4		2.8	10	30	5	54	1	0.26	40	7		96.7078		10.1016/j.conbuildmat.2022.126781
ordinary portland cement OPC	19.6	5.5	2	63.3	1.7	4				1	3.7	3.14		11.9												10.1016/j.conbuildmat.2022.126781
ground glass GE	53.6	13.7	0.4	21.9	1.1		0.1			0.9	0.6	2.6		11												10.1016/j.conbuildmat.2022.126781
ground glass GS-A	71.5	1.3	0.1	10.1	1.4	0.2	0.1			13.1	0.2	2.5		8												10.1016/j.conbuildmat.2022.126781
ground glass GS-B	71	0.8	0.3	9.4	3.1	0.1	0.1			13.3	1.1	2.5		7.4												10.1016/j.conbuildmat.2022.126781
coal fly ash CFA	35.6	17.9	5.8	27.4	6.8	1.6	1.4			1.6	0	2.6		9.8												10.1016/j.conbuildmat.2022.126781
coal fly ash FFA	55.6	20.1	5.7	4.4		1.7				1.6		2.5		6.5												10.1016/j.conbuildmat.2022.126781
ground coal bottom ash GBA	52	19.4	9.1	8.8	1.5	0.4	1.1			0.9	5.9	2.8		2.4												10.1016/j.conbuildmat.2022.126781
blended Class F fly ash+lassenite+limestone FAB-A	66.4	14.3	5.4	1.7	0.8	1	0.6			2.8	5.7	2.4		11.8												10.1016/j.conbuildmat.2022.126781
blended Class F fly ash+pumice FAB-B	65.6	19.2	3.8	2.3	0.8	0.2				3.5	2.5	2.3		9.7												10.1016/j.conbuildmat.2022.126781
pumice PM-A	75.2	11.4	1.4	0.5						1.3	3.4	2.3		6.4												10.1016/j.conbuildmat.2022.126781
pumice PM-B	75.2	11.4	1.4	0.5						1.3	3.4	2.4		2.8												10.1016/j.conbuildmat.2022.126781
pumice PM-C	73	12.2	1.1	1	0.2	0.1	0.1			5.6	4.8	2.4		17.6												10.1016/j.conbuildmat.2022.126781
pumice PM-D	72.5	13.2	0.9	1.3		0.1				1.5	4.1	2.4		4.6												10.1016/j.conbuildmat.2022.126781
pumice PM-E	71.4	11.2	1.3	1.5	0.6	0.1				5.7	5.3	2.4		6.1												10.1016/j.conbuildmat.2022.126781
perlite PR	73.9	12.7	1.1	0.8	0.1	0.1	0.1			6	3.6	2.4		19.8												10.1016/j.conbuildmat.2022.126781
lassenite LSN	64.2	13.7	5.7	1.6	0.8	1	0.5			2.7	8.8	2.5		4.9												10.1016/j.conbuildmat.2022.126781
metakaolin MK	51.5	44.1	1.4	0.1	0.2		1.9			0.2	0.4	2.6		2												10.1016/j.conbuildmat.2022.126781
silica fume SF	94.4	0.2	0.1	0.6	0.1					0.4	4	2.2		0.1												10.1016/j.conbuildmat.2022.126781
limestone LMS	3.1	0.1	0.1	52.8	1.3	0.1	0.1			0.2	42.1	2.3		4												10.1016/j.conbuildmat.2022.126781
ground quartz GQ	98.5	0.5	0.1	0.1	0.1	0.1	0.1			0.2	0.5	2.7		3.7												10.1016/j.conbuildmat.2022.126781
ground quartz GQ	98.5	0.5	0.1	0.1	0.1	0.1	0.1			0.2	0.5	2.7		3.7	10	30	5	54	1	0.26	40	7				10.1016/j.conbuildmat.2022.126781
perlite PR	73.9	12.7	1.1	0.8	0.1	0.1	0.1			6	3.6	2.4		19.8	10	30	5	54	1	0.26	40	7	143.137			10.1016/j.conbuildmat.2022.126781
ground glass GS-B	71	0.8	0.3	9.4	3.1	0.1	0.1			13.3	1.1	2.5		7.4	10	30	5	54	1	0.26	40	7	235.294			10.1016/j.conbuildmat.2022.126781
coal fly ash FFA	55.6	20.1	5.7	4.4		1.7				1.6		2.5		6.5	10	30	5	54	1	0.26	40	7	317.647			10.1016/j.conbuildmat.2022.126781
blended Class F fly ash+lassenite+limestone FAB-A	66.4	14.3	5.4	1.7	0.8	1	0.6			2.8	5.7	2.4		11.8	10	30	5	54	1	0.26	40	7	221.569			10.1016/j.conbuildmat.2022.126781
pumice PM-B	75.2	11.4	1.4	0.5						1.3	3.4	2.4		2.8	10	30	5	54	1	0.26	40	7	315.686			10.1016/j.conbuildmat.2022.126781
pumice PM-D	72.5	13.2	0.9	1.3		0.1				1.5	4.1	2.4		4.6	10	30	5	54	1	0.26	40	7	215.686			10.1016/j.conbuildmat.2022.126781
pumice PM-E	71.4	11.2	1.3	1.5	0.6	0.1				5.7	5.3	2.4		6.1	10	30	5	54	1	0.26	40	7	241.176			10.1016/j.conbuildmat.2022.126781
metakaolin MK	51.5	44.1	1.4	0.1	0.2		1.9			0.2	0.4	2.6		2	10	30	5	54	1	0.26	40	7	468.627			10.1016/j.conbuildmat.2022.126781
synthetic slag M0	42.99	13.3		43.16	0.33	0.01								24.35	10	30	5	52.704	1.08	0.216	40	0.442438	89.7833			10.1016/j.conbuildmat.2022.127493
synthetic slag M0	42.99	13.3		43.16	0.33	0.01								24.35	10	30	5	52.704	1.08	0.216	40	0.842376	469.988			10.1016/j.conbuildmat.2022.127493
synthetic slag M0	42.99	13.3		43.16	0.33	0.01								24.35	10	30	5	52.704	1.08	0.216	40	1.01129	165.635			10.1016/j.conbuildmat.2022.127493
synthetic slag M0	42.99	13.3		43.16	0.33	0.01								24.35	10	30	5	52.704	1.08	0.216	40	1.29517	185.07			10.1016/j.conbuildmat.2022.127493
synthetic slag M0	42.99	13.3		43.16	0.33	0.01								24.35	10	30	5	52.704	1.08	0.216	40	1.67375	207.066			10.1016/j.conbuildmat.2022.127493
synthetic slag M0	42.99	13.3		43.16	0.33	0.01								24.35	10	30	5	52.704	1.08	0.216	40	1.99406	222.096			10.1016/j.conbuildmat.2022.127493
synthetic slag M0	42.99	13.3		43.16	0.33	0.01								24.35	10	30	5	52.704	1.08	0.216	40	2.49175	241.015			10.1016/j.conbuildmat.2022.127493
synthetic slag M0	42.99	13.3		43.16	0.33	0.01								24.35	10	30	5	52.704	1.08	0.216	40	2.92979	254.198			10.1016/j.conbuildmat.2022.127493
synthetic slag M0	42.99	13.3		43.16	0.33	0.01								24.35	10	30	5	52.704	1.08	0.216	40	3.33766	264.012			10.1016/j.conbuildmat.2022.127493
synthetic slag M0	42.99	13.3		43.16	0.33	0.01								24.35	10	30	5	52.704	1.08	0.216	40	3.82716	274.537			10.1016/j.conbuildmat.2022.127493
synthetic slag M0	42.99	13.3		43.16	0.33	0.01								24.35	10	30	5	52.704	1.08	0.216	40	4.22868	280.54			10.1016/j.conbuildmat.2022.127493
synthetic slag M0	42.99	13.3		43.16	0.33	0.01								24.35	10	30	5	52.704	1.08	0.216	40	4.78177	288.991			10.1016/j.conbuildmat.2022.127493
synthetic slag M0	42.99	13.3		43.16	0.33	0.01								24.35	10	30	5	52.704	1.08	0.216	40	5.12182	293.513			10.1016/j.conbuildmat.2022.127493
synthetic slag M0	42.99	13.3		43.16	0.33	0.01								24.35	10	30	5	52.704	1.08	0.216	40	5.53563	298.43			10.1016/j.conbuildmat.2022.127493
synthetic slag M0	42.99	13.3		43.16	0.33	0.01								24.35	10	30	5	52.704	1.08	0.216	40	6.01435	301.866			10.1016/j.conbuildmat.2022.127493
synthetic slag M0	42.99	13.3		43.16	0.33	0.01								24.35	10	30	5	52.704	1.08	0.216	40	6.40982	303.999			10.1016/j.conbuildmat.2022.127493
synthetic slag M0	42.99	13.3		43.16	0.33	0.01								24.35	10	30	5	52.704	1.08	0.216	40	6.83613	306.783			10.1016/j.conbuildmat.2022.127493
synthetic slag M0	42.99	13.3		43.16	0.33	0.01								24.35	10	30	5	52.704	1.08	0.216	40	7	309.598			10.1016/j.conbuildmat.2022.127493
synthetic slag M8	37.79	14.51		37.04	8.83	0.01	0.7		0.25	0.24				22.73	10	30	5	52.704	1.08	0.216	40	0.221957	53.0606			10.1016/j.conbuildmat.2022.127493
synthetic slag M8	37.79	14.51		37.04	8.83	0.01	0.7		0.25	0.24				22.73	10	30	5	52.704	1.08	0.216	40	0.423321	112.774			10.1016/j.conbuildmat.2022.127493
synthetic slag M8	37.79	14.51		37.04	8.83	0.01	0.7		0.25	0.24				22.73	10	30	5	52.704	1.08	0.216	40	0.540028	146.066			10.1016/j.conbuildmat.2022.127493
synthetic slag M8	37.79	14.51		37.04	8.83	0.01	0.7		0.25	0.24				22.73	10	30	5	52.704	1.08	0.216	40	0.806094	194.88			10.1016/j.conbuildmat.2022.127493
synthetic slag M8	37.79	14.51		37.04	8.83	0.01	0.7		0.25	0.24				22.73	10	30	5	52.704	1.08	0.216	40	1.18633	235.542			10.1016/j.conbuildmat.2022.127493
synthetic slag M8	37.79	14.51		37.04	8.83	0.01	0.7		0.25	0.24				22.73	10	30	5	52.704	1.08	0.216	40	1.91196	286.378			10.1016/j.conbuildmat.2022.127493
synthetic slag M8	37.79	14.51		37.04	8.83	0.01	0.7		0.25	0.24				22.73	10	30	5	52.704	1.08	0.216	40	2.70726	315.017			10.1016/j.conbuildmat.2022.127493
synthetic slag M8	37.79	14.51		37.04	8.83	0.01	0.7		0.25	0.24				22.73	10	30	5	52.704	1.08	0.216	40	3.07734	322.6			10.1016/j.conbuildmat.2022.127493
synthetic slag M8	37.79	14.51		37.04	8.83	0.01	0.7		0.25	0.24				22.73	10	30	5	52.704	1.08	0.216	40	3.86102	337.291			10.1016/j.conbuildmat.2022.127493
synthetic slag M8	37.79	14.51		37.04	8.83	0.01	0.7		0.25	0.24				22.73	10	30	5	52.704	1.08	0.216	40	5.08804	348.297			10.1016/j.conbuildmat.2022.127493
synthetic slag M8	37.79	14.51		37.04	8.83	0.01	0.7		0.25	0.24				22.73	10	30	5	52.704	1.08	0.216	40	6.00165	353.404			10.1016/j.conbuildmat.2022.127493
synthetic slag M8	37.79	14.51		37.04	8.83	0.01	0.7		0.25	0.24				22.73	10	30	5	52.704	1.08	0.216	40	6.55313	353.547			10.1016/j.conbuildmat.2022.127493
synthetic slag M8	37.79	14.51		37.04	8.83	0.01	0.7		0.25	0.24				22.73	10	30	5	52.704	1.08	0.216	40	7	354.489			10.1016/j.conbuildmat.2022.127493
synthetic slag M16	32.99	15.05		34.09	16.07	0.01	0.73		0.21	0.22				22.29	10	30	5	52.704	1.08	0.216	40	0.161185	66.7449			10.1016/j.conbuildmat.2022.127493
synthetic slag M16	32.99	15.05		34.09	16.07	0.01	0.73		0.21	0.22				22.29	10	30	5	52.704	1.08	0.216	40	0.281217	109.101			10.1016/j.conbuildmat.2022.127493
synthetic slag M16	32.99	15.05		34.09	16.07	0.01	0.73		0.21	0.22				22.29	10	30	5	52.704	1.08	0.216	40	0.390869	147.409			10.1016/j.conbuildmat.2022.127493
synthetic slag M16	32.99	15.05		34.09	16.07	0.01	0.73		0.21	0.22				22.29	10	30	5	52.704	1.08	0.216	40	0.521645	192.143			10.1016/j.conbuildmat.2022.127493
synthetic slag M16	32.99	15.05		34.09	16.07	0.01	0.73		0.21	0.22				22.29	10	30	5	52.704	1.08	0.216	40	0.643733	227.55			10.1016/j.conbuildmat.2022.127493
synthetic slag M16	32.99	15.05		34.09	16.07	0.01	0.73		0.21	0.22				22.29	10	30	5	52.704	1.08	0.216	40	0.852224	273.837			10.1016/j.conbuildmat.2022.127493
synthetic slag M16	32.99	15.05		34.09	16.07	0.01	0.73		0.21	0.22				22.29	10	30	5	52.704	1.08	0.216	40	1.13505	317.861			10.1016/j.conbuildmat.2022.127493
synthetic slag M16	32.99	15.05		34.09	16.07	0.01	0.73		0.21	0.22				22.29	10	30	5	52.704	1.08	0.216	40	1.46539	354.268			10.1016/j.conbuildmat.2022.127493
synthetic slag M16	32.99	15.05		34.09	16.07	0.01	0.73		0.21	0.22				22.29	10	30	5	52.704	1.08	0.216	40	1.83811	383.024			10.1016/j.conbuildmat.2022.127493
synthetic slag M16	32.99	15.05		34.09	16.07	0.01	0.73		0.21	0.22				22.29	10	30	5	52.704	1.08	0.216	40	2.26704	407.51			10.1016/j.conbuildmat.2022.127493
synthetic slag M16	32.99	15.05		34.09	16.07	0.01	0.73		0.21	0.22				22.29	10	30	5	52.704	1.08	0.216	40	2.53311	418.005			10.1016/j.conbuildmat.2022.127493
synthetic slag M16	32.99	15.05		34.09	16.07	0.01	0.73		0.21	0.22				22.29	10	30	5	52.704	1.08	0.216	40	3.05764	434.85			10.1016/j.conbuildmat.2022.127493
synthetic slag M16	32.99	15.05		34.09	16.07	0.01	0.73		0.21	0.22				22.29	10	30	5	52.704	1.08	0.216	40	3.44983	443.922			10.1016/j.conbuildmat.2022.127493
synthetic slag M16	32.99	15.05		34.09	16.07	0.01	0.73		0.21	0.22				22.29	10	30	5	52.704	1.08	0.216	40	3.92737	452.521			10.1016/j.conbuildmat.2022.127493
synthetic slag M16	32.99	15.05		34.09	16.07	0.01	0.73		0.21	0.22				22.29	10	30	5	52.704	1.08	0.216	40	4.27101	457.014			10.1016/j.conbuildmat.2022.127493
synthetic slag M16	32.99	15.05		34.09	16.07	0.01	0.73		0.21	0.22				22.29	10	30	5	52.704	1.08	0.216	40	4.7521	461.279			10.1016/j.conbuildmat.2022.127493
synthetic slag M16	32.99	15.05		34.09	16.07	0.01	0.73		0.21	0.22				22.29	10	30	5	52.704	1.08	0.216	40	5.00753	464.301			10.1016/j.conbuildmat.2022.127493
synthetic slag M16	32.99	15.05		34.09	16.07	0.01	0.73		0.21	0.22				22.29	10	30	5	52.704	1.08	0.216	40	5.6067	466.078			10.1016/j.conbuildmat.2022.127493
synthetic slag M16	32.99	15.05		34.09	16.07	0.01	0.73		0.21	0.22				22.29	10	30	5	52.704	1.08	0.216	40	6.14678	468.183			10.1016/j.conbuildmat.2022.127493
synthetic slag M16	32.99	15.05		34.09	16.07	0.01	0.73		0.21	0.22				22.29	10	30	5	52.704	1.08	0.216	40	6.48615	469.304			10.1016/j.conbuildmat.2022.127493
synthetic slag M16	32.99	15.05		34.09	16.07	0.01	0.73		0.21	0.22				22.29	10	30	5	52.704	1.08	0.216	40	6.90265	469.573			10.1016/j.conbuildmat.2022.127493
synthetic slag A3	43.3	3.69		42.07	10.83	0.01								19.67	10	30	5	52.704	1.08	0.216	40	0.416669	45.0632			10.1016/j.conbuildmat.2022.127493
synthetic slag A3	43.3	3.69		42.07	10.83	0.01								19.67	10	30	5	52.704	1.08	0.216	40	0.777069	74.5645			10.1016/j.conbuildmat.2022.127493
synthetic slag A3	43.3	3.69		42.07	10.83	0.01								19.67	10	30	5	52.704	1.08	0.216	40	1.26034	106.376			10.1016/j.conbuildmat.2022.127493
synthetic slag A3	43.3	3.69		42.07	10.83	0.01								19.67	10	30	5	52.704	1.08	0.216	40	1.60429	123.792			10.1016/j.conbuildmat.2022.127493
synthetic slag A3	43.3	3.69		42.07	10.83	0.01								19.67	10	30	5	52.704	1.08	0.216	40	1.94825	139.858			10.1016/j.conbuildmat.2022.127493
synthetic slag A3	43.3	3.69		42.07	10.83	0.01								19.67	10	30	5	52.704	1.08	0.216	40	2.34565	155.426			10.1016/j.conbuildmat.2022.127493
synthetic slag A3	43.3	3.69		42.07	10.83	0.01								19.67	10	30	5	52.704	1.08	0.216	40	2.77153	169.187			10.1016/j.conbuildmat.2022.127493
synthetic slag A3	43.3	3.69		42.07	10.83	0.01								19.67	10	30	5	52.704	1.08	0.216	40	3.23698	181.16			10.1016/j.conbuildmat.2022.127493
synthetic slag A3	43.3	3.69		42.07	10.83	0.01								19.67	10	30	5	52.704	1.08	0.216	40	3.549	190.188			10.1016/j.conbuildmat.2022.127493
synthetic slag A3	43.3	3.69		42.07	10.83	0.01								19.67	10	30	5	52.704	1.08	0.216	40	4.03155	199.856			10.1016/j.conbuildmat.2022.127493
synthetic slag A3	43.3	3.69		42.07	10.83	0.01								19.67	10	30	5	52.704	1.08	0.216	40	4.30608	206.254			10.1016/j.conbuildmat.2022.127493
synthetic slag A3	43.3	3.69		42.07	10.83	0.01								19.67	10	30	5	52.704	1.08	0.216	40	4.79419	216.49			10.1016/j.conbuildmat.2022.127493
synthetic slag A3	43.3	3.69		42.07	10.83	0.01								19.67	10	30	5	52.704	1.08	0.216	40	5.16838	222.13			10.1016/j.conbuildmat.2022.127493
synthetic slag A3	43.3	3.69		42.07	10.83	0.01								19.67	10	30	5	52.704	1.08	0.216	40	5.54087	229.357			10.1016/j.conbuildmat.2022.127493
synthetic slag A3	43.3	3.69		42.07	10.83	0.01								19.67	10	30	5	52.704	1.08	0.216	40	5.98714	234.926			10.1016/j.conbuildmat.2022.127493
synthetic slag A3	43.3	3.69		42.07	10.83	0.01								19.67	10	30	5	52.704	1.08	0.216	40	6.46122	241.323			10.1016/j.conbuildmat.2022.127493
synthetic slag A3	43.3	3.69		42.07	10.83	0.01								19.67	10	30	5	52.704	1.08	0.216	40	6.76937	244.925			10.1016/j.conbuildmat.2022.127493
synthetic slag A3	43.3	3.69		42.07	10.83	0.01								19.67	10	30	5	52.704	1.08	0.216	40	7	247.678			10.1016/j.conbuildmat.2022.127493
synthetic slag A3-1	48.41	2.39		38.39	10.58	0.01				0.07				20.69	10	30	5	52.704	1.08	0.216	40	0.260209	20.2385			10.1016/j.conbuildmat.2022.127493
synthetic slag A3-1	48.41	2.39		38.39	10.58	0.01				0.07				20.69	10	30	5	52.704	1.08	0.216	40	0.617801	38.998			10.1016/j.conbuildmat.2022.127493
synthetic slag A3-1	48.41	2.39		38.39	10.58	0.01				0.07				20.69	10	30	5	52.704	1.08	0.216	40	0.980428	56.2861			10.1016/j.conbuildmat.2022.127493
synthetic slag A3-1	48.41	2.39		38.39	10.58	0.01				0.07				20.69	10	30	5	52.704	1.08	0.216	40	1.37188	73.4525			10.1016/j.conbuildmat.2022.127493
synthetic slag A3-1	48.41	2.39		38.39	10.58	0.01				0.07				20.69	10	30	5	52.704	1.08	0.216	40	1.7504	88.2872			10.1016/j.conbuildmat.2022.127493
synthetic slag A3-1	48.41	2.39		38.39	10.58	0.01				0.07				20.69	10	30	5	52.704	1.08	0.216	40	2.12784	101.675			10.1016/j.conbuildmat.2022.127493
synthetic slag A3-1	48.41	2.39		38.39	10.58	0.01				0.07				20.69	10	30	5	52.704	1.08	0.216	40	2.49724	113.515			10.1016/j.conbuildmat.2022.127493
synthetic slag A3-1	48.41	2.39		38.39	10.58	0.01				0.07				20.69	10	30	5	52.704	1.08	0.216	40	2.8859	124.723			10.1016/j.conbuildmat.2022.127493
synthetic slag A3-1	48.41	2.39		38.39	10.58	0.01				0.07				20.69	10	30	5	52.704	1.08	0.216	40	3.25796	134.638			10.1016/j.conbuildmat.2022.127493
synthetic slag A3-1	48.41	2.39		38.39	10.58	0.01				0.07				20.69	10	30	5	52.704	1.08	0.216	40	3.63207	143.65			10.1016/j.conbuildmat.2022.127493
synthetic slag A3-1	48.41	2.39		38.39	10.58	0.01				0.07				20.69	10	30	5	52.704	1.08	0.216	40	4.00207	151.927			10.1016/j.conbuildmat.2022.127493
synthetic slag A3-1	48.41	2.39		38.39	10.58	0.01				0.07				20.69	10	30	5	52.704	1.08	0.216	40	4.36748	159.373			10.1016/j.conbuildmat.2022.127493
synthetic slag A3-1	48.41	2.39		38.39	10.58	0.01				0.07				20.69	10	30	5	52.704	1.08	0.216	40	4.73142	166.285			10.1016/j.conbuildmat.2022.127493
synthetic slag A3-1	48.41	2.39		38.39	10.58	0.01				0.07				20.69	10	30	5	52.704	1.08	0.216	40	5.11361	173.088			10.1016/j.conbuildmat.2022.127493
synthetic slag A3-1	48.41	2.39		38.39	10.58	0.01				0.07				20.69	10	30	5	52.704	1.08	0.216	40	5.51422	179.62			10.1016/j.conbuildmat.2022.127493
synthetic slag A3-1	48.41	2.39		38.39	10.58	0.01				0.07				20.69	10	30	5	52.704	1.08	0.216	40	5.84529	184.733			10.1016/j.conbuildmat.2022.127493
synthetic slag A3-1	48.41	2.39		38.39	10.58	0.01				0.07				20.69	10	30	5	52.704	1.08	0.216	40	6.21934	190.34			10.1016/j.conbuildmat.2022.127493
synthetic slag A3-1	48.41	2.39		38.39	10.58	0.01				0.07				20.69	10	30	5	52.704	1.08	0.216	40	6.59951	195.529			10.1016/j.conbuildmat.2022.127493
synthetic slag A3-1	48.41	2.39		38.39	10.58	0.01				0.07				20.69	10	30	5	52.704	1.08	0.216	40	6.88209	199.204			10.1016/j.conbuildmat.2022.127493
synthetic slag A3-1	48.41	2.39		38.39	10.58	0.01				0.07				20.69	10	30	5	52.704	1.08	0.216	40	7	201.238			10.1016/j.conbuildmat.2022.127493
synthetic slag A12	39.11	12.32		37.32	9.43	0.03	0.7		0.21	0.24				20.35	10	30	5	52.704	1.08	0.216	40	0.0768299	15.3843			10.1016/j.conbuildmat.2022.127493
synthetic slag A12	39.11	12.32		37.32	9.43	0.03	0.7		0.21	0.24				20.35	10	30	5	52.704	1.08	0.216	40	0.597474	115.262			10.1016/j.conbuildmat.2022.127493
synthetic slag A12	39.11	12.32		37.32	9.43	0.03	0.7		0.21	0.24				20.35	10	30	5	52.704	1.08	0.216	40	1.02569	175.499			10.1016/j.conbuildmat.2022.127493
synthetic slag A12	39.11	12.32		37.32	9.43	0.03	0.7		0.21	0.24				20.35	10	30	5	52.704	1.08	0.216	40	1.32092	200.831			10.1016/j.conbuildmat.2022.127493
synthetic slag A12	39.11	12.32		37.32	9.43	0.03	0.7		0.21	0.24				20.35	10	30	5	52.704	1.08	0.216	40	1.70858	225.61			10.1016/j.conbuildmat.2022.127493
synthetic slag A12	39.11	12.32		37.32	9.43	0.03	0.7		0.21	0.24				20.35	10	30	5	52.704	1.08	0.216	40	2.05214	242.627			10.1016/j.conbuildmat.2022.127493
synthetic slag A12	39.11	12.32		37.32	9.43	0.03	0.7		0.21	0.24				20.35	10	30	5	52.704	1.08	0.216	40	2.4269	257.218			10.1016/j.conbuildmat.2022.127493
synthetic slag A12	39.11	12.32		37.32	9.43	0.03	0.7		0.21	0.24				20.35	10	30	5	52.704	1.08	0.216	40	2.78364	268.38			10.1016/j.conbuildmat.2022.127493
synthetic slag A12	39.11	12.32		37.32	9.43	0.03	0.7		0.21	0.24				20.35	10	30	5	52.704	1.08	0.216	40	3.18525	278.735			10.1016/j.conbuildmat.2022.127493
synthetic slag A12	39.11	12.32		37.32	9.43	0.03	0.7		0.21	0.24				20.35	10	30	5	52.704	1.08	0.216	40	3.54782	286.442			10.1016/j.conbuildmat.2022.127493
synthetic slag A12	39.11	12.32		37.32	9.43	0.03	0.7		0.21	0.24				20.35	10	30	5	52.704	1.08	0.216	40	3.91495	293.303			10.1016/j.conbuildmat.2022.127493
synthetic slag A12	39.11	12.32		37.32	9.43	0.03	0.7		0.21	0.24				20.35	10	30	5	52.704	1.08	0.216	40	4.27396	299.006			10.1016/j.conbuildmat.2022.127493
synthetic slag A12	39.11	12.32		37.32	9.43	0.03	0.7		0.21	0.24				20.35	10	30	5	52.704	1.08	0.216	40	4.65598	304.345			10.1016/j.conbuildmat.2022.127493
synthetic slag A12	39.11	12.32		37.32	9.43	0.03	0.7		0.21	0.24				20.35	10	30	5	52.704	1.08	0.216	40	5.01431	308.859			10.1016/j.conbuildmat.2022.127493
synthetic slag A12	39.11	12.32		37.32	9.43	0.03	0.7		0.21	0.24				20.35	10	30	5	52.704	1.08	0.216	40	5.39313	313.075			10.1016/j.conbuildmat.2022.127493
synthetic slag A12	39.11	12.32		37.32	9.43	0.03	0.7		0.21	0.24				20.35	10	30	5	52.704	1.08	0.216	40	5.76159	316.728			10.1016/j.conbuildmat.2022.127493
synthetic slag A12	39.11	12.32		37.32	9.43	0.03	0.7		0.21	0.24				20.35	10	30	5	52.704	1.08	0.216	40	6.13535	319.963			10.1016/j.conbuildmat.2022.127493
synthetic slag A12	39.11	12.32		37.32	9.43	0.03	0.7		0.21	0.24				20.35	10	30	5	52.704	1.08	0.216	40	6.50086	322.851			10.1016/j.conbuildmat.2022.127493
synthetic slag A12	39.11	12.32		37.32	9.43	0.03	0.7		0.21	0.24				20.35	10	30	5	52.704	1.08	0.216	40	6.84611	325.316			10.1016/j.conbuildmat.2022.127493
synthetic slag A12	39.11	12.32		37.32	9.43	0.03	0.7		0.21	0.24				20.35	10	30	5	52.704	1.08	0.216	40	7	326.625			10.1016/j.conbuildmat.2022.127493
synthetic slag A18	34.43	18.19		36.87	7.98	0.03	0.84		0.41	0.37				20.85	10	30	5	52.704	1.08	0.216	40	0.250983	83.6281			10.1016/j.conbuildmat.2022.127493
synthetic slag A18	34.43	18.19		36.87	7.98	0.03	0.84		0.41	0.37				20.85	10	30	5	52.704	1.08	0.216	40	0.380388	128.295			10.1016/j.conbuildmat.2022.127493
synthetic slag A18	34.43	18.19		36.87	7.98	0.03	0.84		0.41	0.37				20.85	10	30	5	52.704	1.08	0.216	40	0.673666	200.211			10.1016/j.conbuildmat.2022.127493
synthetic slag A18	34.43	18.19		36.87	7.98	0.03	0.84		0.41	0.37				20.85	10	30	5	52.704	1.08	0.216	40	1.1163	270.41			10.1016/j.conbuildmat.2022.127493
synthetic slag A18	34.43	18.19		36.87	7.98	0.03	0.84		0.41	0.37				20.85	10	30	5	52.704	1.08	0.216	40	1.44586	305.065			10.1016/j.conbuildmat.2022.127493
synthetic slag A18	34.43	18.19		36.87	7.98	0.03	0.84		0.41	0.37				20.85	10	30	5	52.704	1.08	0.216	40	1.7432	327.102			10.1016/j.conbuildmat.2022.127493
synthetic slag A18	34.43	18.19		36.87	7.98	0.03	0.84		0.41	0.37				20.85	10	30	5	52.704	1.08	0.216	40	2.12675	349.85			10.1016/j.conbuildmat.2022.127493
synthetic slag A18	34.43	18.19		36.87	7.98	0.03	0.84		0.41	0.37				20.85	10	30	5	52.704	1.08	0.216	40	2.9703	386.993			10.1016/j.conbuildmat.2022.127493
synthetic slag A18	34.43	18.19		36.87	7.98	0.03	0.84		0.41	0.37				20.85	10	30	5	52.704	1.08	0.216	40	4.09685	420.404			10.1016/j.conbuildmat.2022.127493
synthetic slag A18	34.43	18.19		36.87	7.98	0.03	0.84		0.41	0.37				20.85	10	30	5	52.704	1.08	0.216	40	4.54208	428.046			10.1016/j.conbuildmat.2022.127493
synthetic slag A18	34.43	18.19		36.87	7.98	0.03	0.84		0.41	0.37				20.85	10	30	5	52.704	1.08	0.216	40	4.89687	435.688			10.1016/j.conbuildmat.2022.127493
synthetic slag A18	34.43	18.19		36.87	7.98	0.03	0.84		0.41	0.37				20.85	10	30	5	52.704	1.08	0.216	40	5.33588	441.73			10.1016/j.conbuildmat.2022.127493
synthetic slag A18	34.43	18.19		36.87	7.98	0.03	0.84		0.41	0.37				20.85	10	30	5	52.704	1.08	0.216	40	5.67149	446.707			10.1016/j.conbuildmat.2022.127493
synthetic slag A18	34.43	18.19		36.87	7.98	0.03	0.84		0.41	0.37				20.85	10	30	5	52.704	1.08	0.216	40	5.99077	449.728			10.1016/j.conbuildmat.2022.127493
synthetic slag A18	34.43	18.19		36.87	7.98	0.03	0.84		0.41	0.37				20.85	10	30	5	52.704	1.08	0.216	40	6.40559	453.638			10.1016/j.conbuildmat.2022.127493
synthetic slag A18	34.43	18.19		36.87	7.98	0.03	0.84		0.41	0.37				20.85	10	30	5	52.704	1.08	0.216	40	6.74543	455.77			10.1016/j.conbuildmat.2022.127493
synthetic slag A18	34.43	18.19		36.87	7.98	0.03	0.84		0.41	0.37				20.85	10	30	5	52.704	1.08	0.216	40	3.5395	405.573			10.1016/j.conbuildmat.2022.127493
synthetic slag A18	34.43	18.19		36.87	7.98	0.03	0.84		0.41	0.37				20.85	10	30	5	52.704	1.08	0.216	40	7	459.752			10.1016/j.conbuildmat.2022.127493
synthetic slag CS1	38.67	14.51		32.98	11.22	0.05	1.02		0.36	0.36				20.4	10	30	5	52.704	1.08	0.216	40	0.428763	83.9835			10.1016/j.conbuildmat.2022.127493
synthetic slag CS1	38.67	14.51		32.98	11.22	0.05	1.02		0.36	0.36				20.4	10	30	5	52.704	1.08	0.216	40	1.09858	186.067			10.1016/j.conbuildmat.2022.127493
synthetic slag CS1	38.67	14.51		32.98	11.22	0.05	1.02		0.36	0.36				20.4	10	30	5	52.704	1.08	0.216	40	1.4497	215.021			10.1016/j.conbuildmat.2022.127493
synthetic slag CS1	38.67	14.51		32.98	11.22	0.05	1.02		0.36	0.36				20.4	10	30	5	52.704	1.08	0.216	40	1.80883	238.184			10.1016/j.conbuildmat.2022.127493
synthetic slag CS1	38.67	14.51		32.98	11.22	0.05	1.02		0.36	0.36				20.4	10	30	5	52.704	1.08	0.216	40	2.24341	260.909			10.1016/j.conbuildmat.2022.127493
synthetic slag CS1	38.67	14.51		32.98	11.22	0.05	1.02		0.36	0.36				20.4	10	30	5	52.704	1.08	0.216	40	2.67098	279.563			10.1016/j.conbuildmat.2022.127493
synthetic slag CS1	38.67	14.51		32.98	11.22	0.05	1.02		0.36	0.36				20.4	10	30	5	52.704	1.08	0.216	40	3.10183	294.854			10.1016/j.conbuildmat.2022.127493
synthetic slag CS1	38.67	14.51		32.98	11.22	0.05	1.02		0.36	0.36				20.4	10	30	5	52.704	1.08	0.216	40	3.56275	308.788			10.1016/j.conbuildmat.2022.127493
synthetic slag CS1	38.67	14.51		32.98	11.22	0.05	1.02		0.36	0.36				20.4	10	30	5	52.704	1.08	0.216	40	3.8729	316.87			10.1016/j.conbuildmat.2022.127493
synthetic slag CS1	38.67	14.51		32.98	11.22	0.05	1.02		0.36	0.36				20.4	10	30	5	52.704	1.08	0.216	40	4.29512	326.726			10.1016/j.conbuildmat.2022.127493
synthetic slag CS1	38.67	14.51		32.98	11.22	0.05	1.02		0.36	0.36				20.4	10	30	5	52.704	1.08	0.216	40	4.72344	335.508			10.1016/j.conbuildmat.2022.127493
synthetic slag CS1	38.67	14.51		32.98	11.22	0.05	1.02		0.36	0.36				20.4	10	30	5	52.704	1.08	0.216	40	5.08445	342.002			10.1016/j.conbuildmat.2022.127493
synthetic slag CS1	38.67	14.51		32.98	11.22	0.05	1.02		0.36	0.36				20.4	10	30	5	52.704	1.08	0.216	40	5.63292	350.758			10.1016/j.conbuildmat.2022.127493
synthetic slag CS1	38.67	14.51		32.98	11.22	0.05	1.02		0.36	0.36				20.4	10	30	5	52.704	1.08	0.216	40	5.99781	355.893			10.1016/j.conbuildmat.2022.127493
synthetic slag CS1	38.67	14.51		32.98	11.22	0.05	1.02		0.36	0.36				20.4	10	30	5	52.704	1.08	0.216	40	6.37898	360.821			10.1016/j.conbuildmat.2022.127493
synthetic slag CS1	38.67	14.51		32.98	11.22	0.05	1.02		0.36	0.36				20.4	10	30	5	52.704	1.08	0.216	40	6.78131	365.687			10.1016/j.conbuildmat.2022.127493
synthetic slag CS1	38.67	14.51		32.98	11.22	0.05	1.02		0.36	0.36				20.4	10	30	5	52.704	1.08	0.216	40	7	368.421			10.1016/j.conbuildmat.2022.127493
synthetic slag CS2	42.84	17.12		28.05	9.67	0.08	0.89		0.32	0.31				20.11	10	30	5	52.704	1.08	0.216	40	0.209863	38.9023			10.1016/j.conbuildmat.2022.127493
synthetic slag CS2	42.84	17.12		28.05	9.67	0.08	0.89		0.32	0.31				20.11	10	30	5	52.704	1.08	0.216	40	0.43602	85.5238			10.1016/j.conbuildmat.2022.127493
synthetic slag CS2	42.84	17.12		28.05	9.67	0.08	0.89		0.32	0.31				20.11	10	30	5	52.704	1.08	0.216	40	0.583868	117.839			10.1016/j.conbuildmat.2022.127493
synthetic slag CS2	42.84	17.12		28.05	9.67	0.08	0.89		0.32	0.31				20.11	10	30	5	52.704	1.08	0.216	40	0.796661	154.253			10.1016/j.conbuildmat.2022.127493
synthetic slag CS2	42.84	17.12		28.05	9.67	0.08	0.89		0.32	0.31				20.11	10	30	5	52.704	1.08	0.216	40	1.14634	196.479			10.1016/j.conbuildmat.2022.127493
synthetic slag CS2	42.84	17.12		28.05	9.67	0.08	0.89		0.32	0.31				20.11	10	30	5	52.704	1.08	0.216	40	1.49201	227.991			10.1016/j.conbuildmat.2022.127493
synthetic slag CS2	42.84	17.12		28.05	9.67	0.08	0.89		0.32	0.31				20.11	10	30	5	52.704	1.08	0.216	40	1.86915	255.212			10.1016/j.conbuildmat.2022.127493
synthetic slag CS2	42.84	17.12		28.05	9.67	0.08	0.89		0.32	0.31				20.11	10	30	5	52.704	1.08	0.216	40	2.23456	276.859			10.1016/j.conbuildmat.2022.127493
synthetic slag CS2	42.84	17.12		28.05	9.67	0.08	0.89		0.32	0.31				20.11	10	30	5	52.704	1.08	0.216	40	2.70073	298.632			10.1016/j.conbuildmat.2022.127493
synthetic slag CS2	42.84	17.12		28.05	9.67	0.08	0.89		0.32	0.31				20.11	10	30	5	52.704	1.08	0.216	40	3.11789	314.892			10.1016/j.conbuildmat.2022.127493
synthetic slag CS2	42.84	17.12		28.05	9.67	0.08	0.89		0.32	0.31				20.11	10	30	5	52.704	1.08	0.216	40	3.56061	328.998			10.1016/j.conbuildmat.2022.127493
synthetic slag CS2	42.84	17.12		28.05	9.67	0.08	0.89		0.32	0.31				20.11	10	30	5	52.704	1.08	0.216	40	3.9547	340.124			10.1016/j.conbuildmat.2022.127493
synthetic slag CS2	42.84	17.12		28.05	9.67	0.08	0.89		0.32	0.31				20.11	10	30	5	52.704	1.08	0.216	40	4.42174	351.175			10.1016/j.conbuildmat.2022.127493
synthetic slag CS2	42.84	17.12		28.05	9.67	0.08	0.89		0.32	0.31				20.11	10	30	5	52.704	1.08	0.216	40	4.81679	359.396			10.1016/j.conbuildmat.2022.127493
synthetic slag CS2	42.84	17.12		28.05	9.67	0.08	0.89		0.32	0.31				20.11	10	30	5	52.704	1.08	0.216	40	5.20089	366.137			10.1016/j.conbuildmat.2022.127493
synthetic slag CS2	42.84	17.12		28.05	9.67	0.08	0.89		0.32	0.31				20.11	10	30	5	52.704	1.08	0.216	40	5.57352	372.264			10.1016/j.conbuildmat.2022.127493
synthetic slag CS2	42.84	17.12		28.05	9.67	0.08	0.89		0.32	0.31				20.11	10	30	5	52.704	1.08	0.216	40	5.97698	378.404			10.1016/j.conbuildmat.2022.127493
synthetic slag CS2	42.84	17.12		28.05	9.67	0.08	0.89		0.32	0.31				20.11	10	30	5	52.704	1.08	0.216	40	6.45106	384.707			10.1016/j.conbuildmat.2022.127493
synthetic slag CS2	42.84	17.12		28.05	9.67	0.08	0.89		0.32	0.31				20.11	10	30	5	52.704	1.08	0.216	40	6.79417	388.794			10.1016/j.conbuildmat.2022.127493
synthetic slag CS2	42.84	17.12		28.05	9.67	0.08	0.89		0.32	0.31				20.11	10	30	5	52.704	1.08	0.216	40	7	391.641			10.1016/j.conbuildmat.2022.127493
commercial slag S	37.82	13.58		37.4	8.11	0.93	1.22		0.28					20.94	10	30	5	52.704	1.08	0.216	40	0.0649087	19.9288			10.1016/j.conbuildmat.2022.127493
commercial slag S	37.82	13.58		37.4	8.11	0.93	1.22		0.28					20.94	10	30	5	52.704	1.08	0.216	40	0.212524	60.6906			10.1016/j.conbuildmat.2022.127493
commercial slag S	37.82	13.58		37.4	8.11	0.93	1.22		0.28					20.94	10	30	5	52.704	1.08	0.216	40	0.348385	101.901			10.1016/j.conbuildmat.2022.127493
commercial slag S	37.82	13.58		37.4	8.11	0.93	1.22		0.28					20.94	10	30	5	52.704	1.08	0.216	40	0.48215	140.693			10.1016/j.conbuildmat.2022.127493
commercial slag S	37.82	13.58		37.4	8.11	0.93	1.22		0.28					20.94	10	30	5	52.704	1.08	0.216	40	0.650082	176.787			10.1016/j.conbuildmat.2022.127493
commercial slag S	37.82	13.58		37.4	8.11	0.93	1.22		0.28					20.94	10	30	5	52.704	1.08	0.216	40	0.885914	215.944			10.1016/j.conbuildmat.2022.127493
commercial slag S	37.82	13.58		37.4	8.11	0.93	1.22		0.28					20.94	10	30	5	52.704	1.08	0.216	40	1.17385	253.2			10.1016/j.conbuildmat.2022.127493
commercial slag S	37.82	13.58		37.4	8.11	0.93	1.22		0.28					20.94	10	30	5	52.704	1.08	0.216	40	1.50701	290.037			10.1016/j.conbuildmat.2022.127493
commercial slag S	37.82	13.58		37.4	8.11	0.93	1.22		0.28					20.94	10	30	5	52.704	1.08	0.216	40	1.86528	324.217			10.1016/j.conbuildmat.2022.127493
commercial slag S	37.82	13.58		37.4	8.11	0.93	1.22		0.28					20.94	10	30	5	52.704	1.08	0.216	40	2.27401	354.063			10.1016/j.conbuildmat.2022.127493
commercial slag S	37.82	13.58		37.4	8.11	0.93	1.22		0.28					20.94	10	30	5	52.704	1.08	0.216	40	2.64169	376.33			10.1016/j.conbuildmat.2022.127493
commercial slag S	37.82	13.58		37.4	8.11	0.93	1.22		0.28					20.94	10	30	5	52.704	1.08	0.216	40	2.99902	394.402			10.1016/j.conbuildmat.2022.127493
commercial slag S	37.82	13.58		37.4	8.11	0.93	1.22		0.28					20.94	10	30	5	52.704	1.08	0.216	40	3.39787	411.341			10.1016/j.conbuildmat.2022.127493
commercial slag S	37.82	13.58		37.4	8.11	0.93	1.22		0.28					20.94	10	30	5	52.704	1.08	0.216	40	3.74959	424.94			10.1016/j.conbuildmat.2022.127493
commercial slag S	37.82	13.58		37.4	8.11	0.93	1.22		0.28					20.94	10	30	5	52.704	1.08	0.216	40	4.15681	438.168			10.1016/j.conbuildmat.2022.127493
commercial slag S	37.82	13.58		37.4	8.11	0.93	1.22		0.28					20.94	10	30	5	52.704	1.08	0.216	40	4.52462	448.448			10.1016/j.conbuildmat.2022.127493
commercial slag S	37.82	13.58		37.4	8.11	0.93	1.22		0.28					20.94	10	30	5	52.704	1.08	0.216	40	4.9087	458.072			10.1016/j.conbuildmat.2022.127493
commercial slag S	37.82	13.58		37.4	8.11	0.93	1.22		0.28					20.94	10	30	5	52.704	1.08	0.216	40	5.25628	466.021			10.1016/j.conbuildmat.2022.127493
commercial slag S	37.82	13.58		37.4	8.11	0.93	1.22		0.28					20.94	10	30	5	52.704	1.08	0.216	40	5.63158	473.279			10.1016/j.conbuildmat.2022.127493
commercial slag S	37.82	13.58		37.4	8.11	0.93	1.22		0.28					20.94	10	30	5	52.704	1.08	0.216	40	6.03632	480.203			10.1016/j.conbuildmat.2022.127493
commercial slag S	37.82	13.58		37.4	8.11	0.93	1.22		0.28					20.94	10	30	5	52.704	1.08	0.216	40	6.42945	485.966			10.1016/j.conbuildmat.2022.127493
commercial slag S	37.82	13.58		37.4	8.11	0.93	1.22		0.28					20.94	10	30	5	52.704	1.08	0.216	40	6.79778	490.925			10.1016/j.conbuildmat.2022.127493
commercial slag S	37.82	13.58		37.4	8.11	0.93	1.22		0.28					20.94	10	30	5	52.704	1.08	0.216	40	7	493.808			10.1016/j.conbuildmat.2022.127493
synthetic slag M0	42.99	13.3		43.16	0.33	0.01								24.35	10	30	5	52.704	1.08	0.216	40	7			7.45119	10.1016/j.conbuildmat.2022.127493
synthetic slag M8	37.79	14.51		37.04	8.83	0.01	0.7		0.25	0.24				22.73	10	30	5	52.704	1.08	0.216	40	7			7.65699	10.1016/j.conbuildmat.2022.127493
synthetic slag M16	32.99	15.05		34.09	16.07	0.01	0.73		0.21	0.22				22.29	10	30	5	52.704	1.08	0.216	40	7			7.94195	10.1016/j.conbuildmat.2022.127493
synthetic slag A3	43.3	3.69		42.07	10.83	0.01								19.67	10	30	5	52.704	1.08	0.216	40	7			5.06069	10.1016/j.conbuildmat.2022.127493
synthetic slag A3-1	48.41	2.39		38.39	10.58	0.01				0.07				20.69	10	30	5	52.704	1.08	0.216	40	7			5.25066	10.1016/j.conbuildmat.2022.127493
synthetic slag A12	39.11	12.32		37.32	9.43	0.03	0.7		0.21	0.24				20.35	10	30	5	52.704	1.08	0.216	40	7			7.13456	10.1016/j.conbuildmat.2022.127493
synthetic slag A18	34.43	18.19		36.87	7.98	0.03	0.84		0.41	0.37				20.85	10	30	5	52.704	1.08	0.216	40	7			7.78364	10.1016/j.conbuildmat.2022.127493
synthetic slag CS1	38.67	14.51		32.98	11.22	0.05	1.02		0.36	0.36				20.4	10	30	5	52.704	1.08	0.216	40	7			7.3562	10.1016/j.conbuildmat.2022.127493
synthetic slag CS2	42.84	17.12		28.05	9.67	0.08	0.89		0.32	0.31				20.11	10	30	5	52.704	1.08	0.216	40	7			7.53034	10.1016/j.conbuildmat.2022.127493
commercial slag S	37.82	13.58		37.4	8.11	0.93	1.22		0.28					20.94	10	30	5	52.704	1.08	0.216	40	7			7.89446	10.1016/j.conbuildmat.2022.127493
slag GGBS	30.2	13.1		45.8	7.38				0.41					14.14	11	33.33	5.56	60	1.2	0.24	40				1.93	10.1016/j.conbuildmat.2023.134559
fluorescent lamp glass powder FLG	65.5	2.09	0.21	6.09	3.44				1.47	19.6				11.4	11	33.33	5.56	60	1.2	0.24	40				1.25	10.1016/j.conbuildmat.2023.134559
soda-lime silica glass powder SSG	65.7	1.93	0.87	11.7	1.72				0.78	16.8				7.84	11	33.33	5.56	60	1.2	0.24	40				1.38	10.1016/j.conbuildmat.2023.134559
cathode ray tube CRT	51.8	2.18	0.26	0.77	0.29				8.81	8.51				10.02	11	33.33	5.56	60	1.2	0.24	40				0.93	10.1016/j.conbuildmat.2023.134559
Sugarcane bagasse ash SCBA	59.48	3.42	3.09	2.5	1.18	0.43	0.35		3.45	0.7	23.19	2.24	38.4	3.2	10	30	5	52.704	1.08	0.216	40	7		58.3		10.1016/j.matpr.2023.04.048
Sugarcane bagasse ash SCBA600	76.52	4.39	2.99	2.79	1.42	0.39	0.38		4.01	1.02	3.76	2.56	25.1	2.18	10	30	5	52.704	1.08	0.216	40	7		82.13		10.1016/j.matpr.2023.04.048
silica fume SF	91.49	0.19	0.18	0.73	0.35	0.12			0.61	0.17	6.04	2.21		4.96	10	30	5	52.704	1.08	0.216	40	7		142.19		10.1016/j.matpr.2023.04.048
metakaolin MK	50.09	41.67	3.57	0.18	0.18	0.1	0.58		0.2	0.03	2.75	2.59		8.59	10	30	5	52.704	1.08	0.216	40	7		195.98		10.1016/j.matpr.2023.04.048
silica fume SF	91.49	0.19	0.18	0.73	0.35	0.12			0.61	0.17	6.04	2.21		4.96	10	30	5	52.704	1.08	0.216	40	3	335.1			10.1016/j.matpr.2023.04.048
metakaolin MK	50.09	41.67	3.57	0.18	0.18	0.1	0.58		0.2	0.03	2.75	2.59		8.59	10	30	5	52.704	1.08	0.216	40	3	981.6			10.1016/j.matpr.2023.04.048
Sugarcane bagasse ash SCBA	59.48	3.42	3.09	2.5	1.18	0.43	0.35		3.45	0.7	23.19	2.24	38.4	3.2	10	30	5	52.704	1.08	0.216	40	3	123.62			10.1016/j.matpr.2023.04.048
Sugarcane bagasse ash SCBA600	76.52	4.39	2.99	2.79	1.42	0.39	0.38		4.01	1.02	3.76	2.56	25.1	2.18	10	30	5	52.704	1.08	0.216	40	3	136.09			10.1016/j.matpr.2023.04.048
silica fume SF	91.49	0.19	0.18	0.73	0.35	0.12			0.61	0.17	6.04	2.21		4.96	10	30	5	52.704	1.08	0.216	40	7	408.81			10.1016/j.matpr.2023.04.048
metakaolin MK	50.09	41.67	3.57	0.18	0.18	0.1	0.58		0.2	0.03	2.75	2.59		8.59	10	30	5	52.704	1.08	0.216	40	7	1014.09			10.1016/j.matpr.2023.04.048
Sugarcane bagasse ash SCBA	59.48	3.42	3.09	2.5	1.18	0.43	0.35		3.45	0.7	23.19	2.24	38.4	3.2	10	30	5	52.704	1.08	0.216	40	7	169.7			10.1016/j.matpr.2023.04.048
Sugarcane bagasse ash SCBA600	76.52	4.39	2.99	2.79	1.42	0.39	0.38		4.01	1.02	3.76	2.56	25.1	2.18	10	30	5	52.704	1.08	0.216	40	7	189.93			10.1016/j.matpr.2023.04.048
silica fume SF	91.49	0.19	0.18	0.73	0.35	0.12			0.61	0.17	6.04	2.21		4.96	10	30	5	52.704	1.08	0.216	40	7			7.1	10.1016/j.matpr.2023.04.048
metakaolin MK	50.09	41.67	3.57	0.18	0.18	0.1	0.58		0.2	0.03	2.75	2.59		8.59	10	30	5	52.704	1.08	0.216	40	7			16.22	10.1016/j.matpr.2023.04.048
Sugarcane bagasse ash SCBA	59.48	3.42	3.09	2.5	1.18	0.43	0.35		3.45	0.7	23.19	2.24	38.4	3.2	10	30	5	52.704	1.08	0.216	40	7			1.2	10.1016/j.matpr.2023.04.048
Sugarcane bagasse ash SCBA600	76.52	4.39	2.99	2.79	1.42	0.39	0.38		4.01	1.02	3.76	2.56	25.1	2.18	10	30	5	52.704	1.08	0.216	40	7			5.02	10.1016/j.matpr.2023.04.048
ordinary portland concrete	19.51	4.42	3.12	63.85	2.1	3.25	0.31		0.83	0.19	1.54	3.09		11.22	10	30	5	52.704	1.08	0.216	40					10.1016/j.matpr.2023.04.048
calcium hydroxide CH	0.1	0.07	0.04	74.6	0.6	0.01					24.5	2.24			10	30	5	52.704	1.08	0.216	40					10.1016/j.matpr.2023.04.048
calcite CC	0.11		0.04	54.96	0.15	0.03	0.01		0.01	0.06	42.5	2.71		7.71	10	30	5	52.704	1.08	0.216	40					10.1016/j.matpr.2023.04.048
fly ash	67.6	22.1	5.3	0.3	0.2		0.1		1.6	0.4	0.8		55	24.3	10	30	0	52.704	1.08	0.216	40	1		24.7289		10.1061/(ASCE)MT.1943-5533.0004607
Blend 3 of fly ash + slag at 2?1 ratio	55.8	22.4333	4.16667	11.4667	2.5	0	0.0666667	0	1.26667	0.366667	0.533333			24.3	10	30	0	52.704	1.08	0.216	40	1		29.9349		10.1061/(ASCE)MT.1943-5533.0004607
Slag	32.2	23.1	1.9	33.8	7.1				0.6	0.3			95	24.3	10	30	0	52.704	1.08	0.216	40	1		30.8026		10.1061/(ASCE)MT.1943-5533.0004607
fluidised bed combustion fly ash 1	52.9	21.5	7	4.3	0.8	1.2	1.7	0	3.3	0.4	6	2.681		37.9	10	30	5	52.704	1.08	0.216	40	7		39.9		10.1061/(ASCE)MT.1943-5533.0004607
Slag	32.2	23.1	1.9	33.8	7.1				0.6	0.3			55	24.3	10	30	0	52.704	1.08	0.216	40	7		39.9132		10.1061/(ASCE)MT.1943-5533.0004607
fly ash	67.6	22.1	5.3	0.3	0.2		0.1		1.6	0.4	0.8		67	24.3	10	30	0	52.704	1.08	0.216	40	7		41.6486		10.1061/(ASCE)MT.1943-5533.0004607
Slag	32.2	23.1	1.9	33.8	7.1				0.6	0.3			95	24.3	10	30	0	52.704	1.08	0.216	40	28		41.6486		10.1061/(ASCE)MT.1943-5533.0004607
Blend 1 of kaolinitic calcined clay 1 + limestone at 1?2 ratio	23.9333	17.2667	1.5	30.3667	1.26667	0.0666667	0.266667	0	0.2	0.333333	25.3333			12.68	10	30	0	52.704	1.08	0.216	40	1		43.3839		10.1061/(ASCE)MT.1943-5533.0004607
Blend 3 of fly ash + slag at 2?1 ratio	55.8	22.4333	4.16667	11.4667	2.5	0	0.0666667	0	1.26667	0.366667	0.533333			24.3	10	30	0	52.704	1.08	0.216	40	7		47.2885		10.1061/(ASCE)MT.1943-5533.0004607
ground bottom ash 3	42.9	16.6	7.5	23	4.6	0.4		0	0.4	1	1.4	3.001		13.3	10	30	5	52.704	1.08	0.216	40	7		53.5		10.1061/(ASCE)MT.1943-5533.0004607
Blend 3 of fly ash + slag at 2?1 ratio	55.8	22.4333	4.16667	11.4667	2.5	0	0.0666667	0	1.26667	0.366667	0.533333			24.3	10	30	0	52.704	1.08	0.216	40	28		55.9653		10.1061/(ASCE)MT.1943-5533.0004607
fluidised bed combustion fly ash 2	43	17	8.6	14.4	1.3	8	1.1	0	2.2	0.3	3.4	2.671		37.3	10	30	5	52.704	1.08	0.216	40	7		62.4		10.1061/(ASCE)MT.1943-5533.0004607
Blend 1 of calcined clay 1 + limestone at 2?1 ratio	36.7667	32.0333	1.5	15.2333	0.633333	0.133333	0.533333	0	0.1	0.166667	14.1667			12.68	10	30	0	52.704	1.08	0.216	40	1		63.3406		10.1061/(ASCE)MT.1943-5533.0004607
Blend 1 of kaolinitic calcined clay 1 + limestone at 1?2 ratio	23.9333	17.2667	1.5	30.3667	1.26667	0.0666667	0.266667	0	0.2	0.333333	25.3333			12.68	10	30	0	52.704	1.08	0.216	40	7		68.5466		10.1061/(ASCE)MT.1943-5533.0004607
Blend 1 of kaolinitic calcined clay 1 + limestone at 1?2 ratio	23.9333	17.2667	1.5	30.3667	1.26667	0.0666667	0.266667	0	0.2	0.333333	25.3333			12.68	10	30	0	52.704	1.08	0.216	40	28		73.3189		10.1061/(ASCE)MT.1943-5533.0004607
volcanic ash 3	70.4	12.8	2	1.9	1	0.1	0.2	0.1	4.1	2.8	3.2	2.501		8.9	10	30	5	52.704	1.08	0.216	40	7		73.7		10.1061/(ASCE)MT.1943-5533.0004607
ground bottom ash 1	47.6	20.1	24.1	2.8	0.9	0.1		0	1.9	0.7	0	2.893		11.8	10	30	5	52.704	1.08	0.216	40	7		74.5		10.1061/(ASCE)MT.1943-5533.0004607
ground bottom ash 2	57	17.9	5.8	11.5	2.5	1.2		0	1	0.3	1.1	2.689		13.4	10	30	5	52.704	1.08	0.216	40	7		75.7		10.1061/(ASCE)MT.1943-5533.0004607
fly ash	67.6	22.1	5.3	0.3	0.2		0.1		1.6	0.4	0.8		55	24.3	10	30	0	52.704	1.08	0.216	40	28		75.9219		10.1061/(ASCE)MT.1943-5533.0004607
volcanic ash 1	71.9	12.1	0.8	0.7	0.2	0.1		0.3	4.7	3.6	4.8	2.405		11.8	10	30	5	52.704	1.08	0.216	40	7		83.9		10.1061/(ASCE)MT.1943-5533.0004607
calcined clay 1	56	25	14.6	0.1	0.4	0	1.1	0	1.3	0.2	0.6	2.886		9.2	10	30	5	52.704	1.08	0.216	40	7		84.2		10.1061/(ASCE)MT.1943-5533.0004607
Blend 1 of calcined clay 1 + limestone at 2?1 ratio	36.7667	32.0333	1.5	15.2333	0.633333	0.133333	0.533333	0	0.1	0.166667	14.1667		95	12.68	10	30	0	52.704	1.08	0.216	40	7		86.3341		10.1061/(ASCE)MT.1943-5533.0004607
volcanic ash 2	72.4	11.5	1.3	0.8	0.3	0	0.1	0	5.2	2.4	4.2	2.417		6.3	10	30	5	52.704	1.08	0.216	40	7		86.8		10.1061/(ASCE)MT.1943-5533.0004607
Blend 1 of calcined clay 1 + limestone at 2?1 ratio	36.7667	32.0333	1.5	15.2333	0.633333	0.133333	0.533333	0	0.1	0.166667	14.1667			12.68	10	30	0	52.704	1.08	0.216	40	28		94.1432		10.1061/(ASCE)MT.1943-5533.0004607
kaolinitic calcined clay 2	56.3	36.7	3.5	0.1	0.1		2.4		0.2	0.2	1.6		67	12.68	10	30	0	52.704	1.08	0.216	40	1		105.423		10.1061/(ASCE)MT.1943-5533.0004607
calcined clay 2	56.3	34.9	2.7	0.3	0.3	0.1	2.1	0	1.2	0	1.7	2.752		26.8	10	30	5	52.704	1.08	0.216	40	7		111.6		10.1061/(ASCE)MT.1943-5533.0004607
kaolinitic calcined clay 2	56.3	36.7	3.5	0.1	0.1		2.4		0.2	0.2	1.6		78	12.68	10	30	0	52.704	1.08	0.216	40	7		120.174		10.1061/(ASCE)MT.1943-5533.0004607
kaolinitic calcined clay 1	49.6	46.8	1.5	0.1		0.2	0.8				3		78	12.68	10	30	0	52.704	1.08	0.216	40	1		126.247		10.1061/(ASCE)MT.1943-5533.0004607
kaolinitic calcined clay 2	56.3	36.7	3.5	0.1	0.1		2.4		0.2	0.2	1.6		67	12.68	10	30	0	52.704	1.08	0.216	40	28		127.115		10.1061/(ASCE)MT.1943-5533.0004607
kaolinitic calcined clay 1	49.6	46.8	1.5	0.1		0.2	0.8				3			12.68	10	30	0	52.704	1.08	0.216	40	7		133.623		10.1061/(ASCE)MT.1943-5533.0004607
kaolinitic calcined clay 1	49.6	46.8	1.5	0.1		0.2	0.8				3		78	12.68	10	30	0	52.704	1.08	0.216	40	28		143.601		10.1061/(ASCE)MT.1943-5533.0004607
calcined clay 3	54.4	36.8	0.7	0.1	0	0.1	3.1	0	0.3	0	4.2	2.659		9	10	30	5	52.704	1.08	0.216	40	7		159.2		10.1061/(ASCE)MT.1943-5533.0004607
kaolinitic calcined clay 1	49.6	46.8	1.5	0.1		0.2	0.8				3		78	12.68	10	30	0	52.704	1.08	0.216	40	1	425.4			10.1061/(ASCE)MT.1943-5533.0004607
kaolinitic calcined clay 2	56.3	36.7	3.5	0.1	0.1		2.4		0.2	0.2	1.6		67	12.68	10	30	0	52.704	1.08	0.216	40	1	364.6			10.1061/(ASCE)MT.1943-5533.0004607
fly ash	67.6	22.1	5.3	0.3	0.2		0.1		1.6	0.4	0.8		55	24.3	10	30	0	52.704	1.08	0.216	40	1	37.1			10.1061/(ASCE)MT.1943-5533.0004607
Slag	32.2	23.1	1.9	33.8	7.1				0.6	0.3			95	24.3	10	30	0	52.704	1.08	0.216	40	1	382.3			10.1061/(ASCE)MT.1943-5533.0004607
limestone powder	11.1	2.5	1.5	45.5	1.9				0.3	0.5	36.5			12.68	10	30	0	52.704	1.08	0.216	40	1	10.1			10.1061/(ASCE)MT.1943-5533.0004607
Blend 1 of calcined clay 1 + limestone at 2?1 ratio	36.7667	32.0333	1.5	15.2333	0.633333	0.133333	0.533333	0	0.1	0.166667	14.1667			12.68	10	30	0	52.704	1.08	0.216	40	1	339.79			10.1061/(ASCE)MT.1943-5533.0004607
Blend 1 of kaolinitic calcined clay 1 + limestone at 1?2 ratio	23.9333	17.2667	1.5	30.3667	1.26667	0.0666667	0.266667	0	0.2	0.333333	25.3333			12.68	10	30	0	52.704	1.08	0.216	40	1	276.77			10.1061/(ASCE)MT.1943-5533.0004607
Blend 3 of fly ash + slag at 2?1 ratio	55.8	22.4333	4.16667	11.4667	2.5	0	0.0666667	0	1.26667	0.366667	0.533333			24.3	10	30	0	52.704	1.08	0.216	40	1	179.5			10.1061/(ASCE)MT.1943-5533.0004607
kaolinitic calcined clay 1	49.6	46.8	1.5	0.1		0.2	0.8				3		78	12.68	10	30	0	52.704	1.08	0.216	40	3	522.3			10.1061/(ASCE)MT.1943-5533.0004607
kaolinitic calcined clay 2	56.3	36.7	3.5	0.1	0.1		2.4		0.2	0.2	1.6		67	12.68	10	30	0	52.704	1.08	0.216	40	3	451.5			10.1061/(ASCE)MT.1943-5533.0004607
fly ash	67.6	22.1	5.3	0.3	0.2		0.1		1.6	0.4	0.8		55	24.3	10	30	0	52.704	1.08	0.216	40	3	102.7			10.1061/(ASCE)MT.1943-5533.0004607
Slag	32.2	23.1	1.9	33.8	7.1				0.6	0.3			95	24.3	10	30	0	52.704	1.08	0.216	40	3	497.7			10.1061/(ASCE)MT.1943-5533.0004607
limestone powder	11.1	2.5	1.5	45.5	1.9				0.3	0.5	36.5			12.68	10	30	0	52.704	1.08	0.216	40	3	16.7			10.1061/(ASCE)MT.1943-5533.0004607
Blend 1 of calcined clay 1 + limestone at 2?1 ratio	36.7667	32.0333	1.5	15.2333	0.633333	0.133333	0.533333	0	0.1	0.166667	14.1667			12.68	10	30	0	52.704	1.08	0.216	40	3	404.8			10.1061/(ASCE)MT.1943-5533.0004607
Blend 1 of kaolinitic calcined clay 1 + limestone at 1?2 ratio	23.9333	17.2667	1.5	30.3667	1.26667	0.0666667	0.266667	0	0.2	0.333333	25.3333			12.68	10	30	0	52.704	1.08	0.216	40	3	342.7			10.1061/(ASCE)MT.1943-5533.0004607
Blend 3 of fly ash + slag at 2?1 ratio	55.8	22.4333	4.16667	11.4667	2.5	0	0.0666667	0	1.26667	0.366667	0.533333			24.3	10	30	0	52.704	1.08	0.216	40	3	313.9			10.1061/(ASCE)MT.1943-5533.0004607
kaolinitic calcined clay 1	49.6	46.8	1.5	0.1		0.2	0.8				3		78	12.68	10	30	0	52.704	1.08	0.216	40	7	564.4			10.1061/(ASCE)MT.1943-5533.0004607
kaolinitic calcined clay 2	56.3	36.7	3.5	0.1	0.1		2.4		0.2	0.2	1.6		67	12.68	10	30	0	52.704	1.08	0.216	40	7	480.5			10.1061/(ASCE)MT.1943-5533.0004607
fly ash	67.6	22.1	5.3	0.3	0.2		0.1		1.6	0.4	0.8		55	24.3	10	30	0	52.704	1.08	0.216	40	7	196.7			10.1061/(ASCE)MT.1943-5533.0004607
Slag	32.2	23.1	1.9	33.8	7.1				0.6	0.3			95	24.3	10	30	0	52.704	1.08	0.216	40	7	548.1			10.1061/(ASCE)MT.1943-5533.0004607
limestone powder	11.1	2.5	1.5	45.5	1.9				0.3	0.5	36.5			12.68	10	30	0	52.704	1.08	0.216	40	7	23.7			10.1061/(ASCE)MT.1943-5533.0004607
Blend 1 of calcined clay 1 + limestone at 2?1 ratio	36.7667	32.0333	1.5	15.2333	0.633333	0.133333	0.533333	0	0.1	0.166667	14.1667			12.68	10	30	0	52.704	1.08	0.216	40	7	429.42			10.1061/(ASCE)MT.1943-5533.0004607
Blend 1 of kaolinitic calcined clay 1 + limestone at 1?2 ratio	23.9333	17.2667	1.5	30.3667	1.26667	0.0666667	0.266667	0	0.2	0.333333	25.3333			12.68	10	30	0	52.704	1.08	0.216	40	7	364.76			10.1061/(ASCE)MT.1943-5533.0004607
Blend 3 of fly ash + slag at 2?1 ratio	55.8	22.4333	4.16667	11.4667	2.5	0	0.0666667	0	1.26667	0.366667	0.533333			24.3	10	30	0	52.704	1.08	0.216	40	7	408.6			10.1061/(ASCE)MT.1943-5533.0004607
kaolinitic calcined clay 1	49.6	46.8	1.5	0.1		0.2	0.8				3		78	12.68	10	30	0	52.704	1.08	0.216	40	1			4.68132	10.1061/(ASCE)MT.1943-5533.0004607
kaolinitic calcined clay 2	56.3	36.7	3.5	0.1	0.1		2.4		0.2	0.2	1.6		67	12.68	10	30	0	52.704	1.08	0.216	40	1			3.8022	10.1061/(ASCE)MT.1943-5533.0004607
fly ash	67.6	22.1	5.3	0.3	0.2		0.1		1.6	0.4	0.8		55	24.3	10	30	0	52.704	1.08	0.216	40	1			0.835165	10.1061/(ASCE)MT.1943-5533.0004607
Slag	32.2	23.1	1.9	33.8	7.1				0.6	0.3			95	24.3	10	30	0	52.704	1.08	0.216	40	1			4.02198	10.1061/(ASCE)MT.1943-5533.0004607
limestone powder	11.1	2.5	1.5	45.5	1.9				0.3	0.5	36.5			12.68	10	30	0	52.704	1.08	0.216	40	1			0.0659341	10.1061/(ASCE)MT.1943-5533.0004607
Blend 1 of calcined clay 1 + limestone at 2?1 ratio	36.7667	32.0333	1.5	15.2333	0.633333	0.133333	0.533333	0	0.1	0.166667	14.1667			12.68	10	30	0	52.704	1.08	0.216	40	1			3.12088	10.1061/(ASCE)MT.1943-5533.0004607
Blend 1 of kaolinitic calcined clay 1 + limestone at 1?2 ratio	23.9333	17.2667	1.5	30.3667	1.26667	0.0666667	0.266667	0	0.2	0.333333	25.3333			12.68	10	30	0	52.704	1.08	0.216	40	1			2.54945	10.1061/(ASCE)MT.1943-5533.0004607
Blend 3 of fly ash + slag at 2?1 ratio	55.8	22.4333	4.16667	11.4667	2.5	0	0.0666667	0	1.26667	0.366667	0.533333			24.3	10	30	0	52.704	1.08	0.216	40	1			1.84615	10.1061/(ASCE)MT.1943-5533.0004607
kaolinitic calcined clay 1	49.6	46.8	1.5	0.1		0.2	0.8				3		78	12.68	10	30	0	52.704	1.08	0.216	40	7			5.86813	10.1061/(ASCE)MT.1943-5533.0004607
kaolinitic calcined clay 2	56.3	36.7	3.5	0.1	0.1		2.4		0.2	0.2	1.6		67	12.68	10	30	0	52.704	1.08	0.216	40	7			5.38462	10.1061/(ASCE)MT.1943-5533.0004607
fly ash	67.6	22.1	5.3	0.3	0.2		0.1		1.6	0.4	0.8		55	24.3	10	30	0	52.704	1.08	0.216	40	7			1.89011	10.1061/(ASCE)MT.1943-5533.0004607
Slag	32.2	23.1	1.9	33.8	7.1				0.6	0.3			95	24.3	10	30	0	52.704	1.08	0.216	40	7			6.61538	10.1061/(ASCE)MT.1943-5533.0004607
limestone powder	11.1	2.5	1.5	45.5	1.9				0.3	0.5	36.5			12.68	10	30	0	52.704	1.08	0.216	40	7			0.0879121	10.1061/(ASCE)MT.1943-5533.0004607
Blend 1 of calcined clay 1 + limestone at 2?1 ratio	36.7667	32.0333	1.5	15.2333	0.633333	0.133333	0.533333	0	0.1	0.166667	14.1667			12.68	10	30	0	52.704	1.08	0.216	40	7			3.97802	10.1061/(ASCE)MT.1943-5533.0004607
Blend 1 of kaolinitic calcined clay 1 + limestone at 1?2 ratio	23.9333	17.2667	1.5	30.3667	1.26667	0.0666667	0.266667	0	0.2	0.333333	25.3333			12.68	10	30	0	52.704	1.08	0.216	40	7			3.64835	10.1061/(ASCE)MT.1943-5533.0004607
Blend 3 of fly ash + slag at 2?1 ratio	55.8	22.4333	4.16667	11.4667	2.5	0	0.0666667	0	1.26667	0.366667	0.533333			24.3	10	30	0	52.704	1.08	0.216	40	7			3.51648	10.1061/(ASCE)MT.1943-5533.0004607
calcined clay 1	56	25	14.6	0.1	0.4	0	1.1	0	1.3	0.2	0.6	2.886		9.2	10	30	5	52.704	1.08	0.216	40	3	347			10.1061/(ASCE)MT.1943-5533.0004607
calcined clay 2	56.3	34.9	2.7	0.3	0.3	0.1	2.1	0	1.2	0	1.7	2.752		26.8	10	30	5	52.704	1.08	0.216	40	3	523.2			10.1061/(ASCE)MT.1943-5533.0004607
calcined clay 3	54.4	36.8	0.7	0.1	0	0.1	3.1	0	0.3	0	4.2	2.659		9	10	30	5	52.704	1.08	0.216	40	3	595.6			10.1061/(ASCE)MT.1943-5533.0004607
volcanic ash 1	71.9	12.1	0.8	0.7	0.2	0.1		0.3	4.7	3.6	4.8	2.405		11.8	10	30	5	52.704	1.08	0.216	40	3	142.9			10.1061/(ASCE)MT.1943-5533.0004607
volcanic ash 2	72.4	11.5	1.3	0.8	0.3	0	0.1	0	5.2	2.4	4.2	2.417		6.3	10	30	5	52.704	1.08	0.216	40	3	191.8			10.1061/(ASCE)MT.1943-5533.0004607
volcanic ash 3	70.4	12.8	2	1.9	1	0.1	0.2	0.1	4.1	2.8	3.2	2.501		8.9	10	30	5	52.704	1.08	0.216	40	3	136.7			10.1061/(ASCE)MT.1943-5533.0004607
ground bottom ash 1	47.6	20.1	24.1	2.8	0.9	0.1		0	1.9	0.7	0	2.893		11.8	10	30	5	52.704	1.08	0.216	40	3	194			10.1061/(ASCE)MT.1943-5533.0004607
ground bottom ash 2	57	17.9	5.8	11.5	2.5	1.2		0	1	0.3	1.1	2.689		13.4	10	30	5	52.704	1.08	0.216	40	3	200.1			10.1061/(ASCE)MT.1943-5533.0004607
ground bottom ash 3	42.9	16.6	7.5	23	4.6	0.4		0	0.4	1	1.4	3.001		13.3	10	30	5	52.704	1.08	0.216	40	3	151.5			10.1061/(ASCE)MT.1943-5533.0004607
fluidised bed combustion fly ash 1	52.9	21.5	7	4.3	0.8	1.2	1.7	0	3.3	0.4	6	2.681		37.9	10	30	5	52.704	1.08	0.216	40	3	140.8			10.1061/(ASCE)MT.1943-5533.0004607
fluidised bed combustion fly ash 2	43	17	8.6	14.4	1.3	8	1.1	0	2.2	0.3	3.4	2.671		37.3	10	30	5	52.704	1.08	0.216	40	3	199.6			10.1061/(ASCE)MT.1943-5533.0004607
calcined clay 1	56	25	14.6	0.1	0.4	0	1.1	0	1.3	0.2	0.6	2.886		9.2	10	30	5	52.704	1.08	0.216	40	7	374.7			10.1061/(ASCE)MT.1943-5533.0004607
calcined clay 2	56.3	34.9	2.7	0.3	0.3	0.1	2.1	0	1.2	0	1.7	2.752		26.8	10	30	5	52.704	1.08	0.216	40	7	776.9			10.1061/(ASCE)MT.1943-5533.0004607
calcined clay 3	54.4	36.8	0.7	0.1	0	0.1	3.1	0	0.3	0	4.2	2.659		9	10	30	5	52.704	1.08	0.216	40	7	647			10.1061/(ASCE)MT.1943-5533.0004607
volcanic ash 1	71.9	12.1	0.8	0.7	0.2	0.1		0.3	4.7	3.6	4.8	2.405		11.8	10	30	5	52.704	1.08	0.216	40	7	198.1			10.1061/(ASCE)MT.1943-5533.0004607
volcanic ash 2	72.4	11.5	1.3	0.8	0.3	0	0.1	0	5.2	2.4	4.2	2.417		6.3	10	30	5	52.704	1.08	0.216	40	7	269.9			10.1061/(ASCE)MT.1943-5533.0004607
volcanic ash 3	70.4	12.8	2	1.9	1	0.1	0.2	0.1	4.1	2.8	3.2	2.501		8.9	10	30	5	52.704	1.08	0.216	40	7	180.5			10.1061/(ASCE)MT.1943-5533.0004607
ground bottom ash 1	47.6	20.1	24.1	2.8	0.9	0.1		0	1.9	0.7	0	2.893		11.8	10	30	5	52.704	1.08	0.216	40	7	346.4			10.1061/(ASCE)MT.1943-5533.0004607
ground bottom ash 2	57	17.9	5.8	11.5	2.5	1.2		0	1	0.3	1.1	2.689		13.4	10	30	5	52.704	1.08	0.216	40	7	352.4			10.1061/(ASCE)MT.1943-5533.0004607
ground bottom ash 3	42.9	16.6	7.5	23	4.6	0.4		0	0.4	1	1.4	3.001		13.3	10	30	5	52.704	1.08	0.216	40	7	244.4			10.1061/(ASCE)MT.1943-5533.0004607
fluidised bed combustion fly ash 1	52.9	21.5	7	4.3	0.8	1.2	1.7	0	3.3	0.4	6	2.681		37.9	10	30	5	52.704	1.08	0.216	40	7	178.6			10.1061/(ASCE)MT.1943-5533.0004607
fluidised bed combustion fly ash 2	43	17	8.6	14.4	1.3	8	1.1	0	2.2	0.3	3.4	2.671		37.3	10	30	5	52.704	1.08	0.216	40	7	294.6			10.1061/(ASCE)MT.1943-5533.0004607
calcined clay 1	56	25	14.6	0.1	0.4	0	1.1	0	1.3	0.2	0.6	2.886		9.2	10	30	5	52.704	1.08	0.216	40	1			9.79931	10.1061/(ASCE)MT.1943-5533.0004607
calcined clay 2	56	25	14.6	0.1	0.4	0	1.1	0	1.3	0.2	0.6	2.886		9.2	10	30	5	52.704	1.08	0.216	40	3			10.3253	10.1061/(ASCE)MT.1943-5533.0004607
calcined clay 3	56	25	14.6	0.1	0.4	0	1.1	0	1.3	0.2	0.6	2.886		9.2	10	30	5	52.704	1.08	0.216	40	7			10.6298	10.1061/(ASCE)MT.1943-5533.0004607
calcined clay 4	56	25	14.6	0.1	0.4	0	1.1	0	1.3	0.2	0.6	2.886		9.2	10	30	5	52.704	1.08	0.216	40	14			10.9619	10.1061/(ASCE)MT.1943-5533.0004607
calcined clay 5	56	25	14.6	0.1	0.4	0	1.1	0	1.3	0.2	0.6	2.886		9.2	10	30	5	52.704	1.08	0.216	40	21			10.9896	10.1061/(ASCE)MT.1943-5533.0004607
calcined clay 6	56	25	14.6	0.1	0.4	0	1.1	0	1.3	0.2	0.6	2.886		9.2	10	30	5	52.704	1.08	0.216	40	28			11.1834	10.1061/(ASCE)MT.1943-5533.0004607
calcined clay 2	56.3	34.9	2.7	0.3	0.3	0.1	2.1	0	1.2	0	1.7	2.752		26.8	10	30	5	52.704	1.08	0.216	40	1			7.14187	10.1061/(ASCE)MT.1943-5533.0004607
calcined clay 3	56.3	34.9	2.7	0.3	0.3	0.1	2.1	0	1.2	0	1.7	2.752		26.8	10	30	5	52.704	1.08	0.216	40	3			9.41176	10.1061/(ASCE)MT.1943-5533.0004607
calcined clay 4	56.3	34.9	2.7	0.3	0.3	0.1	2.1	0	1.2	0	1.7	2.752		26.8	10	30	5	52.704	1.08	0.216	40	7			10.2976	10.1061/(ASCE)MT.1943-5533.0004607
calcined clay 5	56.3	34.9	2.7	0.3	0.3	0.1	2.1	0	1.2	0	1.7	2.752		26.8	10	30	5	52.704	1.08	0.216	40	14			10.9343	10.1061/(ASCE)MT.1943-5533.0004607
calcined clay 6	56.3	34.9	2.7	0.3	0.3	0.1	2.1	0	1.2	0	1.7	2.752		26.8	10	30	5	52.704	1.08	0.216	40	21			11.2388	10.1061/(ASCE)MT.1943-5533.0004607
calcined clay 7	56.3	34.9	2.7	0.3	0.3	0.1	2.1	0	1.2	0	1.7	2.752		26.8	10	30	5	52.704	1.08	0.216	40	28			11.4048	10.1061/(ASCE)MT.1943-5533.0004607
calcined clay 3	54.4	36.8	0.7	0.1	0	0.1	3.1	0	0.3	0	4.2	2.659		9	10	30	5	52.704	1.08	0.216	40	1			11.9862	10.1061/(ASCE)MT.1943-5533.0004607
calcined clay 4	54.4	36.8	0.7	0.1	0	0.1	3.1	0	0.3	0	4.2	2.659		9	10	30	5	52.704	1.08	0.216	40	3			13.8408	10.1061/(ASCE)MT.1943-5533.0004607
calcined clay 5	54.4	36.8	0.7	0.1	0	0.1	3.1	0	0.3	0	4.2	2.659		9	10	30	5	52.704	1.08	0.216	40	7			14.2007	10.1061/(ASCE)MT.1943-5533.0004607
calcined clay 6	54.4	36.8	0.7	0.1	0	0.1	3.1	0	0.3	0	4.2	2.659		9	10	30	5	52.704	1.08	0.216	40	14			14.5052	10.1061/(ASCE)MT.1943-5533.0004607
calcined clay 7	54.4	36.8	0.7	0.1	0	0.1	3.1	0	0.3	0	4.2	2.659		9	10	30	5	52.704	1.08	0.216	40	21			14.6713	10.1061/(ASCE)MT.1943-5533.0004607
calcined clay 8	54.4	36.8	0.7	0.1	0	0.1	3.1	0	0.3	0	4.2	2.659		9	10	30	5	52.704	1.08	0.216	40	28			14.699	10.1061/(ASCE)MT.1943-5533.0004607
volcanic ash 1	71.9	12.1	0.8	0.7	0.2	0.1		0.3	4.7	3.6	4.8	2.405		11.8	10	30	5	52.704	1.08	0.216	40	1			4.42907	10.1061/(ASCE)MT.1943-5533.0004607
volcanic ash 2	71.9	12.1	0.8	0.7	0.2	0.1		0.3	4.7	3.6	4.8	2.405		11.8	10	30	5	52.704	1.08	0.216	40	3			5.86851	10.1061/(ASCE)MT.1943-5533.0004607
volcanic ash 3	71.9	12.1	0.8	0.7	0.2	0.1		0.3	4.7	3.6	4.8	2.405		11.8	10	30	5	52.704	1.08	0.216	40	7			6.86505	10.1061/(ASCE)MT.1943-5533.0004607
volcanic ash 4	71.9	12.1	0.8	0.7	0.2	0.1		0.3	4.7	3.6	4.8	2.405		11.8	10	30	5	52.704	1.08	0.216	40	14			7.64014	10.1061/(ASCE)MT.1943-5533.0004607
volcanic ash 5	71.9	12.1	0.8	0.7	0.2	0.1		0.3	4.7	3.6	4.8	2.405		11.8	10	30	5	52.704	1.08	0.216	40	21			8.02768	10.1061/(ASCE)MT.1943-5533.0004607
volcanic ash 6	71.9	12.1	0.8	0.7	0.2	0.1		0.3	4.7	3.6	4.8	2.405		11.8	10	30	5	52.704	1.08	0.216	40	28			8.3045	10.1061/(ASCE)MT.1943-5533.0004607
volcanic ash 2	72.4	11.5	1.3	0.8	0.3	0	0.1	0	5.2	2.4	4.2	2.417		6.3	10	30	5	52.704	1.08	0.216	40	1			5.25952	10.1061/(ASCE)MT.1943-5533.0004607
volcanic ash 3	72.4	11.5	1.3	0.8	0.3	0	0.1	0	5.2	2.4	4.2	2.417		6.3	10	30	5	52.704	1.08	0.216	40	3			5.67474	10.1061/(ASCE)MT.1943-5533.0004607
volcanic ash 4	72.4	11.5	1.3	0.8	0.3	0	0.1	0	5.2	2.4	4.2	2.417		6.3	10	30	5	52.704	1.08	0.216	40	7			7.19723	10.1061/(ASCE)MT.1943-5533.0004607
volcanic ash 5	72.4	11.5	1.3	0.8	0.3	0	0.1	0	5.2	2.4	4.2	2.417		6.3	10	30	5	52.704	1.08	0.216	40	14			8.44291	10.1061/(ASCE)MT.1943-5533.0004607
volcanic ash 6	72.4	11.5	1.3	0.8	0.3	0	0.1	0	5.2	2.4	4.2	2.417		6.3	10	30	5	52.704	1.08	0.216	40	21			8.58131	10.1061/(ASCE)MT.1943-5533.0004607
volcanic ash 7	72.4	11.5	1.3	0.8	0.3	0	0.1	0	5.2	2.4	4.2	2.417		6.3	10	30	5	52.704	1.08	0.216	40	28			8.63668	10.1061/(ASCE)MT.1943-5533.0004607
volcanic ash 3	70.4	12.8	2	1.9	1	0.1	0.2	0.1	4.1	2.8	3.2	2.501		8.9	10	30	5	52.704	1.08	0.216	40	1			4.23529	10.1061/(ASCE)MT.1943-5533.0004607
volcanic ash 3	70.4	12.8	2	1.9	1	0.1	0.2	0.1	4.1	2.8	3.2	2.501		8.9	10	30	5	52.704	1.08	0.216	40	3			5.53633	10.1061/(ASCE)MT.1943-5533.0004607
volcanic ash 3	70.4	12.8	2	1.9	1	0.1	0.2	0.1	4.1	2.8	3.2	2.501		8.9	10	30	5	52.704	1.08	0.216	40	7			6.78201	10.1061/(ASCE)MT.1943-5533.0004607
volcanic ash 3	70.4	12.8	2	1.9	1	0.1	0.2	0.1	4.1	2.8	3.2	2.501		8.9	10	30	5	52.704	1.08	0.216	40	14			7.36332	10.1061/(ASCE)MT.1943-5533.0004607
volcanic ash 3	70.4	12.8	2	1.9	1	0.1	0.2	0.1	4.1	2.8	3.2	2.501		8.9	10	30	5	52.704	1.08	0.216	40	21			7.61246	10.1061/(ASCE)MT.1943-5533.0004607
volcanic ash 3	70.4	12.8	2	1.9	1	0.1	0.2	0.1	4.1	2.8	3.2	2.501		8.9	10	30	5	52.704	1.08	0.216	40	28			7.88927	10.1061/(ASCE)MT.1943-5533.0004607
ground bottom ash 1	47.6	20.1	24.1	2.8	0.9	0.1		0	1.9	0.7	0	2.893		11.8	10	30	5	52.704	1.08	0.216	40	1			3.65398	10.1061/(ASCE)MT.1943-5533.0004607
ground bottom ash 1	47.6	20.1	24.1	2.8	0.9	0.1		0	1.9	0.7	0	2.893		11.8	10	30	5	52.704	1.08	0.216	40	3			5.37024	10.1061/(ASCE)MT.1943-5533.0004607
ground bottom ash 1	47.6	20.1	24.1	2.8	0.9	0.1		0	1.9	0.7	0	2.893		11.8	10	30	5	52.704	1.08	0.216	40	7			6.80969	10.1061/(ASCE)MT.1943-5533.0004607
ground bottom ash 1	47.6	20.1	24.1	2.8	0.9	0.1		0	1.9	0.7	0	2.893		11.8	10	30	5	52.704	1.08	0.216	40	14			7.88927	10.1061/(ASCE)MT.1943-5533.0004607
ground bottom ash 1	47.6	20.1	24.1	2.8	0.9	0.1		0	1.9	0.7	0	2.893		11.8	10	30	5	52.704	1.08	0.216	40	21			8.35986	10.1061/(ASCE)MT.1943-5533.0004607
ground bottom ash 1	47.6	20.1	24.1	2.8	0.9	0.1		0	1.9	0.7	0	2.893		11.8	10	30	5	52.704	1.08	0.216	40	28			8.91349	10.1061/(ASCE)MT.1943-5533.0004607
ground bottom ash 2	57	17.9	5.8	11.5	2.5	1.2		0	1	0.3	1.1	2.689		13.4	10	30	5	52.704	1.08	0.216	40	1			3.79239	10.1061/(ASCE)MT.1943-5533.0004607
ground bottom ash 2	57	17.9	5.8	11.5	2.5	1.2		0	1	0.3	1.1	2.689		13.4	10	30	5	52.704	1.08	0.216	40	3			5.45329	10.1061/(ASCE)MT.1943-5533.0004607
ground bottom ash 2	57	17.9	5.8	11.5	2.5	1.2		0	1	0.3	1.1	2.689		13.4	10	30	5	52.704	1.08	0.216	40	7			6.36678	10.1061/(ASCE)MT.1943-5533.0004607
ground bottom ash 2	57	17.9	5.8	11.5	2.5	1.2		0	1	0.3	1.1	2.689		13.4	10	30	5	52.704	1.08	0.216	40	14			7.66782	10.1061/(ASCE)MT.1943-5533.0004607
ground bottom ash 2	57	17.9	5.8	11.5	2.5	1.2		0	1	0.3	1.1	2.689		13.4	10	30	5	52.704	1.08	0.216	40	21			8.13841	10.1061/(ASCE)MT.1943-5533.0004607
ground bottom ash 2	57	17.9	5.8	11.5	2.5	1.2		0	1	0.3	1.1	2.689		13.4	10	30	5	52.704	1.08	0.216	40	28			8.58131	10.1061/(ASCE)MT.1943-5533.0004607
ground bottom ash 3	42.9	16.6	7.5	23	4.6	0.4		0	0.4	1	1.4	3.001		13.3	10	30	5	52.704	1.08	0.216	40	1			3.6263	10.1061/(ASCE)MT.1943-5533.0004607
ground bottom ash 4	42.9	16.6	7.5	23	4.6	0.4		0	0.4	1	1.4	3.001		13.3	10	30	5	52.704	1.08	0.216	40	3			4.62284	10.1061/(ASCE)MT.1943-5533.0004607
ground bottom ash 5	42.9	16.6	7.5	23	4.6	0.4		0	0.4	1	1.4	3.001		13.3	10	30	5	52.704	1.08	0.216	40	7			5.48097	10.1061/(ASCE)MT.1943-5533.0004607
ground bottom ash 6	42.9	16.6	7.5	23	4.6	0.4		0	0.4	1	1.4	3.001		13.3	10	30	5	52.704	1.08	0.216	40	14			6.50519	10.1061/(ASCE)MT.1943-5533.0004607
ground bottom ash 7	42.9	16.6	7.5	23	4.6	0.4		0	0.4	1	1.4	3.001		13.3	10	30	5	52.704	1.08	0.216	40	21			6.89273	10.1061/(ASCE)MT.1943-5533.0004607
ground bottom ash 8	42.9	16.6	7.5	23	4.6	0.4		0	0.4	1	1.4	3.001		13.3	10	30	5	52.704	1.08	0.216	40	28			7.16955	10.1061/(ASCE)MT.1943-5533.0004607
fluidised bed combustion fly ash 1	52.9	21.5	7	4.3	0.8	1.2	1.7	0	3.3	0.4	6	2.681		37.9	10	30	5	52.704	1.08	0.216	40	1			3.98616	10.1061/(ASCE)MT.1943-5533.0004607
fluidised bed combustion fly ash 1	52.9	21.5	7	4.3	0.8	1.2	1.7	0	3.3	0.4	6	2.681		37.9	10	30	5	52.704	1.08	0.216	40	3			5.12111	10.1061/(ASCE)MT.1943-5533.0004607
fluidised bed combustion fly ash 1	52.9	21.5	7	4.3	0.8	1.2	1.7	0	3.3	0.4	6	2.681		37.9	10	30	5	52.704	1.08	0.216	40	7			6.00692	10.1061/(ASCE)MT.1943-5533.0004607
fluidised bed combustion fly ash 1	52.9	21.5	7	4.3	0.8	1.2	1.7	0	3.3	0.4	6	2.681		37.9	10	30	5	52.704	1.08	0.216	40	14			6.39446	10.1061/(ASCE)MT.1943-5533.0004607
fluidised bed combustion fly ash 1	52.9	21.5	7	4.3	0.8	1.2	1.7	0	3.3	0.4	6	2.681		37.9	10	30	5	52.704	1.08	0.216	40	21			6.47751	10.1061/(ASCE)MT.1943-5533.0004607
fluidised bed combustion fly ash 1	52.9	21.5	7	4.3	0.8	1.2	1.7	0	3.3	0.4	6	2.681		37.9	10	30	5	52.704	1.08	0.216	40	28			6.61592	10.1061/(ASCE)MT.1943-5533.0004607
fluidised bed combustion fly ash 2	43	17	8.6	14.4	1.3	8	1.1	0	2.2	0.3	3.4	2.671		37.3	10	30	5	52.704	1.08	0.216	40	1			4.01384	10.1061/(ASCE)MT.1943-5533.0004607
fluidised bed combustion fly ash 3	43	17	8.6	14.4	1.3	8	1.1	0	2.2	0.3	3.4	2.671		37.3	10	30	5	52.704	1.08	0.216	40	3			6.86505	10.1061/(ASCE)MT.1943-5533.0004607
fluidised bed combustion fly ash 4	43	17	8.6	14.4	1.3	8	1.1	0	2.2	0.3	3.4	2.671		37.3	10	30	5	52.704	1.08	0.216	40	7			8.33218	10.1061/(ASCE)MT.1943-5533.0004607
fluidised bed combustion fly ash 5	43	17	8.6	14.4	1.3	8	1.1	0	2.2	0.3	3.4	2.671		37.3	10	30	5	52.704	1.08	0.216	40	14			9.49481	10.1061/(ASCE)MT.1943-5533.0004607
fluidised bed combustion fly ash 6	43	17	8.6	14.4	1.3	8	1.1	0	2.2	0.3	3.4	2.671		37.3	10	30	5	52.704	1.08	0.216	40	21			9.79931	10.1061/(ASCE)MT.1943-5533.0004607
fluidised bed combustion fly ash 7	43	17	8.6	14.4	1.3	8	1.1	0	2.2	0.3	3.4	2.671		37.3	10	30	5	52.704	1.08	0.216	40	28			10.1592	10.1061/(ASCE)MT.1943-5533.0004607
portland cement Portland	18.29	3.79	3.32	60.15	4.53	3.29			0.39	0.12	5.89			9.15												10.1061/JMCEE7.MTENG-16884
granulated blast furnace slag GBFS	31.02	12.81	1.05	42.34	5.34	2.56			0.25	0.29	3.16			8.67												10.1061/JMCEE7.MTENG-16884
limestone powder LS-coarse	0.27	0.15	0.19	58.09	0.47	0.05				0.08	42.05			22.6	10	30	0	36	0	1.51	50	10		11.4146		10.1617/s11527-022-01980-2
limestone powderLS-medium	0.56	0.21	0.23	57.7	0.45	0.05				0.06	42.8			14.2	10	30	0	36	0	1.51	50	10		13.7561		10.1617/s11527-022-01980-2
limestone powder LS-fine	0.63	0.29	0.24	57.3	0.55	0.05				0.05	42.56			3.3	10	30	0	36	0	1.51	50	10		16.0976		10.1617/s11527-022-01980-2
glass powder GP-coarse	74.26	0.37	0.34	7.53	3.32	0.09				14.57	0.21			118.1	10	30	0	36	0	1.51	50	10		52.9756		10.1617/s11527-022-01980-2
pumice P-coarse	73.6	12.44	0.71	0.78	0.3	0.02				5.58	5.32			75.3	10	30	0	36	0	1.51	50	10		64.3902		10.1617/s11527-022-01980-2
glass powder GP-medium	73.47	0.5	0.08	8.19	2.58	0.09				14.04	0.74			35.2	10	30	0	36	0	1.51	50	10		78.7317		10.1617/s11527-022-01980-2
pumice P-medium	73.84	12.69	0.72	0.73	0.23	0.02				5.8	4.49			20.9	10	30	0	36	0	1.51	50	10		85.7561		10.1617/s11527-022-01980-2
glass powder GP-fine	73.39	0.55	0.09	7.86	2.67	0.1				14.06	1.04			13.2	10	30	0	36	0	1.51	50	10		100.683		10.1617/s11527-022-01980-2
pumice P-fine	72	12.37	0.72	0.74	0.28	0.02				5.65	5.83			5.2	10	30	0	36	0	1.51	50	10		116.488		10.1617/s11527-022-01980-2
ordinary portland concrete	21.78	4.88	2.96	63.76	1.31	1.74				0.35	2.74			16.2	10	30	0	36	0	1.51	50	10				10.1617/s11527-022-01980-2
limestone powder LS-fine	0.63	0.29	0.24	57.3	0.55	0.05				0.05	42.56			3.3	10	30	0	36	0	1.51	50	10	15.4			10.1617/s11527-022-01980-2
limestone powderLS-medium	0.56	0.21	0.23	57.7	0.45	0.05				0.06	42.8			14.2	10	30	0	36	0	1.51	50	10	15.4			10.1617/s11527-022-01980-2
limestone powder LS-coarse	0.27	0.15	0.19	58.09	0.47	0.05				0.08	42.05			22.6	10	30	0	36	0	1.51	50	10	16.8			10.1617/s11527-022-01980-2
pumice P-fine	72	12.37	0.72	0.74	0.28	0.02				5.65	5.83			5.2	10	30	0	36	0	1.51	50	10	275.8			10.1617/s11527-022-01980-2
pumice P-medium	73.84	12.69	0.72	0.73	0.23	0.02				5.8	4.49			20.9	10	30	0	36	0	1.51	50	10	210			10.1617/s11527-022-01980-2
pumice P-coarse	73.6	12.44	0.71	0.78	0.3	0.02				5.58	5.32			75.3	10	30	0	36	0	1.51	50	10	145.6			10.1617/s11527-022-01980-2
glass powder GP-fine	73.39	0.55	0.09	7.86	2.67	0.1				14.06	1.04			13.2	10	30	0	36	0	1.51	50	10	280			10.1617/s11527-022-01980-2
glass powder GP-medium	73.47	0.5	0.08	8.19	2.58	0.09				14.04	0.74			35.2	10	30	0	36	0	1.51	50	10	212.8			10.1617/s11527-022-01980-2
glass powder GP-coarse	74.26	0.37	0.34	7.53	3.32	0.09				14.57	0.21			118.1	10	30	0	36	0	1.51	50	10	102.2			10.1617/s11527-022-01980-2
Class F fly ash FA1	60.7	20.9	2.4	4.3	0.8	0.9			2.2	4.3	0.3			25.7	10	30	5	52.704	1.08	0.216	40					10.1617/s11527-022-02029-0
Class C fly ash FA2	46.1	16.6	3	18.5	2.3	4.1			1.1	0.3	0.7			22.4	10	30	5	52.704	1.08	0.216	40					10.1617/s11527-022-02029-0
Class F fly ash FA3	47.2	19	16.1	3.7	0.9	0.5			2.5	0.9	5.8			18.3	10	30	5	52.704	1.08	0.216	40					10.1617/s11527-022-02029-0
Class F fly ash FA4	52	14	5	11.9	4.3	0.6			2.1	3.6	0.2			24.6	10	30	5	52.704	1.08	0.216	40					10.1617/s11527-022-02029-0
Municipal solid waste incineration fly ash MFA	3.8	1.1	4.5	43.8	2.6	8.6			5.9	4.9	24.4			16.7	10	30	5	52.704	1.08	0.216	40					10.1617/s11527-022-02029-0
limestone powder LS	0.6	0.2	0.2	57.3	0.5	0.1			0.1		42.1			14.2	10	30	5	52.704	1.08	0.216	40					10.1617/s11527-022-02029-0
slag SL	32.1	12.9	0.7	42.4	6.5	3			0.3	0.1	2.7			11.1	10	30	5	52.704	1.08	0.216	40					10.1617/s11527-022-02029-0
metakaolin MK	51.5	44.1	1.4	0.1	0.2				0.2	0.1	0.4			4.2	10	30	5	52.704	1.08	0.216	40					10.1617/s11527-022-02029-0
Pure metakaolin MP	51.1	45.7	0.6	0.1	0	0.1			0.3	0.3				6.7	10	30	5	52.704	1.08	0.216	40	7		17.1		10.1617/s11527-022-02072-x
Impure metakaolin MI	54.6	36	2.9	0.4	0.3	0			1.4	0				19.5	10	30	5	52.704	1.08	0.216	40	7		25.1		10.1617/s11527-022-02072-x
Pure pumicite PP	74	13.1	2.1	0.3	0	0			4.3	4.4				5.2	10	30	5	52.704	1.08	0.216	40	7		29.6		10.1617/s11527-022-02072-x
Overburden, impure pumicite PI	64.9	11.8	2.5	1.1	0.3	0			4	3.8				5.9	10	30	5	52.704	1.08	0.216	40	7		30.5		10.1617/s11527-022-02072-x
Class F fly ash treated for SO3 FR-S	52.4	22.9	5.7	8.3	0.9	3.9			0.9	1.3				20.2	10	30	5	52.704	1.08	0.216	40	7		34.5		10.1617/s11527-022-02072-x
Class F fly ash FA	54.8	21.2	4.7	11.2	2.5	0.5			1	0.1				16.7	10	30	5	52.704	1.08	0.216	40	7		36.2		10.1617/s11527-022-02072-x
Class F fly ash FLP	51.1	19.3	5	14.1	3.8	0.7			1.4	0.7				11.6	10	30	5	52.704	1.08	0.216	40	7		36.5		10.1617/s11527-022-02072-x
Milled bottom ash MBA	54.4	21.6	5.4	11.1	2.4	0.3			0.9	0.1				32.8	10	30	5	52.704	1.08	0.216	40	7		36.6		10.1617/s11527-022-02072-x
Class F fly ash blended with milled bottom ash FBA	54.6	21.3	5	11.2	2.5	0.4			0.9	0.1				23.2	10	30	5	52.704	1.08	0.216	40	7		36.7		10.1617/s11527-022-02072-x
Class F fly ash with Class N natural pozzolan FR-N	62.6	18.8	4.1	2.9	0.6	0.2			2.5	2.4				18.1	10	30	5	52.704	1.08	0.216	40	7		37.6		10.1617/s11527-022-02072-x
Class F fly ash blended with Class C fly ash FC	46.6	20.3	5.1	17	4.2	0.9			0.8	0.9				14.4	10	30	5	52.704	1.08	0.216	40	7		37.7		10.1617/s11527-022-02072-x
Class C fly ash CA	39.7	19.6	5.3	21.9	5.7	1.4			0.6	1.5				12.4	10	30	5	52.704	1.08	0.216	40	7		38.4		10.1617/s11527-022-02072-x
Slag grade 100 S	35.2	10.6	1.5	39	10.7	2.6			0.5	0.3				8.6	10	30	5	52.704	1.08	0.216	40	7		42.5		10.1617/s11527-022-02072-x
Inert fine quartz powder Q	99.2	0.2	0.1	0.2	0	0.1			0	0				16.2	10	30	5	52.704	1.08	0.216	40	7		43.3		10.1617/s11527-022-02072-x
ordinary portland concrete OPC	20.5	5.6	1.9	64.7	1.4	3.3			0.9	0.2				13.4	10	30	5	52.704	1.08	0.216	40	7		50.1		10.1617/s11527-022-02072-x
ordinary portland concrete OPC	20.5	5.6	1.9	64.7	1.4	3.3			0.9	0.2				13.4	10	30	5	52.704	1.08	0.216	40	7	422			10.1617/s11527-022-02072-x
Inert fine quartz powder Q	99.2	0.2	0.1	0.2	0	0.1			0	0				16.2	10	30	5	52.704	1.08	0.216	40	7	21			10.1617/s11527-022-02072-x
Class C fly ash CA	39.7	19.6	5.3	21.9	5.7	1.4			0.6	1.5				12.4	10	30	5	52.704	1.08	0.216	40	7	316			10.1617/s11527-022-02072-x
Class F fly ash FA	54.8	21.2	4.7	11.2	2.5	0.5			1	0.1				16.7	10	30	5	52.704	1.08	0.216	40	7	262			10.1617/s11527-022-02072-x
Class F fly ash blended with milled bottom ash FBA	54.6	21.3	5	11.2	2.5	0.4			0.9	0.1				23.2	10	30	5	52.704	1.08	0.216	40	7	222			10.1617/s11527-022-02072-x
Class F fly ash blended with Class C fly ash FC	46.6	20.3	5.1	17	4.2	0.9			0.8	0.9				14.4	10	30	5	52.704	1.08	0.216	40	7	294			10.1617/s11527-022-02072-x
Class F fly ash FLP	51.1	19.3	5	14.1	3.8	0.7			1.4	0.7				11.6	10	30	5	52.704	1.08	0.216	40	7	280			10.1617/s11527-022-02072-x
Class F fly ash with Class N natural pozzolan FR-N	62.6	18.8	4.1	2.9	0.6	0.2			2.5	2.4				18.1	10	30	5	52.704	1.08	0.216	40	7	274			10.1617/s11527-022-02072-x
Class F fly ash treated for SO3 FR-S	52.4	22.9	5.7	8.3	0.9	3.9			0.9	1.3				20.2	10	30	5	52.704	1.08	0.216	40	7	201			10.1617/s11527-022-02072-x
Milled bottom ash MBA	54.4	21.6	5.4	11.1	2.4	0.3			0.9	0.1				32.8	10	30	5	52.704	1.08	0.216	40	7	164			10.1617/s11527-022-02072-x
Pure metakaolin MP	51.1	45.7	0.6	0.1	0	0.1			0.3	0.3				6.7	10	30	5	52.704	1.08	0.216	40	7	1030			10.1617/s11527-022-02072-x
Impure metakaolin MI	54.6	36	2.9	0.4	0.3	0			1.4	0				19.5	10	30	5	52.704	1.08	0.216	40	7	619			10.1617/s11527-022-02072-x
Pure pumicite PP	74	13.1	2.1	0.3	0	0			4.3	4.4				5.2	10	30	5	52.704	1.08	0.216	40	7	263			10.1617/s11527-022-02072-x
Overburden, impure pumicite PI	64.9	11.8	2.5	1.1	0.3	0			4	3.8				5.9	10	30	5	52.704	1.08	0.216	40	7	234			10.1617/s11527-022-02072-x
Slag grade 100 S	35.2	10.6	1.5	39	10.7	2.6			0.5	0.3				8.6	10	30	5	52.704	1.08	0.216	40	7	510			10.1617/s11527-022-02072-x
ordinary portland concrete OPC	20.5	5.6	1.9	64.7	1.4	3.3			0.9	0.2				13.4	10	30	5	52.704	1.08	0.216	40	7			6.8	10.1617/s11527-022-02072-x
Inert fine quartz powder Q	99.2	0.2	0.1	0.2	0	0.1			0	0				16.2	10	30	5	52.704	1.08	0.216	40	7			2	10.1617/s11527-022-02072-x
Class C fly ash CA	39.7	19.6	5.3	21.9	5.7	1.4			0.6	1.5				12.4	10	30	5	52.704	1.08	0.216	40	7			7.5	10.1617/s11527-022-02072-x
Class F fly ash FA	54.8	21.2	4.7	11.2	2.5	0.5			1	0.1				16.7	10	30	5	52.704	1.08	0.216	40	7			6.8	10.1617/s11527-022-02072-x
Class F fly ash blended with milled bottom ash FBA	54.6	21.3	5	11.2	2.5	0.4			0.9	0.1				23.2	10	30	5	52.704	1.08	0.216	40	7			6.4	10.1617/s11527-022-02072-x
Class F fly ash blended with Class C fly ash FC	46.6	20.3	5.1	17	4.2	0.9			0.8	0.9				14.4	10	30	5	52.704	1.08	0.216	40	7			7.3	10.1617/s11527-022-02072-x
Class F fly ash FLP	51.1	19.3	5	14.1	3.8	0.7			1.4	0.7				11.6	10	30	5	52.704	1.08	0.216	40	7			7.3	10.1617/s11527-022-02072-x
Class F fly ash with Class N natural pozzolan FR-N	62.6	18.8	4.1	2.9	0.6	0.2			2.5	2.4				18.1	10	30	5	52.704	1.08	0.216	40	7			6.7	10.1617/s11527-022-02072-x
Class F fly ash treated for SO3 FR-S	52.4	22.9	5.7	8.3	0.9	3.9			0.9	1.3				20.2	10	30	5	52.704	1.08	0.216	40	7			6.3	10.1617/s11527-022-02072-x
Milled bottom ash MBA	54.4	21.6	5.4	11.1	2.4	0.3			0.9	0.1				32.8	10	30	5	52.704	1.08	0.216	40	7			5.2	10.1617/s11527-022-02072-x
Pure metakaolin MP	51.1	45.7	0.6	0.1	0	0.1			0.3	0.3				6.7	10	30	5	52.704	1.08	0.216	40	7			16.9	10.1617/s11527-022-02072-x
Impure metakaolin MI	54.6	36	2.9	0.4	0.3	0			1.4	0				19.5	10	30	5	52.704	1.08	0.216	40	7			11.6	10.1617/s11527-022-02072-x
Pure pumicite PP	74	13.1	2.1	0.3	0	0			4.3	4.4				5.2	10	30	5	52.704	1.08	0.216	40	7			7.6	10.1617/s11527-022-02072-x
Overburden, impure pumicite PI	64.9	11.8	2.5	1.1	0.3	0			4	3.8				5.9	10	30	5	52.704	1.08	0.216	40	7			7.1	10.1617/s11527-022-02072-x
Slag grade 100 S	35.2	10.6	1.5	39	10.7	2.6			0.5	0.3				8.6	10	30	5	52.704	1.08	0.216	40	7			7.8	10.1617/s11527-022-02072-x
metakaolin MK1	68	53.5	42.5	0.5									68		100	37.77	0	60.43	1.48	0.32	40	0.0763889	13.7			10.1617/s11527-023-02217-6
metakaolin MK2	83	53	42.2	2.4	0.5		0.5		0.5	0.5	1.8		83		100	37.77	0	60.43	1.48	0.32	40	0.0763889	8.9			10.1617/s11527-023-02217-6
metakaolin MK3	98	52.3	45.2	0.5	0.5		0.5		0.5	0.5	1.7		98		100	37.77	0	60.43	1.48	0.32	40	0.0763889	7.6			10.1617/s11527-023-02217-6
metakaolin MK1	68	53.5	42.5	0.5									68		100	37.77	0	60.43	1.48	0.32	40	0.05	56.9			10.1617/s11527-023-02217-6
metakaolin MK2	83	53	42.2	2.4	0.5		0.5		0.5	0.5	1.8		83		100	37.77	0	60.43	1.48	0.32	40	0.05	68.1			10.1617/s11527-023-02217-6
metakaolin MK3	98	52.3	45.2	0.5	0.5		0.5		0.5	0.5	1.7		98		100	37.77	0	60.43	1.48	0.32	40	0.05	57.5			10.1617/s11527-023-02217-6
metakaolin MK1	68	53.5	42.5	0.5									68		100	37.77	0	60.43	1.48	0.32	40	0.0694444	69.7			10.1617/s11527-023-02217-6
metakaolin MK2	83	53	42.2	2.4	0.5		0.5		0.5	0.5	1.8		83		100	37.77	0	60.43	1.48	0.32	40	0.0694444	86.8			10.1617/s11527-023-02217-6
metakaolin MK3	98	52.3	45.2	0.5	0.5		0.5		0.5	0.5	1.7		98		100	37.77	0	60.43	1.48	0.32	40	0.0694444	77.8			10.1617/s11527-023-02217-6
metakaolin MK1	68	53.5	42.5	0.5									68		100	37.77	0	60.43	1.48	0.32	40	7	445.5			10.1617/s11527-023-02217-6
metakaolin MK2	83	53	42.2	2.4	0.5		0.5		0.5	0.5	1.8		83		100	37.77	0	60.43	1.48	0.32	40	7	764.8			10.1617/s11527-023-02217-6
metakaolin MK3	98	52.3	45.2	0.5	0.5		0.5		0.5	0.5	1.7		98		100	37.77	0	60.43	1.48	0.32	40	7	1003.8			10.1617/s11527-023-02217-6
metakaolin MK3	98	52.3	45.2	0.5	0.5		0.5		0.5	0.5	1.7		98		100	37.77	0	61.34	0	0.32	40	0.0763889	10.9			10.1617/s11527-023-02217-6
metakaolin MK3	98	52.3	45.2	0.5	0.5		0.5		0.5	0.5	1.7		98		100	37.77	0	61.34	0	0.32	40	0.05	58.7			10.1617/s11527-023-02217-6
metakaolin MK3	98	52.3	45.2	0.5	0.5		0.5		0.5	0.5	1.7		98		100	37.77	0	61.34	0	0.32	40	0.0694444	69.1			10.1617/s11527-023-02217-6
metakaolin MK3	98	52.3	45.2	0.5	0.5		0.5		0.5	0.5	1.7		98		100	37.77	0	61.34	0	0.32	40	7	933			10.1617/s11527-023-02217-6
sugarcane bagasse ash BA3	66.6	4.1	2	4.5	3.4				11.6	0.5	2.7	2.2		141	10	30	0	36	0	1.51	23	7		22		10.17756/nwj.2023-s2-007
rice husk ash + sugarcane bagasse ash BA1	79.9	1.8	0.9	0.9	1.1				3.8	0.3	8.7	2.1		166	10	30	0	36	0	1.51	23	7		40		10.17756/nwj.2023-s2-007
rice husk ash + sugarcane bagasse ash BA2	73.1	1	1.3	2.1	0.9				3.8	0.2	13.7	2.07		171	10	30	0	36	0	1.51	23	7		41		10.17756/nwj.2023-s2-007
ground granulated blast furnace slag S1	38.2	12.1	0.3	34.7	10.3	0.3	0.6	1.8	1.3	0.4		2.94		53	10	30	5	52.704	1.08	0.216	40	1.28	158.94			10.2139/ssrn.4448823
ground granulated blast furnace slag S2	35.4	11.7	0.5	42.5	6.4	1.2	0.6	0.2	0.3	0.3	0.1	2.86		41	10	30	5	52.704	1.08	0.216	40	1.28	277.263			10.2139/ssrn.4448823
ground granulated blast furnace slag S3	39.8	12	0.8	34.6	7.3	0.4	1.4	1.6	1	0.2	0	2.93		26	10	30	5	52.704	1.08	0.216	40	1.28	145.695			10.2139/ssrn.4448823
ground granulated blast furnace slag S4	36.6	10.8	0.3	41.9	7.3	1.4	0.5	0.4	0.4	0.2	-0.9	2.85		36	10	30	5	52.704	1.08	0.216	40	1.28	226.932			10.2139/ssrn.4448823
ground granulated blast furnace slag S5	35.6	13.5	0.5	38.8	8.7	0.6	1.2	0.3	0.7	0.4	-0.5	2.94		31	10	30	5	52.704	1.08	0.216	40	1.28	94.4812			10.2139/ssrn.4448823
ground granulated blast furnace slag S1	38.2	12.1	0.3	34.7	10.3	0.3	0.6	1.8	1.3	0.4		2.94		53	10	30	5	52.704	1.08	0.216	40	2.45	233.996			10.2139/ssrn.4448823
ground granulated blast furnace slag S2	35.4	11.7	0.5	42.5	6.4	1.2	0.6	0.2	0.3	0.3	0.1	2.86		41	10	30	5	52.704	1.08	0.216	40	2.45	345.254			10.2139/ssrn.4448823
ground granulated blast furnace slag S3	39.8	12	0.8	34.6	7.3	0.4	1.4	1.6	1	0.2	0	2.93		26	10	30	5	52.704	1.08	0.216	40	2.45	205.74			10.2139/ssrn.4448823
ground granulated blast furnace slag S4	36.6	10.8	0.3	41.9	7.3	1.4	0.5	0.4	0.4	0.2	-0.9	2.85		36	10	30	5	52.704	1.08	0.216	40	2.45	301.104			10.2139/ssrn.4448823
ground granulated blast furnace slag S5	35.6	13.5	0.5	38.8	8.7	0.6	1.2	0.3	0.7	0.4	-0.5	2.94		31	10	30	5	52.704	1.08	0.216	40	2.45	143.929			10.2139/ssrn.4448823
ground granulated blast furnace slag S1	38.2	12.1	0.3	34.7	10.3	0.3	0.6	1.8	1.3	0.4		2.94		53	10	30	5	52.704	1.08	0.216	40	3.7	281.678			10.2139/ssrn.4448823
ground granulated blast furnace slag S2	35.4	11.7	0.5	42.5	6.4	1.2	0.6	0.2	0.3	0.3	0.1	2.86		41	10	30	5	52.704	1.08	0.216	40	3.7	374.393			10.2139/ssrn.4448823
ground granulated blast furnace slag S3	39.8	12	0.8	34.6	7.3	0.4	1.4	1.6	1	0.2	0	2.93		26	10	30	5	52.704	1.08	0.216	40	3.7	237.528			10.2139/ssrn.4448823
ground granulated blast furnace slag S4	36.6	10.8	0.3	41.9	7.3	1.4	0.5	0.4	0.4	0.2	-0.9	2.85		36	10	30	5	52.704	1.08	0.216	40	3.7	335.541			10.2139/ssrn.4448823
ground granulated blast furnace slag S5	35.6	13.5	0.5	38.8	8.7	0.6	1.2	0.3	0.7	0.4	-0.5	2.94		31	10	30	5	52.704	1.08	0.216	40	3.7	173.951			10.2139/ssrn.4448823
ground granulated blast furnace slag S1	38.2	12.1	0.3	34.7	10.3	0.3	0.6	1.8	1.3	0.4		2.94		53	10	30	5	52.704	1.08	0.216	40	4.82	301.104			10.2139/ssrn.4448823
ground granulated blast furnace slag S2	35.4	11.7	0.5	42.5	6.4	1.2	0.6	0.2	0.3	0.3	0.1	2.86		41	10	30	5	52.704	1.08	0.216	40	4.82	385.872			10.2139/ssrn.4448823
ground granulated blast furnace slag S3	39.8	12	0.8	34.6	7.3	0.4	1.4	1.6	1	0.2	0	2.93		26	10	30	5	52.704	1.08	0.216	40	4.82	253.422			10.2139/ssrn.4448823
ground granulated blast furnace slag S4	36.6	10.8	0.3	41.9	7.3	1.4	0.5	0.4	0.4	0.2	-0.9	2.85		36	10	30	5	52.704	1.08	0.216	40	4.82	347.903			10.2139/ssrn.4448823
ground granulated blast furnace slag S5	35.6	13.5	0.5	38.8	8.7	0.6	1.2	0.3	0.7	0.4	-0.5	2.94		31	10	30	5	52.704	1.08	0.216	40	4.82	193.377			10.2139/ssrn.4448823
ground granulated blast furnace slag S1	38.2	12.1	0.3	34.7	10.3	0.3	0.6	1.8	1.3	0.4		2.94		53	10	30	5	52.704	1.08	0.216	40	7	315.232			10.2139/ssrn.4448823
ground granulated blast furnace slag S2	35.4	11.7	0.5	42.5	6.4	1.2	0.6	0.2	0.3	0.3	0.1	2.86		41	10	30	5	52.704	1.08	0.216	40	7	384.989			10.2139/ssrn.4448823
ground granulated blast furnace slag S3	39.8	12	0.8	34.6	7.3	0.4	1.4	1.6	1	0.2	0	2.93		26	10	30	5	52.704	1.08	0.216	40	7	270.199			10.2139/ssrn.4448823
ground granulated blast furnace slag S4	36.6	10.8	0.3	41.9	7.3	1.4	0.5	0.4	0.4	0.2	-0.9	2.85		36	10	30	5	52.704	1.08	0.216	40	7	351.435			10.2139/ssrn.4448823
ground granulated blast furnace slag S5	35.6	13.5	0.5	38.8	8.7	0.6	1.2	0.3	0.7	0.4	-0.5	2.94		31	10	30	5	52.704	1.08	0.216	40	7	209.272			10.2139/ssrn.4448823
ground granulated blast furnace slag S1	38.2	12.1	0.3	34.7	10.3	0.3	0.6	1.8	1.3	0.4		2.94		53	10	30	5	52.704	1.08	0.216	40	7			5.89474	10.2139/ssrn.4448823
ground granulated blast furnace slag S2	35.4	11.7	0.5	42.5	6.4	1.2	0.6	0.2	0.3	0.3	0.1	2.86		41	10	30	5	52.704	1.08	0.216	40	7			7.32632	10.2139/ssrn.4448823
ground granulated blast furnace slag S3	39.8	12	0.8	34.6	7.3	0.4	1.4	1.6	1	0.2	0	2.93		26	10	30	5	52.704	1.08	0.216	40	7			6.52632	10.2139/ssrn.4448823
ground granulated blast furnace slag S4	36.6	10.8	0.3	41.9	7.3	1.4	0.5	0.4	0.4	0.2	-0.9	2.85		36	10	30	5	52.704	1.08	0.216	40	7			6.94737	10.2139/ssrn.4448823
ground granulated blast furnace slag S5	35.6	13.5	0.5	38.8	8.7	0.6	1.2	0.3	0.7	0.4	-0.5	2.94		31	10	30	5	52.704	1.08	0.216	40	7			4.71579	10.2139/ssrn.4448823
nickel and copper tailings	47	2.3	13.3	12.8	22.9	0.3			0.1				2.26415	7.19142	10	30	0	36	0	1.51	50	10		37.265		10.21809/rilemtechlett.2021.143
nickel and copper tailings	47	2.3	13.3	12.8	22.9	0.3			0.1				10.4151	4.8147	10	30	0	36	0	1.51	50	10		44.2735		10.21809/rilemtechlett.2021.143
nickel and copper tailings	47	2.3	13.3	12.8	22.9	0.3			0.1				11.7736	3.54058	10	30	0	36	0	1.51	50	10		51.2821		10.21809/rilemtechlett.2021.143
nickel and copper tailings	47	2.3	13.3	12.8	22.9	0.3			0.1				12.9057	1.75191	10	30	0	36	0	1.51	50	10		59.3162		10.21809/rilemtechlett.2021.143
quartz tailings	45.8	22.1	8.6	16.5	4.9	0			0.3				13.8113	4.32466	10	30	0	36	0	1.51	50	10		59.6581		10.21809/rilemtechlett.2021.143
quartz tailings	45.8	22.1	8.6	16.5	4.9	0			0.3				17.8868	3.61409	10	30	0	36	0	1.51	50	10		63.7607		10.21809/rilemtechlett.2021.143
quartz tailings	45.8	22.1	8.6	16.5	4.9	0			0.3				22.9811	2.04594	10	30	0	36	0	1.51	50	10		65.1282		10.21809/rilemtechlett.2021.143
nickel and copper tailings	47	2.3	13.3	12.8	22.9	0.3			0.1				13.8113	1.18836	10	30	0	36	0	1.51	50	10		67.8632		10.21809/rilemtechlett.2021.143
quartz tailings	45.8	22.1	8.6	16.5	4.9	0			0.3				25.8113	0.992343	10	30	0	36	0	1.51	50	10		76.7521		10.21809/rilemtechlett.2021.143
quartz tailings	45.8	22.1	8.6	16.5	4.9	0			0.3				26.6038	0.894334	10	30	0	36	0	1.51	50	10		81.3675		10.21809/rilemtechlett.2021.143
nickel and copper tailings	47	2.3	13.3	12.8	22.9	0.3			0.1				2.26415	7.19142	10	30	0	36	0	1.51	50	10	32.1199			10.21809/rilemtechlett.2021.143
nickel and copper tailings	47	2.3	13.3	12.8	22.9	0.3			0.1				10.4151	4.8147	10	30	0	36	0	1.51	50	10	36.8308			10.21809/rilemtechlett.2021.143
nickel and copper tailings	47	2.3	13.3	12.8	22.9	0.3			0.1				11.7736	3.54058	10	30	0	36	0	1.51	50	10	53.9615			10.21809/rilemtechlett.2021.143
nickel and copper tailings	47	2.3	13.3	12.8	22.9	0.3			0.1				12.9057	1.75191	10	30	0	36	0	1.51	50	10	93.7901			10.21809/rilemtechlett.2021.143
nickel and copper tailings	47	2.3	13.3	12.8	22.9	0.3			0.1				13.8113	1.18836	10	30	0	36	0	1.51	50	10	118.201			10.21809/rilemtechlett.2021.143
quartz tailings	45.8	22.1	8.6	16.5	4.9	0			0.3				13.8113	4.32466	10	30	0	36	0	1.51	50	10	44.5396			10.21809/rilemtechlett.2021.143
quartz tailings	45.8	22.1	8.6	16.5	4.9	0			0.3				17.8868	3.61409	10	30	0	36	0	1.51	50	10	47.5375			10.21809/rilemtechlett.2021.143
quartz tailings	45.8	22.1	8.6	16.5	4.9	0			0.3				22.9811	2.04594	10	30	0	36	0	1.51	50	10	59.1006			10.21809/rilemtechlett.2021.143
quartz tailings	45.8	22.1	8.6	16.5	4.9	0			0.3				25.8113	0.992343	10	30	0	36	0	1.51	50	10	129.336			10.21809/rilemtechlett.2021.143
quartz tailings	45.8	22.1	8.6	16.5	4.9	0			0.3				26.6038	0.894334	10	30	0	36	0	1.51	50	10	156.317			10.21809/rilemtechlett.2021.143
quartz powder Quartz	99.2												3	10.9	11	33	5.56	60	1.2	0.24	40	7		5		10.3390/app11010366
fly ash FA	54.3	22.7	10.2	4.2									75	18.6	11	33	5.56	60	1.2	0.24	40	7		48		10.3390/app11010366
fly ash MFS	32.3	11	40.9	3.9									92	12	11	33	5.56	60	1.2	0.24	40	7		55		10.3390/app11010366
ground granulated blast furnace slag GGBFS	35.7	11.9	0.9	41.3									96.5	17.2	11	33	5.56	60	1.2	0.24	40	7		72		10.3390/app11010366
fly ash MFS	32.3	11	40.9	3.9									92	12	11	33	5.56	60	1.2	0.24	40	7			5.3	10.3390/app11010366
ground granulated blast furnace slag GGBFS	35.7	11.9	0.9	41.3									96.5	17.2	11	33	5.56	60	1.2	0.24	40	7			3.5	10.3390/app11010366
fly ash FA	54.3	22.7	10.2	4.2									75	18.6	11	33	5.56	60	1.2	0.24	40	7			7.4	10.3390/app11010366
quartz powder Quartz	99.2												3	10.9	11	33	5.56	60	1.2	0.24	40	7			0.3	10.3390/app11010366
fly ash MFS	32.3	11	40.9	3.9										12	11	33	5.56	60	1.2	0.24	40	0.122042	8.92035			10.3390/app11010366
fly ash MFS	32.3	11	40.9	3.9										12	11	33	5.56	60	1.2	0.24	40	0.256052	18.665			10.3390/app11010366
fly ash MFS	32.3	11	40.9	3.9										12	11	33	5.56	60	1.2	0.24	40	0.403462	26.7428			10.3390/app11010366
fly ash MFS	32.3	11	40.9	3.9										12	11	33	5.56	60	1.2	0.24	40	0.550873	33.282			10.3390/app11010366
fly ash MFS	32.3	11	40.9	3.9										12	11	33	5.56	60	1.2	0.24	40	0.698283	38.898			10.3390/app11010366
fly ash MFS	32.3	11	40.9	3.9										12	11	33	5.56	60	1.2	0.24	40	0.845694	44.4755			10.3390/app11010366
fly ash MFS	32.3	11	40.9	3.9										12	11	33	5.56	60	1.2	0.24	40	0.993104	49.3606			10.3390/app11010366
fly ash MFS	32.3	11	40.9	3.9										12	11	33	5.56	60	1.2	0.24	40	1.14051	54.3227			10.3390/app11010366
fly ash MFS	32.3	11	40.9	3.9										12	11	33	5.56	60	1.2	0.24	40	1.28793	59.3233			10.3390/app11010366
fly ash MFS	32.3	11	40.9	3.9										12	11	33	5.56	60	1.2	0.24	40	1.43534	64.3238			10.3390/app11010366
fly ash MFS	32.3	11	40.9	3.9										12	11	33	5.56	60	1.2	0.24	40	1.58275	69.4013			10.3390/app11010366
fly ash MFS	32.3	11	40.9	3.9										12	11	33	5.56	60	1.2	0.24	40	1.73016	74.2864			10.3390/app11010366
fly ash MFS	32.3	11	40.9	3.9										12	11	33	5.56	60	1.2	0.24	40	1.87757	79.4024			10.3390/app11010366
fly ash MFS	32.3	11	40.9	3.9										12	11	33	5.56	60	1.2	0.24	40	2.02498	84.4414			10.3390/app11010366
fly ash MFS	32.3	11	40.9	3.9										12	11	33	5.56	60	1.2	0.24	40	2.17239	89.3265			10.3390/app11010366
fly ash MFS	32.3	11	40.9	3.9										12	11	33	5.56	60	1.2	0.24	40	2.3198	94.2117			10.3390/app11010366
fly ash MFS	32.3	11	40.9	3.9										12	11	33	5.56	60	1.2	0.24	40	2.46721	99.0199			10.3390/app11010366
fly ash MFS	32.3	11	40.9	3.9										12	11	33	5.56	60	1.2	0.24	40	2.61462	103.751			10.3390/app11010366
fly ash MFS	32.3	11	40.9	3.9										12	11	33	5.56	60	1.2	0.24	40	2.76203	108.482			10.3390/app11010366
fly ash MFS	32.3	11	40.9	3.9										12	11	33	5.56	60	1.2	0.24	40	2.90944	113.098			10.3390/app11010366
fly ash MFS	32.3	11	40.9	3.9										12	11	33	5.56	60	1.2	0.24	40	3.05685	117.753			10.3390/app11010366
fly ash MFS	32.3	11	40.9	3.9										12	11	33	5.56	60	1.2	0.24	40	3.20426	122.176			10.3390/app11010366
fly ash MFS	32.3	11	40.9	3.9										12	11	33	5.56	60	1.2	0.24	40	3.35167	126.561			10.3390/app11010366
fly ash MFS	32.3	11	40.9	3.9										12	11	33	5.56	60	1.2	0.24	40	3.49908	130.869			10.3390/app11010366
fly ash MFS	32.3	11	40.9	3.9										12	11	33	5.56	60	1.2	0.24	40	3.64649	135.255			10.3390/app11010366
fly ash MFS	32.3	11	40.9	3.9										12	11	33	5.56	60	1.2	0.24	40	3.7939	139.447			10.3390/app11010366
fly ash MFS	32.3	11	40.9	3.9										12	11	33	5.56	60	1.2	0.24	40	3.94131	143.832			10.3390/app11010366
fly ash MFS	32.3	11	40.9	3.9										12	11	33	5.56	60	1.2	0.24	40	4.08873	147.948			10.3390/app11010366
fly ash MFS	32.3	11	40.9	3.9										12	11	33	5.56	60	1.2	0.24	40	4.23614	152.064			10.3390/app11010366
fly ash MFS	32.3	11	40.9	3.9										12	11	33	5.56	60	1.2	0.24	40	4.38355	155.564			10.3390/app11010366
fly ash MFS	32.3	11	40.9	3.9										12	11	33	5.56	60	1.2	0.24	40	4.53096	159.257			10.3390/app11010366
fly ash MFS	32.3	11	40.9	3.9										12	11	33	5.56	60	1.2	0.24	40	4.67837	163.258			10.3390/app11010366
fly ash MFS	32.3	11	40.9	3.9										12	11	33	5.56	60	1.2	0.24	40	4.82578	167.181			10.3390/app11010366
fly ash MFS	32.3	11	40.9	3.9										12	11	33	5.56	60	1.2	0.24	40	4.97319	170.989			10.3390/app11010366
fly ash MFS	32.3	11	40.9	3.9										12	11	33	5.56	60	1.2	0.24	40	5.1206	174.874			10.3390/app11010366
fly ash MFS	32.3	11	40.9	3.9										12	11	33	5.56	60	1.2	0.24	40	5.26801	178.567			10.3390/app11010366
fly ash MFS	32.3	11	40.9	3.9										12	11	33	5.56	60	1.2	0.24	40	5.41542	182.337			10.3390/app11010366
fly ash MFS	32.3	11	40.9	3.9										12	11	33	5.56	60	1.2	0.24	40	5.56283	186.029			10.3390/app11010366
fly ash MFS	32.3	11	40.9	3.9										12	11	33	5.56	60	1.2	0.24	40	5.71024	189.568			10.3390/app11010366
fly ash MFS	32.3	11	40.9	3.9										12	11	33	5.56	60	1.2	0.24	40	5.81075	191.991			10.3390/app11010366
fly ash FA	54.3	22.7	10.2	4.2										18.6	11	33	5.56	60	1.2	0.24	40	0.148844	6.24057			10.3390/app11010366
fly ash FA	54.3	22.7	10.2	4.2										18.6	11	33	5.56	60	1.2	0.24	40	0.296255	9.66402			10.3390/app11010366
fly ash FA	54.3	22.7	10.2	4.2										18.6	11	33	5.56	60	1.2	0.24	40	0.443665	13.3567			10.3390/app11010366
fly ash FA	54.3	22.7	10.2	4.2										18.6	11	33	5.56	60	1.2	0.24	40	0.591076	16.9725			10.3390/app11010366
fly ash FA	54.3	22.7	10.2	4.2										18.6	11	33	5.56	60	1.2	0.24	40	0.738486	20.6652			10.3390/app11010366
fly ash FA	54.3	22.7	10.2	4.2										18.6	11	33	5.56	60	1.2	0.24	40	0.885897	24.4733			10.3390/app11010366
fly ash FA	54.3	22.7	10.2	4.2										18.6	11	33	5.56	60	1.2	0.24	40	1.03331	28.3199			10.3390/app11010366
fly ash FA	54.3	22.7	10.2	4.2										18.6	11	33	5.56	60	1.2	0.24	40	1.18072	32.0895			10.3390/app11010366
fly ash FA	54.3	22.7	10.2	4.2										18.6	11	33	5.56	60	1.2	0.24	40	1.32813	35.7822			10.3390/app11010366
fly ash FA	54.3	22.7	10.2	4.2										18.6	11	33	5.56	60	1.2	0.24	40	1.47554	39.8211			10.3390/app11010366
fly ash FA	54.3	22.7	10.2	4.2										18.6	11	33	5.56	60	1.2	0.24	40	1.62295	43.9754			10.3390/app11010366
fly ash FA	54.3	22.7	10.2	4.2										18.6	11	33	5.56	60	1.2	0.24	40	1.77036	47.7066			10.3390/app11010366
fly ash FA	54.3	22.7	10.2	4.2										18.6	11	33	5.56	60	1.2	0.24	40	1.91777	51.3224			10.3390/app11010366
fly ash FA	54.3	22.7	10.2	4.2										18.6	11	33	5.56	60	1.2	0.24	40	2.06518	54.9766			10.3390/app11010366
fly ash FA	54.3	22.7	10.2	4.2										18.6	11	33	5.56	60	1.2	0.24	40	2.21259	58.5539			10.3390/app11010366
fly ash FA	54.3	22.7	10.2	4.2										18.6	11	33	5.56	60	1.2	0.24	40	2.36	62.2082			10.3390/app11010366
fly ash FA	54.3	22.7	10.2	4.2										18.6	11	33	5.56	60	1.2	0.24	40	2.50741	65.824			10.3390/app11010366
fly ash FA	54.3	22.7	10.2	4.2										18.6	11	33	5.56	60	1.2	0.24	40	2.65482	69.4782			10.3390/app11010366
fly ash FA	54.3	22.7	10.2	4.2										18.6	11	33	5.56	60	1.2	0.24	40	2.80223	72.9401			10.3390/app11010366
fly ash FA	54.3	22.7	10.2	4.2										18.6	11	33	5.56	60	1.2	0.24	40	2.94964	76.3636			10.3390/app11010366
fly ash FA	54.3	22.7	10.2	4.2										18.6	11	33	5.56	60	1.2	0.24	40	3.09705	79.7101			10.3390/app11010366
fly ash FA	54.3	22.7	10.2	4.2										18.6	11	33	5.56	60	1.2	0.24	40	3.24447	82.9797			10.3390/app11010366
fly ash FA	54.3	22.7	10.2	4.2										18.6	11	33	5.56	60	1.2	0.24	40	3.39188	86.0954			10.3390/app11010366
fly ash FA	54.3	22.7	10.2	4.2										18.6	11	33	5.56	60	1.2	0.24	40	3.53929	89.0957			10.3390/app11010366
fly ash FA	54.3	22.7	10.2	4.2										18.6	11	33	5.56	60	1.2	0.24	40	3.6867	91.9806			10.3390/app11010366
fly ash FA	54.3	22.7	10.2	4.2										18.6	11	33	5.56	60	1.2	0.24	40	3.83411	94.8656			10.3390/app11010366
fly ash FA	54.3	22.7	10.2	4.2										18.6	11	33	5.56	60	1.2	0.24	40	3.98152	97.5197			10.3390/app11010366
fly ash FA	54.3	22.7	10.2	4.2										18.6	11	33	5.56	60	1.2	0.24	40	4.12893	100.251			10.3390/app11010366
fly ash FA	54.3	22.7	10.2	4.2										18.6	11	33	5.56	60	1.2	0.24	40	4.27634	102.713			10.3390/app11010366
fly ash FA	54.3	22.7	10.2	4.2										18.6	11	33	5.56	60	1.2	0.24	40	4.42375	105.251			10.3390/app11010366
fly ash FA	54.3	22.7	10.2	4.2										18.6	11	33	5.56	60	1.2	0.24	40	4.57116	107.559			10.3390/app11010366
fly ash FA	54.3	22.7	10.2	4.2										18.6	11	33	5.56	60	1.2	0.24	40	4.71857	110.06			10.3390/app11010366
fly ash FA	54.3	22.7	10.2	4.2										18.6	11	33	5.56	60	1.2	0.24	40	4.86598	112.406			10.3390/app11010366
fly ash FA	54.3	22.7	10.2	4.2										18.6	11	33	5.56	60	1.2	0.24	40	5.01339	114.829			10.3390/app11010366
fly ash FA	54.3	22.7	10.2	4.2										18.6	11	33	5.56	60	1.2	0.24	40	5.1608	117.253			10.3390/app11010366
fly ash FA	54.3	22.7	10.2	4.2										18.6	11	33	5.56	60	1.2	0.24	40	5.30821	119.561			10.3390/app11010366
fly ash FA	54.3	22.7	10.2	4.2										18.6	11	33	5.56	60	1.2	0.24	40	5.45562	121.907			10.3390/app11010366
fly ash FA	54.3	22.7	10.2	4.2										18.6	11	33	5.56	60	1.2	0.24	40	5.60303	124.215			10.3390/app11010366
fly ash FA	54.3	22.7	10.2	4.2										18.6	11	33	5.56	60	1.2	0.24	40	5.75044	126.6			10.3390/app11010366
fly ash FA	54.3	22.7	10.2	4.2										18.6	11	33	5.56	60	1.2	0.24	40	5.83085	127.677			10.3390/app11010366
ground granulated blast furnace slag GGBFS	35.7	11.9	0.9	41.3										17.2	11	33	5.56	60	1.2	0.24	40	0.0684384	11.7412			10.3390/app11010366
ground granulated blast furnace slag GGBFS	35.7	11.9	0.9	41.3										17.2	11	33	5.56	60	1.2	0.24	40	0.108641	22.6013			10.3390/app11010366
ground granulated blast furnace slag GGBFS	35.7	11.9	0.9	41.3										17.2	11	33	5.56	60	1.2	0.24	40	0.148844	32.0511			10.3390/app11010366
ground granulated blast furnace slag GGBFS	35.7	11.9	0.9	41.3										17.2	11	33	5.56	60	1.2	0.24	40	0.189047	42.7702			10.3390/app11010366
ground granulated blast furnace slag GGBFS	35.7	11.9	0.9	41.3										17.2	11	33	5.56	60	1.2	0.24	40	0.22925	52.502			10.3390/app11010366
ground granulated blast furnace slag GGBFS	35.7	11.9	0.9	41.3										17.2	11	33	5.56	60	1.2	0.24	40	0.276153	63.3622			10.3390/app11010366
ground granulated blast furnace slag GGBFS	35.7	11.9	0.9	41.3										17.2	11	33	5.56	60	1.2	0.24	40	0.329757	74.046			10.3390/app11010366
ground granulated blast furnace slag GGBFS	35.7	11.9	0.9	41.3										17.2	11	33	5.56	60	1.2	0.24	40	0.383361	83.0374			10.3390/app11010366
ground granulated blast furnace slag GGBFS	35.7	11.9	0.9	41.3										17.2	11	33	5.56	60	1.2	0.24	40	0.443665	92.473			10.3390/app11010366
ground granulated blast furnace slag GGBFS	35.7	11.9	0.9	41.3										17.2	11	33	5.56	60	1.2	0.24	40	0.51737	102.713			10.3390/app11010366
ground granulated blast furnace slag GGBFS	35.7	11.9	0.9	41.3										17.2	11	33	5.56	60	1.2	0.24	40	0.597776	112.726			10.3390/app11010366
ground granulated blast furnace slag GGBFS	35.7	11.9	0.9	41.3										17.2	11	33	5.56	60	1.2	0.24	40	0.684882	122.66			10.3390/app11010366
ground granulated blast furnace slag GGBFS	35.7	11.9	0.9	41.3										17.2	11	33	5.56	60	1.2	0.24	40	0.778689	132.815			10.3390/app11010366
ground granulated blast furnace slag GGBFS	35.7	11.9	0.9	41.3										17.2	11	33	5.56	60	1.2	0.24	40	0.879196	142.222			10.3390/app11010366
ground granulated blast furnace slag GGBFS	35.7	11.9	0.9	41.3										17.2	11	33	5.56	60	1.2	0.24	40	0.993104	151.701			10.3390/app11010366
ground granulated blast furnace slag GGBFS	35.7	11.9	0.9	41.3										17.2	11	33	5.56	60	1.2	0.24	40	1.12711	160.603			10.3390/app11010366
ground granulated blast furnace slag GGBFS	35.7	11.9	0.9	41.3										17.2	11	33	5.56	60	1.2	0.24	40	1.27452	169.681			10.3390/app11010366
ground granulated blast furnace slag GGBFS	35.7	11.9	0.9	41.3										17.2	11	33	5.56	60	1.2	0.24	40	1.42193	177.644			10.3390/app11010366
ground granulated blast furnace slag GGBFS	35.7	11.9	0.9	41.3										17.2	11	33	5.56	60	1.2	0.24	40	1.56935	185.029			10.3390/app11010366
ground granulated blast furnace slag GGBFS	35.7	11.9	0.9	41.3										17.2	11	33	5.56	60	1.2	0.24	40	1.71676	191.376			10.3390/app11010366
ground granulated blast furnace slag GGBFS	35.7	11.9	0.9	41.3										17.2	11	33	5.56	60	1.2	0.24	40	1.86417	197.338			10.3390/app11010366
ground granulated blast furnace slag GGBFS	35.7	11.9	0.9	41.3										17.2	11	33	5.56	60	1.2	0.24	40	2.01158	202.608			10.3390/app11010366
ground granulated blast furnace slag GGBFS	35.7	11.9	0.9	41.3										17.2	11	33	5.56	60	1.2	0.24	40	2.15899	207.455			10.3390/app11010366
ground granulated blast furnace slag GGBFS	35.7	11.9	0.9	41.3										17.2	11	33	5.56	60	1.2	0.24	40	2.3064	211.724			10.3390/app11010366
ground granulated blast furnace slag GGBFS	35.7	11.9	0.9	41.3										17.2	11	33	5.56	60	1.2	0.24	40	2.45381	215.84			10.3390/app11010366
ground granulated blast furnace slag GGBFS	35.7	11.9	0.9	41.3										17.2	11	33	5.56	60	1.2	0.24	40	2.60122	219.456			10.3390/app11010366
ground granulated blast furnace slag GGBFS	35.7	11.9	0.9	41.3										17.2	11	33	5.56	60	1.2	0.24	40	2.74863	222.918			10.3390/app11010366
ground granulated blast furnace slag GGBFS	35.7	11.9	0.9	41.3										17.2	11	33	5.56	60	1.2	0.24	40	2.89604	226.149			10.3390/app11010366
ground granulated blast furnace slag GGBFS	35.7	11.9	0.9	41.3										17.2	11	33	5.56	60	1.2	0.24	40	3.04345	228.996			10.3390/app11010366
ground granulated blast furnace slag GGBFS	35.7	11.9	0.9	41.3										17.2	11	33	5.56	60	1.2	0.24	40	3.19086	231.88			10.3390/app11010366
ground granulated blast furnace slag GGBFS	35.7	11.9	0.9	41.3										17.2	11	33	5.56	60	1.2	0.24	40	3.33827	234.458			10.3390/app11010366
ground granulated blast furnace slag GGBFS	35.7	11.9	0.9	41.3										17.2	11	33	5.56	60	1.2	0.24	40	3.48568	237.073			10.3390/app11010366
ground granulated blast furnace slag GGBFS	35.7	11.9	0.9	41.3										17.2	11	33	5.56	60	1.2	0.24	40	3.63309	239.343			10.3390/app11010366
ground granulated blast furnace slag GGBFS	35.7	11.9	0.9	41.3										17.2	11	33	5.56	60	1.2	0.24	40	3.7805	241.728			10.3390/app11010366
ground granulated blast furnace slag GGBFS	35.7	11.9	0.9	41.3										17.2	11	33	5.56	60	1.2	0.24	40	3.92791	243.766			10.3390/app11010366
ground granulated blast furnace slag GGBFS	35.7	11.9	0.9	41.3										17.2	11	33	5.56	60	1.2	0.24	40	4.07532	245.997			10.3390/app11010366
ground granulated blast furnace slag GGBFS	35.7	11.9	0.9	41.3										17.2	11	33	5.56	60	1.2	0.24	40	4.22273	247.998			10.3390/app11010366
ground granulated blast furnace slag GGBFS	35.7	11.9	0.9	41.3										17.2	11	33	5.56	60	1.2	0.24	40	4.37015	249.959			10.3390/app11010366
ground granulated blast furnace slag GGBFS	35.7	11.9	0.9	41.3										17.2	11	33	5.56	60	1.2	0.24	40	4.51756	251.883			10.3390/app11010366
ground granulated blast furnace slag GGBFS	35.7	11.9	0.9	41.3										17.2	11	33	5.56	60	1.2	0.24	40	4.66497	253.729			10.3390/app11010366
ground granulated blast furnace slag GGBFS	35.7	11.9	0.9	41.3										17.2	11	33	5.56	60	1.2	0.24	40	4.81238	255.498			10.3390/app11010366
ground granulated blast furnace slag GGBFS	35.7	11.9	0.9	41.3										17.2	11	33	5.56	60	1.2	0.24	40	4.95979	257.306			10.3390/app11010366
ground granulated blast furnace slag GGBFS	35.7	11.9	0.9	41.3										17.2	11	33	5.56	60	1.2	0.24	40	5.1072	259.076			10.3390/app11010366
ground granulated blast furnace slag GGBFS	35.7	11.9	0.9	41.3										17.2	11	33	5.56	60	1.2	0.24	40	5.25461	260.73			10.3390/app11010366
ground granulated blast furnace slag GGBFS	35.7	11.9	0.9	41.3										17.2	11	33	5.56	60	1.2	0.24	40	5.40202	262.461			10.3390/app11010366
ground granulated blast furnace slag GGBFS	35.7	11.9	0.9	41.3										17.2	11	33	5.56	60	1.2	0.24	40	5.54943	264.153			10.3390/app11010366
ground granulated blast furnace slag GGBFS	35.7	11.9	0.9	41.3										17.2	11	33	5.56	60	1.2	0.24	40	5.69684	265.653			10.3390/app11010366
ground granulated blast furnace slag GGBFS	35.7	11.9	0.9	41.3										17.2	11	33	5.56	60	1.2	0.24	40	5.80405	266.884			10.3390/app11010366
quartz powder Quartz	99.2													10.9	11	33	5.56	60	1.2	0.24	40	0.470467	3.70183			10.3390/app11010366
quartz powder Quartz	99.2													10.9	11	33	5.56	60	1.2	0.24	40	0.845694	5.39432			10.3390/app11010366
quartz powder Quartz	99.2													10.9	11	33	5.56	60	1.2	0.24	40	0.993104	5.66358			10.3390/app11010366
quartz powder Quartz	99.2													10.9	11	33	5.56	60	1.2	0.24	40	1.14051	5.97131			10.3390/app11010366
quartz powder Quartz	99.2													10.9	11	33	5.56	60	1.2	0.24	40	1.28793	6.62523			10.3390/app11010366
quartz powder Quartz	99.2													10.9	11	33	5.56	60	1.2	0.24	40	1.43534	7.20221			10.3390/app11010366
quartz powder Quartz	99.2													10.9	11	33	5.56	60	1.2	0.24	40	1.58275	8.00999			10.3390/app11010366
quartz powder Quartz	99.2													10.9	11	33	5.56	60	1.2	0.24	40	1.73016	8.54851			10.3390/app11010366
quartz powder Quartz	99.2													10.9	11	33	5.56	60	1.2	0.24	40	1.87757	9.16396			10.3390/app11010366
quartz powder Quartz	99.2													10.9	11	33	5.56	60	1.2	0.24	40	2.02498	9.81788			10.3390/app11010366
quartz powder Quartz	99.2													10.9	11	33	5.56	60	1.2	0.24	40	2.17239	10.2795			10.3390/app11010366
quartz powder Quartz	99.2													10.9	11	33	5.56	60	1.2	0.24	40	2.3198	10.8949			10.3390/app11010366
quartz powder Quartz	99.2													10.9	11	33	5.56	60	1.2	0.24	40	2.46721	11.5104			10.3390/app11010366
quartz powder Quartz	99.2													10.9	11	33	5.56	60	1.2	0.24	40	2.61462	12.1258			10.3390/app11010366
quartz powder Quartz	99.2													10.9	11	33	5.56	60	1.2	0.24	40	2.76203	12.7028			10.3390/app11010366
quartz powder Quartz	99.2													10.9	11	33	5.56	60	1.2	0.24	40	2.90944	13.3567			10.3390/app11010366
quartz powder Quartz	99.2													10.9	11	33	5.56	60	1.2	0.24	40	3.05685	13.9337			10.3390/app11010366
quartz powder Quartz	99.2													10.9	11	33	5.56	60	1.2	0.24	40	3.20426	14.3184			10.3390/app11010366
quartz powder Quartz	99.2													10.9	11	33	5.56	60	1.2	0.24	40	3.35167	15.0492			10.3390/app11010366
quartz powder Quartz	99.2													10.9	11	33	5.56	60	1.2	0.24	40	3.49908	15.8185			10.3390/app11010366
quartz powder Quartz	99.2													10.9	11	33	5.56	60	1.2	0.24	40	3.64649	16.1263			10.3390/app11010366
quartz powder Quartz	99.2													10.9	11	33	5.56	60	1.2	0.24	40	3.7939	16.7417			10.3390/app11010366
quartz powder Quartz	99.2													10.9	11	33	5.56	60	1.2	0.24	40	3.94131	17.2802			10.3390/app11010366
quartz powder Quartz	99.2													10.9	11	33	5.56	60	1.2	0.24	40	4.08873	17.9341			10.3390/app11010366
quartz powder Quartz	99.2													10.9	11	33	5.56	60	1.2	0.24	40	4.23614	18.5111			10.3390/app11010366
quartz powder Quartz	99.2													10.9	11	33	5.56	60	1.2	0.24	40	4.38355	19.1266			10.3390/app11010366
quartz powder Quartz	99.2													10.9	11	33	5.56	60	1.2	0.24	40	4.53096	19.4728			10.3390/app11010366
quartz powder Quartz	99.2													10.9	11	33	5.56	60	1.2	0.24	40	4.67837	20.2036			10.3390/app11010366
quartz powder Quartz	99.2													10.9	11	33	5.56	60	1.2	0.24	40	4.82578	20.6267			10.3390/app11010366
quartz powder Quartz	99.2													10.9	11	33	5.56	60	1.2	0.24	40	4.97319	21.2037			10.3390/app11010366
quartz powder Quartz	99.2													10.9	11	33	5.56	60	1.2	0.24	40	5.1206	22.05			10.3390/app11010366
quartz powder Quartz	99.2													10.9	11	33	5.56	60	1.2	0.24	40	5.26801	22.5116			10.3390/app11010366
quartz powder Quartz	99.2													10.9	11	33	5.56	60	1.2	0.24	40	5.41542	23.127			10.3390/app11010366
quartz powder Quartz	99.2													10.9	11	33	5.56	60	1.2	0.24	40	5.56283	23.704			10.3390/app11010366
quartz powder Quartz	99.2													10.9	11	33	5.56	60	1.2	0.24	40	5.71024	24.2425			10.3390/app11010366
quartz powder Quartz	99.2													10.9	11	33	5.56	60	1.2	0.24	40	5.81745	24.5195			10.3390/app11010366
ordinary portland concrete OPC	19.55	4.89	3.01	63.91	1.5							3.09		9.95	10	30	5	60	1.2	0.24	40	7				10.3390/ma13235456
basic oxygen furnace slag SL_BOF	23.31	4.89	27.07	27.82	5.64		2.3					3.63		13.1	10	30	5	60	1.2	0.24	40	7			2.3	10.3390/ma13235456
ladle slag SL_LF	27.82	5.64	13.53	33.83	12.03		2.3					3.04		10.3	10	30	5	60	1.2	0.24	40	7			2.3	10.3390/ma13235456
iron silicate slag SL_AUR	34.59	5.64	51.88	3.01	1.13		1.7					2.4	40	9.5	10	30	5	60	1.2	0.24	40	7			1.7	10.3390/ma13235456
red mud RM	21.8	16.92	37.97	10.15	0.75		4.7					2.88		0.4	10	30	5	60	1.2	0.24	40	7			4.7	10.3390/ma13235456
coal combustion fly ash FA_T	53.38	19.55	9.02	11.28	2.63		7.2					2.08	90	15.2	10	30	5	60	1.2	0.24	40	7			7.2	10.3390/ma13235456
coal combustion fly ash FA_K	51.5	20.68	7.14	12.78	2.63		6.8					2.47	90	8.6	10	30	5	60	1.2	0.24	40	7			6.8	10.3390/ma13235456
silica fume SF_D	92.11	1.88	0.38	3.01	0.75		10.2					2.13	97	0.3	10	30	5	60	1.2	0.24	40	7			10.2	10.3390/ma13235456
stone quarry limestone LS	19.55	4.14	1.5	72.56	1.88							2.7		18	10	30	5	60	1.2	0.24	40					10.3390/ma13235456
calcined clay C_MAR	62.41	21.43	7.14	2.26	1.88		9.4					2.26		10.7	10	30	5	60	1.2	0.24	40	7			9.4	10.3390/ma13235456
calcined clay C_CU_1	61.65	21.05	7.14	2.26	2.63		10.2					2.59		23.8	10	30	5	60	1.2	0.24	40	7			10.2	10.3390/ma13235456
calcined clay C_CU_2	59.77	21.05	9.02	2.26	2.63		10.9					2.43		10.8	10	30	5	60	1.2	0.24	40	7			10.9	10.3390/ma13235456
calcined clay C_ILO	61.28	22.18	7.89	2.26	1.88		8.9					2.29		8.9	10	30	5	60	1.2	0.24	40	7			8.9	10.3390/ma13235456
calcined clay C_ORA	65.04	19.17	6.02	2.26	2.26		4.3					2.56		13	10	30	5	60	1.2	0.24	40	7			4.3	10.3390/ma13235456
calcined clay C_TOP_1	64.66	20.3	6.77	1.88	1.88		7.4					2.52		12.2	10	30	5	60	1.2	0.24	40	7			7.4	10.3390/ma13235456
calcined clay C_TOP_2	65.04	20.68	6.02	1.88	1.88		4.5					2.5		10	10	30	5	60	1.2	0.24	40	7			4.5	10.3390/ma13235456
calcined clay C_KaVa_1	63.16	25.19	3.01	1.88	1.5		5.6					2.57		8.6	10	30	5	60	1.2	0.24	40	7			5.6	10.3390/ma13235456
calcined clay C_KaVa_2	63.91	24.44	3.38	1.88	1.5		4.5					2.57		8.2	10	30	5	60	1.2	0.24	40	7			4.5	10.3390/ma13235456
calcined clay C_NC_1	63.91	19.92	6.77	2.26	2.26		4.8					2.12		13.4	10	30	5	60	1.2	0.24	40	7			4.8	10.3390/ma13235456
calcined clay C_NC_2	62.41	21.05	6.02	4.51	2.26		5.5					2.41		15.4	10	30	5	60	1.2	0.24	40	7			5.5	10.3390/ma13235456
calcined clay C_SlVk	64.29	19.55	6.39	2.26	2.26		4.1					2.5		14.1	10	30	5	60	1.2	0.24	40	7			4.1	10.3390/ma13235456
calcined clay C_IGM	64.29	19.92	6.39	2.26	1.88		4.4					2.57		15.4	10	30	5	60	1.2	0.24	40	7			4.4	10.3390/ma13235456
basic oxygen furnace slag SL_BOF	23.31	4.89	27.07	27.82	5.64							3.63		13.1	10	30	5	60	1.2	0.24	40	0.187027	7.82832			10.3390/ma13235456
basic oxygen furnace slag SL_BOF	23.31	4.89	27.07	27.82	5.64							3.63		13.1	10	30	5	60	1.2	0.24	40	0.374386	13.1641			10.3390/ma13235456
basic oxygen furnace slag SL_BOF	23.31	4.89	27.07	27.82	5.64							3.63		13.1	10	30	5	60	1.2	0.24	40	0.552738	16.9449			10.3390/ma13235456
basic oxygen furnace slag SL_BOF	23.31	4.89	27.07	27.82	5.64							3.63		13.1	10	30	5	60	1.2	0.24	40	0.731089	19.9921			10.3390/ma13235456
basic oxygen furnace slag SL_BOF	23.31	4.89	27.07	27.82	5.64							3.63		13.1	10	30	5	60	1.2	0.24	40	0.909441	22.4186			10.3390/ma13235456
basic oxygen furnace slag SL_BOF	23.31	4.89	27.07	27.82	5.64							3.63		13.1	10	30	5	60	1.2	0.24	40	1.08131	24.5122			10.3390/ma13235456
basic oxygen furnace slag SL_BOF	23.31	4.89	27.07	27.82	5.64							3.63		13.1	10	30	5	60	1.2	0.24	40	1.26614	26.4816			10.3390/ma13235456
basic oxygen furnace slag SL_BOF	23.31	4.89	27.07	27.82	5.64							3.63		13.1	10	30	5	60	1.2	0.24	40	1.43234	28.3297			10.3390/ma13235456
basic oxygen furnace slag SL_BOF	23.31	4.89	27.07	27.82	5.64							3.63		13.1	10	30	5	60	1.2	0.24	40	1.62285	30.0931			10.3390/ma13235456
basic oxygen furnace slag SL_BOF	23.31	4.89	27.07	27.82	5.64							3.63		13.1	10	30	5	60	1.2	0.24	40	1.8012	31.7296			10.3390/ma13235456
basic oxygen furnace slag SL_BOF	23.31	4.89	27.07	27.82	5.64							3.63		13.1	10	30	5	60	1.2	0.24	40	1.97955	33.1403			10.3390/ma13235456
basic oxygen furnace slag SL_BOF	23.31	4.89	27.07	27.82	5.64							3.63		13.1	10	30	5	60	1.2	0.24	40	2.1579	34.6075			10.3390/ma13235456
basic oxygen furnace slag SL_BOF	23.31	4.89	27.07	27.82	5.64							3.63		13.1	10	30	5	60	1.2	0.24	40	2.33625	35.8489			10.3390/ma13235456
basic oxygen furnace slag SL_BOF	23.31	4.89	27.07	27.82	5.64							3.63		13.1	10	30	5	60	1.2	0.24	40	2.5146	36.9775			10.3390/ma13235456
basic oxygen furnace slag SL_BOF	23.31	4.89	27.07	27.82	5.64							3.63		13.1	10	30	5	60	1.2	0.24	40	2.69296	38.1626			10.3390/ma13235456
basic oxygen furnace slag SL_BOF	23.31	4.89	27.07	27.82	5.64							3.63		13.1	10	30	5	60	1.2	0.24	40	2.86807	39.1614			10.3390/ma13235456
basic oxygen furnace slag SL_BOF	23.31	4.89	27.07	27.82	5.64							3.63		13.1	10	30	5	60	1.2	0.24	40	3.04317	40.2166			10.3390/ma13235456
basic oxygen furnace slag SL_BOF	23.31	4.89	27.07	27.82	5.64							3.63		13.1	10	30	5	60	1.2	0.24	40	3.22801	41.0969			10.3390/ma13235456
basic oxygen furnace slag SL_BOF	23.31	4.89	27.07	27.82	5.64							3.63		13.1	10	30	5	60	1.2	0.24	40	3.40636	41.887			10.3390/ma13235456
basic oxygen furnace slag SL_BOF	23.31	4.89	27.07	27.82	5.64							3.63		13.1	10	30	5	60	1.2	0.24	40	3.58471	42.9027			10.3390/ma13235456
basic oxygen furnace slag SL_BOF	23.31	4.89	27.07	27.82	5.64							3.63		13.1	10	30	5	60	1.2	0.24	40	3.76307	43.862			10.3390/ma13235456
basic oxygen furnace slag SL_BOF	23.31	4.89	27.07	27.82	5.64							3.63		13.1	10	30	5	60	1.2	0.24	40	3.94142	44.4827			10.3390/ma13235456
basic oxygen furnace slag SL_BOF	23.31	4.89	27.07	27.82	5.64							3.63		13.1	10	30	5	60	1.2	0.24	40	4.11977	45.4985			10.3390/ma13235456
basic oxygen furnace slag SL_BOF	23.31	4.89	27.07	27.82	5.64							3.63		13.1	10	30	5	60	1.2	0.24	40	4.30461	46.0515			10.3390/ma13235456
basic oxygen furnace slag SL_BOF	23.31	4.89	27.07	27.82	5.64							3.63		13.1	10	30	5	60	1.2	0.24	40	4.47647	47.1914			10.3390/ma13235456
basic oxygen furnace slag SL_BOF	23.31	4.89	27.07	27.82	5.64							3.63		13.1	10	30	5	60	1.2	0.24	40	4.65645	47.8516			10.3390/ma13235456
basic oxygen furnace slag SL_BOF	23.31	4.89	27.07	27.82	5.64							3.63		13.1	10	30	5	60	1.2	0.24	40	4.82507	48.8448			10.3390/ma13235456
basic oxygen furnace slag SL_BOF	23.31	4.89	27.07	27.82	5.64							3.63		13.1	10	30	5	60	1.2	0.24	40	5.01333	49.4172			10.3390/ma13235456
basic oxygen furnace slag SL_BOF	23.31	4.89	27.07	27.82	5.64							3.63		13.1	10	30	5	60	1.2	0.24	40	5.18988	50.2386			10.3390/ma13235456
basic oxygen furnace slag SL_BOF	23.31	4.89	27.07	27.82	5.64							3.63		13.1	10	30	5	60	1.2	0.24	40	5.37309	50.707			10.3390/ma13235456
basic oxygen furnace slag SL_BOF	23.31	4.89	27.07	27.82	5.64							3.63		13.1	10	30	5	60	1.2	0.24	40	5.54658	51.5929			10.3390/ma13235456
basic oxygen furnace slag SL_BOF	23.31	4.89	27.07	27.82	5.64							3.63		13.1	10	30	5	60	1.2	0.24	40	5.72493	51.8186			10.3390/ma13235456
basic oxygen furnace slag SL_BOF	23.31	4.89	27.07	27.82	5.64							3.63		13.1	10	30	5	60	1.2	0.24	40	5.90328	52.6087			10.3390/ma13235456
basic oxygen furnace slag SL_BOF	23.31	4.89	27.07	27.82	5.64							3.63		13.1	10	30	5	60	1.2	0.24	40	6.08164	53.0037			10.3390/ma13235456
basic oxygen furnace slag SL_BOF	23.31	4.89	27.07	27.82	5.64							3.63		13.1	10	30	5	60	1.2	0.24	40	6.25999	53.6808			10.3390/ma13235456
basic oxygen furnace slag SL_BOF	23.31	4.89	27.07	27.82	5.64							3.63		13.1	10	30	5	60	1.2	0.24	40	6.43834	54.2451			10.3390/ma13235456
basic oxygen furnace slag SL_BOF	23.31	4.89	27.07	27.82	5.64							3.63		13.1	10	30	5	60	1.2	0.24	40	6.61345	54.4934			10.3390/ma13235456
basic oxygen furnace slag SL_BOF	23.31	4.89	27.07	27.82	5.64							3.63		13.1	10	30	5	60	1.2	0.24	40	6.79342	55.3004			10.3390/ma13235456
basic oxygen furnace slag SL_BOF	23.31	4.89	27.07	27.82	5.64							3.63		13.1	10	30	5	60	1.2	0.24	40	7	55.4866			10.3390/ma13235456
ladle slag SL_LF	27.82	5.64	13.53	33.83	12.03							3.04		10.3	10	30	5	60	1.2	0.24	40	0.106859	9.13875			10.3390/ma13235456
ladle slag SL_LF	27.82	5.64	13.53	33.83	12.03							3.04		10.3	10	30	5	60	1.2	0.24	40	0.212248	22.6766			10.3390/ma13235456
ladle slag SL_LF	27.82	5.64	13.53	33.83	12.03							3.04		10.3	10	30	5	60	1.2	0.24	40	0.341958	36.8647			10.3390/ma13235456
ladle slag SL_LF	27.82	5.64	13.53	33.83	12.03							3.04		10.3	10	30	5	60	1.2	0.24	40	0.504096	50.5207			10.3390/ma13235456
ladle slag SL_LF	27.82	5.64	13.53	33.83	12.03							3.04		10.3	10	30	5	60	1.2	0.24	40	0.658127	60.4524			10.3390/ma13235456
ladle slag SL_LF	27.82	5.64	13.53	33.83	12.03							3.04		10.3	10	30	5	60	1.2	0.24	40	0.925654	72.1899			10.3390/ma13235456
ladle slag SL_LF	27.82	5.64	13.53	33.83	12.03							3.04		10.3	10	30	5	60	1.2	0.24	40	1.10401	77.8329			10.3390/ma13235456
ladle slag SL_LF	27.82	5.64	13.53	33.83	12.03							3.04		10.3	10	30	5	60	1.2	0.24	40	1.28236	81.8055			10.3390/ma13235456
ladle slag SL_LF	27.82	5.64	13.53	33.83	12.03							3.04		10.3	10	30	5	60	1.2	0.24	40	1.45891	85.0747			10.3390/ma13235456
ladle slag SL_LF	27.82	5.64	13.53	33.83	12.03							3.04		10.3	10	30	5	60	1.2	0.24	40	1.63906	88.1595			10.3390/ma13235456
ladle slag SL_LF	27.82	5.64	13.53	33.83	12.03							3.04		10.3	10	30	5	60	1.2	0.24	40	1.81741	90.8118			10.3390/ma13235456
ladle slag SL_LF	27.82	5.64	13.53	33.83	12.03							3.04		10.3	10	30	5	60	1.2	0.24	40	1.99576	93.069			10.3390/ma13235456
ladle slag SL_LF	27.82	5.64	13.53	33.83	12.03							3.04		10.3	10	30	5	60	1.2	0.24	40	2.17231	94.7305			10.3390/ma13235456
ladle slag SL_LF	27.82	5.64	13.53	33.83	12.03							3.04		10.3	10	30	5	60	1.2	0.24	40	2.33805	96.5927			10.3390/ma13235456
ladle slag SL_LF	27.82	5.64	13.53	33.83	12.03							3.04		10.3	10	30	5	60	1.2	0.24	40	2.5146	98.3169			10.3390/ma13235456
ladle slag SL_LF	27.82	5.64	13.53	33.83	12.03							3.04		10.3	10	30	5	60	1.2	0.24	40	2.70917	100.123			10.3390/ma13235456
ladle slag SL_LF	27.82	5.64	13.53	33.83	12.03							3.04		10.3	10	30	5	60	1.2	0.24	40	2.88752	101.533			10.3390/ma13235456
ladle slag SL_LF	27.82	5.64	13.53	33.83	12.03							3.04		10.3	10	30	5	60	1.2	0.24	40	3.05777	103.097			10.3390/ma13235456
ladle slag SL_LF	27.82	5.64	13.53	33.83	12.03							3.04		10.3	10	30	5	60	1.2	0.24	40	3.23612	104.369			10.3390/ma13235456
ladle slag SL_LF	27.82	5.64	13.53	33.83	12.03							3.04		10.3	10	30	5	60	1.2	0.24	40	3.42798	105.766			10.3390/ma13235456
ladle slag SL_LF	27.82	5.64	13.53	33.83	12.03							3.04		10.3	10	30	5	60	1.2	0.24	40	3.60417	106.635			10.3390/ma13235456
ladle slag SL_LF	27.82	5.64	13.53	33.83	12.03							3.04		10.3	10	30	5	60	1.2	0.24	40	3.77928	107.797			10.3390/ma13235456
ladle slag SL_LF	27.82	5.64	13.53	33.83	12.03							3.04		10.3	10	30	5	60	1.2	0.24	40	3.95277	108.745			10.3390/ma13235456
ladle slag SL_LF	27.82	5.64	13.53	33.83	12.03							3.04		10.3	10	30	5	60	1.2	0.24	40	4.13598	109.772			10.3390/ma13235456
ladle slag SL_LF	27.82	5.64	13.53	33.83	12.03							3.04		10.3	10	30	5	60	1.2	0.24	40	4.32334	110.594			10.3390/ma13235456
ladle slag SL_LF	27.82	5.64	13.53	33.83	12.03							3.04		10.3	10	30	5	60	1.2	0.24	40	4.48782	111.414			10.3390/ma13235456
ladle slag SL_LF	27.82	5.64	13.53	33.83	12.03							3.04		10.3	10	30	5	60	1.2	0.24	40	4.66293	112.206			10.3390/ma13235456
ladle slag SL_LF	27.82	5.64	13.53	33.83	12.03							3.04		10.3	10	30	5	60	1.2	0.24	40	4.84939	113.045			10.3390/ma13235456
ladle slag SL_LF	27.82	5.64	13.53	33.83	12.03							3.04		10.3	10	30	5	60	1.2	0.24	40	5.02774	114.117			10.3390/ma13235456
ladle slag SL_LF	27.82	5.64	13.53	33.83	12.03							3.04		10.3	10	30	5	60	1.2	0.24	40	5.18785	114.611			10.3390/ma13235456
ladle slag SL_LF	27.82	5.64	13.53	33.83	12.03							3.04		10.3	10	30	5	60	1.2	0.24	40	5.38282	115.573			10.3390/ma13235456
ladle slag SL_LF	27.82	5.64	13.53	33.83	12.03							3.04		10.3	10	30	5	60	1.2	0.24	40	5.5628	116.318			10.3390/ma13235456
ladle slag SL_LF	27.82	5.64	13.53	33.83	12.03							3.04		10.3	10	30	5	60	1.2	0.24	40	5.75015	117.215			10.3390/ma13235456
ladle slag SL_LF	27.82	5.64	13.53	33.83	12.03							3.04		10.3	10	30	5	60	1.2	0.24	40	5.91788	117.684			10.3390/ma13235456
ladle slag SL_LF	27.82	5.64	13.53	33.83	12.03							3.04		10.3	10	30	5	60	1.2	0.24	40	6.11406	118.688			10.3390/ma13235456
ladle slag SL_LF	27.82	5.64	13.53	33.83	12.03							3.04		10.3	10	30	5	60	1.2	0.24	40	6.29566	118.987			10.3390/ma13235456
ladle slag SL_LF	27.82	5.64	13.53	33.83	12.03							3.04		10.3	10	30	5	60	1.2	0.24	40	6.47239	119.918			10.3390/ma13235456
ladle slag SL_LF	27.82	5.64	13.53	33.83	12.03							3.04		10.3	10	30	5	60	1.2	0.24	40	6.66736	120.818			10.3390/ma13235456
ladle slag SL_LF	27.82	5.64	13.53	33.83	12.03							3.04		10.3	10	30	5	60	1.2	0.24	40	6.81936	121.284			10.3390/ma13235456
ladle slag SL_LF	27.82	5.64	13.53	33.83	12.03							3.04		10.3	10	30	5	60	1.2	0.24	40	7	121.284			10.3390/ma13235456
iron silicate slag SL_AUR	34.59	5.64	51.88	3.01	1.13							2.4	40	9.5	10	30	5	60	1.2	0.24	40	0.248729	5.51783			10.3390/ma13235456
iron silicate slag SL_AUR	34.59	5.64	51.88	3.01	1.13							2.4	40	9.5	10	30	5	60	1.2	0.24	40	0.439241	8.93184			10.3390/ma13235456
iron silicate slag SL_AUR	34.59	5.64	51.88	3.01	1.13							2.4	40	9.5	10	30	5	60	1.2	0.24	40	0.617593	11.4712			10.3390/ma13235456
iron silicate slag SL_AUR	34.59	5.64	51.88	3.01	1.13							2.4	40	9.5	10	30	5	60	1.2	0.24	40	0.795944	13.672			10.3390/ma13235456
iron silicate slag SL_AUR	34.59	5.64	51.88	3.01	1.13							2.4	40	9.5	10	30	5	60	1.2	0.24	40	0.975917	15.884			10.3390/ma13235456
iron silicate slag SL_AUR	34.59	5.64	51.88	3.01	1.13							2.4	40	9.5	10	30	5	60	1.2	0.24	40	1.1494	17.9324			10.3390/ma13235456
iron silicate slag SL_AUR	34.59	5.64	51.88	3.01	1.13							2.4	40	9.5	10	30	5	60	1.2	0.24	40	1.32559	19.8291			10.3390/ma13235456
iron silicate slag SL_AUR	34.59	5.64	51.88	3.01	1.13							2.4	40	9.5	10	30	5	60	1.2	0.24	40	1.50124	21.5327			10.3390/ma13235456
iron silicate slag SL_AUR	34.59	5.64	51.88	3.01	1.13							2.4	40	9.5	10	30	5	60	1.2	0.24	40	1.69311	23.3466			10.3390/ma13235456
iron silicate slag SL_AUR	34.59	5.64	51.88	3.01	1.13							2.4	40	9.5	10	30	5	60	1.2	0.24	40	1.86605	24.8451			10.3390/ma13235456
iron silicate slag SL_AUR	34.59	5.64	51.88	3.01	1.13							2.4	40	9.5	10	30	5	60	1.2	0.24	40	2.04441	26.3687			10.3390/ma13235456
iron silicate slag SL_AUR	34.59	5.64	51.88	3.01	1.13							2.4	40	9.5	10	30	5	60	1.2	0.24	40	2.21789	27.6779			10.3390/ma13235456
iron silicate slag SL_AUR	34.59	5.64	51.88	3.01	1.13							2.4	40	9.5	10	30	5	60	1.2	0.24	40	2.3903	29.0021			10.3390/ma13235456
iron silicate slag SL_AUR	34.59	5.64	51.88	3.01	1.13							2.4	40	9.5	10	30	5	60	1.2	0.24	40	2.57946	30.3188			10.3390/ma13235456
iron silicate slag SL_AUR	34.59	5.64	51.88	3.01	1.13							2.4	40	9.5	10	30	5	60	1.2	0.24	40	2.75457	31.5885			10.3390/ma13235456
iron silicate slag SL_AUR	34.59	5.64	51.88	3.01	1.13							2.4	40	9.5	10	30	5	60	1.2	0.24	40	2.93616	33.0274			10.3390/ma13235456
iron silicate slag SL_AUR	34.59	5.64	51.88	3.01	1.13							2.4	40	9.5	10	30	5	60	1.2	0.24	40	3.11451	34.3253			10.3390/ma13235456
iron silicate slag SL_AUR	34.59	5.64	51.88	3.01	1.13							2.4	40	9.5	10	30	5	60	1.2	0.24	40	3.29287	35.4539			10.3390/ma13235456
iron silicate slag SL_AUR	34.59	5.64	51.88	3.01	1.13							2.4	40	9.5	10	30	5	60	1.2	0.24	40	3.47122	36.639			10.3390/ma13235456
iron silicate slag SL_AUR	34.59	5.64	51.88	3.01	1.13							2.4	40	9.5	10	30	5	60	1.2	0.24	40	3.64957	37.7111			10.3390/ma13235456
iron silicate slag SL_AUR	34.59	5.64	51.88	3.01	1.13							2.4	40	9.5	10	30	5	60	1.2	0.24	40	3.81981	38.789			10.3390/ma13235456
iron silicate slag SL_AUR	34.59	5.64	51.88	3.01	1.13							2.4	40	9.5	10	30	5	60	1.2	0.24	40	4.00952	39.658			10.3390/ma13235456
iron silicate slag SL_AUR	34.59	5.64	51.88	3.01	1.13							2.4	40	9.5	10	30	5	60	1.2	0.24	40	4.18949	40.8374			10.3390/ma13235456
iron silicate slag SL_AUR	34.59	5.64	51.88	3.01	1.13							2.4	40	9.5	10	30	5	60	1.2	0.24	40	4.36135	41.6443			10.3390/ma13235456
iron silicate slag SL_AUR	34.59	5.64	51.88	3.01	1.13							2.4	40	9.5	10	30	5	60	1.2	0.24	40	4.54133	42.677			10.3390/ma13235456
iron silicate slag SL_AUR	34.59	5.64	51.88	3.01	1.13							2.4	40	9.5	10	30	5	60	1.2	0.24	40	4.71968	43.5799			10.3390/ma13235456
iron silicate slag SL_AUR	34.59	5.64	51.88	3.01	1.13							2.4	40	9.5	10	30	5	60	1.2	0.24	40	4.89803	44.4263			10.3390/ma13235456
iron silicate slag SL_AUR	34.59	5.64	51.88	3.01	1.13							2.4	40	9.5	10	30	5	60	1.2	0.24	40	5.08179	45.417			10.3390/ma13235456
iron silicate slag SL_AUR	34.59	5.64	51.88	3.01	1.13							2.4	40	9.5	10	30	5	60	1.2	0.24	40	5.2677	46.4239			10.3390/ma13235456
iron silicate slag SL_AUR	34.59	5.64	51.88	3.01	1.13							2.4	40	9.5	10	30	5	60	1.2	0.24	40	5.46551	47.3042			10.3390/ma13235456
iron silicate slag SL_AUR	34.59	5.64	51.88	3.01	1.13							2.4	40	9.5	10	30	5	60	1.2	0.24	40	5.64927	48.3827			10.3390/ma13235456
iron silicate slag SL_AUR	34.59	5.64	51.88	3.01	1.13							2.4	40	9.5	10	30	5	60	1.2	0.24	40	5.82424	49.2793			10.3390/ma13235456
iron silicate slag SL_AUR	34.59	5.64	51.88	3.01	1.13							2.4	40	9.5	10	30	5	60	1.2	0.24	40	6.00057	50.1822			10.3390/ma13235456
iron silicate slag SL_AUR	34.59	5.64	51.88	3.01	1.13							2.4	40	9.5	10	30	5	60	1.2	0.24	40	6.17532	50.5207			10.3390/ma13235456
iron silicate slag SL_AUR	34.59	5.64	51.88	3.01	1.13							2.4	40	9.5	10	30	5	60	1.2	0.24	40	6.35403	51.3898			10.3390/ma13235456
iron silicate slag SL_AUR	34.59	5.64	51.88	3.01	1.13							2.4	40	9.5	10	30	5	60	1.2	0.24	40	6.52144	51.7622			10.3390/ma13235456
iron silicate slag SL_AUR	34.59	5.64	51.88	3.01	1.13							2.4	40	9.5	10	30	5	60	1.2	0.24	40	7	53.0037			10.3390/ma13235456
red mud RM	21.8	16.92	37.97	10.15	0.75							2.88		0.4	10	30	5	60	1.2	0.24	40	0.0420035	11.6217			10.3390/ma13235456
red mud RM	21.8	16.92	37.97	10.15	0.75							2.88		0.4	10	30	5	60	1.2	0.24	40	0.0825379	32.9334			10.3390/ma13235456
red mud RM	21.8	16.92	37.97	10.15	0.75							2.88		0.4	10	30	5	60	1.2	0.24	40	0.228462	57.5557			10.3390/ma13235456
red mud RM	21.8	16.92	37.97	10.15	0.75							2.88		0.4	10	30	5	60	1.2	0.24	40	0.423027	63.5561			10.3390/ma13235456
red mud RM	21.8	16.92	37.97	10.15	0.75							2.88		0.4	10	30	5	60	1.2	0.24	40	0.682448	66.2459			10.3390/ma13235456
red mud RM	21.8	16.92	37.97	10.15	0.75							2.88		0.4	10	30	5	60	1.2	0.24	40	0.839181	66.2459			10.3390/ma13235456
red mud RM	21.8	16.92	37.97	10.15	0.75							2.88		0.4	10	30	5	60	1.2	0.24	40	1.06185	67.0322			10.3390/ma13235456
red mud RM	21.8	16.92	37.97	10.15	0.75							2.88		0.4	10	30	5	60	1.2	0.24	40	1.2398	67.1253			10.3390/ma13235456
red mud RM	21.8	16.92	37.97	10.15	0.75							2.88		0.4	10	30	5	60	1.2	0.24	40	1.39585	67.9012			10.3390/ma13235456
red mud RM	21.8	16.92	37.97	10.15	0.75							2.88		0.4	10	30	5	60	1.2	0.24	40	1.75256	67.9012			10.3390/ma13235456
red mud RM	21.8	16.92	37.97	10.15	0.75							2.88		0.4	10	30	5	60	1.2	0.24	40	1.86605	67.9012			10.3390/ma13235456
red mud RM	21.8	16.92	37.97	10.15	0.75							2.88		0.4	10	30	5	60	1.2	0.24	40	3.42258	67.9012			10.3390/ma13235456
red mud RM	21.8	16.92	37.97	10.15	0.75							2.88		0.4	10	30	5	60	1.2	0.24	40	4.1749	67.9012			10.3390/ma13235456
red mud RM	21.8	16.92	37.97	10.15	0.75							2.88		0.4	10	30	5	60	1.2	0.24	40	4.34676	67.9012			10.3390/ma13235456
red mud RM	21.8	16.92	37.97	10.15	0.75							2.88		0.4	10	30	5	60	1.2	0.24	40	4.52511	67.9012			10.3390/ma13235456
red mud RM	21.8	16.92	37.97	10.15	0.75							2.88		0.4	10	30	5	60	1.2	0.24	40	4.70347	67.9012			10.3390/ma13235456
red mud RM	21.8	16.92	37.97	10.15	0.75							2.88		0.4	10	30	5	60	1.2	0.24	40	4.88182	67.9012			10.3390/ma13235456
red mud RM	21.8	16.92	37.97	10.15	0.75							2.88		0.4	10	30	5	60	1.2	0.24	40	5.06017	67.9012			10.3390/ma13235456
red mud RM	21.8	16.92	37.97	10.15	0.75							2.88		0.4	10	30	5	60	1.2	0.24	40	5.23852	67.9012			10.3390/ma13235456
red mud RM	21.8	16.92	37.97	10.15	0.75							2.88		0.4	10	30	5	60	1.2	0.24	40	5.41687	67.9012			10.3390/ma13235456
red mud RM	21.8	16.92	37.97	10.15	0.75							2.88		0.4	10	30	5	60	1.2	0.24	40	5.59522	67.9012			10.3390/ma13235456
red mud RM	21.8	16.92	37.97	10.15	0.75							2.88		0.4	10	30	5	60	1.2	0.24	40	5.77357	67.9012			10.3390/ma13235456
red mud RM	21.8	16.92	37.97	10.15	0.75							2.88		0.4	10	30	5	60	1.2	0.24	40	5.95193	67.9012			10.3390/ma13235456
red mud RM	21.8	16.92	37.97	10.15	0.75							2.88		0.4	10	30	5	60	1.2	0.24	40	6.08164	67.9012			10.3390/ma13235456
red mud RM	21.8	16.92	37.97	10.15	0.75							2.88		0.4	10	30	5	60	1.2	0.24	40	7	68.5219			10.3390/ma13235456
coal combustion fly ash FA_T	53.38	19.55	9.02	11.28	2.63							2.08	90	15.2	10	30	5	60	1.2	0.24	40	0.11569	15.5281			10.3390/ma13235456
coal combustion fly ash FA_T	53.38	19.55	9.02	11.28	2.63							2.08	90	15.2	10	30	5	60	1.2	0.24	40	0.204876	30.54			10.3390/ma13235456
coal combustion fly ash FA_T	53.38	19.55	9.02	11.28	2.63							2.08	90	15.2	10	30	5	60	1.2	0.24	40	0.30217	45.0976			10.3390/ma13235456
coal combustion fly ash FA_T	53.38	19.55	9.02	11.28	2.63							2.08	90	15.2	10	30	5	60	1.2	0.24	40	0.407571	58.8145			10.3390/ma13235456
coal combustion fly ash FA_T	53.38	19.55	9.02	11.28	2.63							2.08	90	15.2	10	30	5	60	1.2	0.24	40	0.52108	72.6199			10.3390/ma13235456
coal combustion fly ash FA_T	53.38	19.55	9.02	11.28	2.63							2.08	90	15.2	10	30	5	60	1.2	0.24	40	0.654859	87.2218			10.3390/ma13235456
coal combustion fly ash FA_T	53.38	19.55	9.02	11.28	2.63							2.08	90	15.2	10	30	5	60	1.2	0.24	40	0.807556	101.057			10.3390/ma13235456
coal combustion fly ash FA_T	53.38	19.55	9.02	11.28	2.63							2.08	90	15.2	10	30	5	60	1.2	0.24	40	0.962956	112.543			10.3390/ma13235456
coal combustion fly ash FA_T	53.38	19.55	9.02	11.28	2.63							2.08	90	15.2	10	30	5	60	1.2	0.24	40	1.15552	126.249			10.3390/ma13235456
coal combustion fly ash FA_T	53.38	19.55	9.02	11.28	2.63							2.08	90	15.2	10	30	5	60	1.2	0.24	40	1.34087	138.569			10.3390/ma13235456
coal combustion fly ash FA_T	53.38	19.55	9.02	11.28	2.63							2.08	90	15.2	10	30	5	60	1.2	0.24	40	1.51023	150.126			10.3390/ma13235456
coal combustion fly ash FA_T	53.38	19.55	9.02	11.28	2.63							2.08	90	15.2	10	30	5	60	1.2	0.24	40	1.70122	162.247			10.3390/ma13235456
coal combustion fly ash FA_T	53.38	19.55	9.02	11.28	2.63							2.08	90	15.2	10	30	5	60	1.2	0.24	40	1.87184	172.523			10.3390/ma13235456
coal combustion fly ash FA_T	53.38	19.55	9.02	11.28	2.63							2.08	90	15.2	10	30	5	60	1.2	0.24	40	2.04535	183.054			10.3390/ma13235456
coal combustion fly ash FA_T	53.38	19.55	9.02	11.28	2.63							2.08	90	15.2	10	30	5	60	1.2	0.24	40	2.22012	192.188			10.3390/ma13235456
coal combustion fly ash FA_T	53.38	19.55	9.02	11.28	2.63							2.08	90	15.2	10	30	5	60	1.2	0.24	40	2.39804	201.592			10.3390/ma13235456
coal combustion fly ash FA_T	53.38	19.55	9.02	11.28	2.63							2.08	90	15.2	10	30	5	60	1.2	0.24	40	2.59992	211.736			10.3390/ma13235456
coal combustion fly ash FA_T	53.38	19.55	9.02	11.28	2.63							2.08	90	15.2	10	30	5	60	1.2	0.24	40	2.7959	220.674			10.3390/ma13235456
coal combustion fly ash FA_T	53.38	19.55	9.02	11.28	2.63							2.08	90	15.2	10	30	5	60	1.2	0.24	40	3.01828	230.32			10.3390/ma13235456
coal combustion fly ash FA_T	53.38	19.55	9.02	11.28	2.63							2.08	90	15.2	10	30	5	60	1.2	0.24	40	3.20274	237.986			10.3390/ma13235456
coal combustion fly ash FA_T	53.38	19.55	9.02	11.28	2.63							2.08	90	15.2	10	30	5	60	1.2	0.24	40	3.38223	244.843			10.3390/ma13235456
coal combustion fly ash FA_T	53.38	19.55	9.02	11.28	2.63							2.08	90	15.2	10	30	5	60	1.2	0.24	40	3.58745	252.559			10.3390/ma13235456
coal combustion fly ash FA_T	53.38	19.55	9.02	11.28	2.63							2.08	90	15.2	10	30	5	60	1.2	0.24	40	3.757	258.403			10.3390/ma13235456
coal combustion fly ash FA_T	53.38	19.55	9.02	11.28	2.63							2.08	90	15.2	10	30	5	60	1.2	0.24	40	3.94866	264.778			10.3390/ma13235456
coal combustion fly ash FA_T	53.38	19.55	9.02	11.28	2.63							2.08	90	15.2	10	30	5	60	1.2	0.24	40	4.12905	270.276			10.3390/ma13235456
coal combustion fly ash FA_T	53.38	19.55	9.02	11.28	2.63							2.08	90	15.2	10	30	5	60	1.2	0.24	40	4.30256	275.851			10.3390/ma13235456
coal combustion fly ash FA_T	53.38	19.55	9.02	11.28	2.63							2.08	90	15.2	10	30	5	60	1.2	0.24	40	4.49715	280.745			10.3390/ma13235456
coal combustion fly ash FA_T	53.38	19.55	9.02	11.28	2.63							2.08	90	15.2	10	30	5	60	1.2	0.24	40	4.66867	285.247			10.3390/ma13235456
coal combustion fly ash FA_T	53.38	19.55	9.02	11.28	2.63							2.08	90	15.2	10	30	5	60	1.2	0.24	40	4.84254	289.789			10.3390/ma13235456
coal combustion fly ash FA_T	53.38	19.55	9.02	11.28	2.63							2.08	90	15.2	10	30	5	60	1.2	0.24	40	5.03226	294.683			10.3390/ma13235456
coal combustion fly ash FA_T	53.38	19.55	9.02	11.28	2.63							2.08	90	15.2	10	30	5	60	1.2	0.24	40	5.20739	298.462			10.3390/ma13235456
coal combustion fly ash FA_T	53.38	19.55	9.02	11.28	2.63							2.08	90	15.2	10	30	5	60	1.2	0.24	40	5.3736	302.489			10.3390/ma13235456
coal combustion fly ash FA_T	53.38	19.55	9.02	11.28	2.63							2.08	90	15.2	10	30	5	60	1.2	0.24	40	5.55603	306.102			10.3390/ma13235456
coal combustion fly ash FA_T	53.38	19.55	9.02	11.28	2.63							2.08	90	15.2	10	30	5	60	1.2	0.24	40	5.73643	309.613			10.3390/ma13235456
coal combustion fly ash FA_T	53.38	19.55	9.02	11.28	2.63							2.08	90	15.2	10	30	5	60	1.2	0.24	40	5.91547	313.261			10.3390/ma13235456
coal combustion fly ash FA_T	53.38	19.55	9.02	11.28	2.63							2.08	90	15.2	10	30	5	60	1.2	0.24	40	6.08912	316.349			10.3390/ma13235456
coal combustion fly ash FA_T	53.38	19.55	9.02	11.28	2.63							2.08	90	15.2	10	30	5	60	1.2	0.24	40	6.27762	319.524			10.3390/ma13235456
coal combustion fly ash FA_T	53.38	19.55	9.02	11.28	2.63							2.08	90	15.2	10	30	5	60	1.2	0.24	40	6.4632	322.621			10.3390/ma13235456
coal combustion fly ash FA_T	53.38	19.55	9.02	11.28	2.63							2.08	90	15.2	10	30	5	60	1.2	0.24	40	6.62896	325.306			10.3390/ma13235456
coal combustion fly ash FA_T	53.38	19.55	9.02	11.28	2.63							2.08	90	15.2	10	30	5	60	1.2	0.24	40	6.79652	327.921			10.3390/ma13235456
coal combustion fly ash FA_T	53.38	19.55	9.02	11.28	2.63							2.08	90	15.2	10	30	5	60	1.2	0.24	40	7	330.52			10.3390/ma13235456
coal combustion fly ash FA_K	51.5	20.68	7.14	12.78	2.63							2.47	90	8.6	10	30	5	60	1.2	0.24	40	0.156229	12.5753			10.3390/ma13235456
coal combustion fly ash FA_K	51.5	20.68	7.14	12.78	2.63							2.47	90	8.6	10	30	5	60	1.2	0.24	40	0.303791	25.2745			10.3390/ma13235456
coal combustion fly ash FA_K	51.5	20.68	7.14	12.78	2.63							2.47	90	8.6	10	30	5	60	1.2	0.24	40	0.480541	38.779			10.3390/ma13235456
coal combustion fly ash FA_K	51.5	20.68	7.14	12.78	2.63							2.47	90	8.6	10	30	5	60	1.2	0.24	40	0.650805	51.7429			10.3390/ma13235456
coal combustion fly ash FA_K	51.5	20.68	7.14	12.78	2.63							2.47	90	8.6	10	30	5	60	1.2	0.24	40	0.842149	66.7792			10.3390/ma13235456
coal combustion fly ash FA_K	51.5	20.68	7.14	12.78	2.63							2.47	90	8.6	10	30	5	60	1.2	0.24	40	1.01566	79.7262			10.3390/ma13235456
coal combustion fly ash FA_K	51.5	20.68	7.14	12.78	2.63							2.47	90	8.6	10	30	5	60	1.2	0.24	40	1.17202	92.797			10.3390/ma13235456
coal combustion fly ash FA_K	51.5	20.68	7.14	12.78	2.63							2.47	90	8.6	10	30	5	60	1.2	0.24	40	1.33186	107.183			10.3390/ma13235456
coal combustion fly ash FA_K	51.5	20.68	7.14	12.78	2.63							2.47	90	8.6	10	30	5	60	1.2	0.24	40	1.4778	119.985			10.3390/ma13235456
coal combustion fly ash FA_K	51.5	20.68	7.14	12.78	2.63							2.47	90	8.6	10	30	5	60	1.2	0.24	40	1.64198	133.45			10.3390/ma13235456
coal combustion fly ash FA_K	51.5	20.68	7.14	12.78	2.63							2.47	90	8.6	10	30	5	60	1.2	0.24	40	1.82644	146.319			10.3390/ma13235456
coal combustion fly ash FA_K	51.5	20.68	7.14	12.78	2.63							2.47	90	8.6	10	30	5	60	1.2	0.24	40	2.01292	156.941			10.3390/ma13235456
coal combustion fly ash FA_K	51.5	20.68	7.14	12.78	2.63							2.47	90	8.6	10	30	5	60	1.2	0.24	40	2.18318	164.966			10.3390/ma13235456
coal combustion fly ash FA_K	51.5	20.68	7.14	12.78	2.63							2.47	90	8.6	10	30	5	60	1.2	0.24	40	2.37452	172.895			10.3390/ma13235456
coal combustion fly ash FA_K	51.5	20.68	7.14	12.78	2.63							2.47	90	8.6	10	30	5	60	1.2	0.24	40	2.54108	179.258			10.3390/ma13235456
coal combustion fly ash FA_K	51.5	20.68	7.14	12.78	2.63							2.47	90	8.6	10	30	5	60	1.2	0.24	40	2.7246	186.406			10.3390/ma13235456
coal combustion fly ash FA_K	51.5	20.68	7.14	12.78	2.63							2.47	90	8.6	10	30	5	60	1.2	0.24	40	2.91937	193.337			10.3390/ma13235456
coal combustion fly ash FA_K	51.5	20.68	7.14	12.78	2.63							2.47	90	8.6	10	30	5	60	1.2	0.24	40	3.09241	199.435			10.3390/ma13235456
coal combustion fly ash FA_K	51.5	20.68	7.14	12.78	2.63							2.47	90	8.6	10	30	5	60	1.2	0.24	40	3.24994	204.391			10.3390/ma13235456
coal combustion fly ash FA_K	51.5	20.68	7.14	12.78	2.63							2.47	90	8.6	10	30	5	60	1.2	0.24	40	3.45611	211.598			10.3390/ma13235456
coal combustion fly ash FA_K	51.5	20.68	7.14	12.78	2.63							2.47	90	8.6	10	30	5	60	1.2	0.24	40	3.63772	217.063			10.3390/ma13235456
coal combustion fly ash FA_K	51.5	20.68	7.14	12.78	2.63							2.47	90	8.6	10	30	5	60	1.2	0.24	40	3.80744	222.473			10.3390/ma13235456
coal combustion fly ash FA_K	51.5	20.68	7.14	12.78	2.63							2.47	90	8.6	10	30	5	60	1.2	0.24	40	4.02185	228.806			10.3390/ma13235456
coal combustion fly ash FA_K	51.5	20.68	7.14	12.78	2.63							2.47	90	8.6	10	30	5	60	1.2	0.24	40	4.19594	234.037			10.3390/ma13235456
coal combustion fly ash FA_K	51.5	20.68	7.14	12.78	2.63							2.47	90	8.6	10	30	5	60	1.2	0.24	40	4.3804	239.331			10.3390/ma13235456
coal combustion fly ash FA_K	51.5	20.68	7.14	12.78	2.63							2.47	90	8.6	10	30	5	60	1.2	0.24	40	4.55697	243.811			10.3390/ma13235456
coal combustion fly ash FA_K	51.5	20.68	7.14	12.78	2.63							2.47	90	8.6	10	30	5	60	1.2	0.24	40	4.75133	249.446			10.3390/ma13235456
coal combustion fly ash FA_K	51.5	20.68	7.14	12.78	2.63							2.47	90	8.6	10	30	5	60	1.2	0.24	40	4.9083	253.585			10.3390/ma13235456
coal combustion fly ash FA_K	51.5	20.68	7.14	12.78	2.63							2.47	90	8.6	10	30	5	60	1.2	0.24	40	5.09388	257.971			10.3390/ma13235456
coal combustion fly ash FA_K	51.5	20.68	7.14	12.78	2.63							2.47	90	8.6	10	30	5	60	1.2	0.24	40	5.27225	262.87			10.3390/ma13235456
coal combustion fly ash FA_K	51.5	20.68	7.14	12.78	2.63							2.47	90	8.6	10	30	5	60	1.2	0.24	40	5.45063	266.982			10.3390/ma13235456
coal combustion fly ash FA_K	51.5	20.68	7.14	12.78	2.63							2.47	90	8.6	10	30	5	60	1.2	0.24	40	5.62738	271.019			10.3390/ma13235456
coal combustion fly ash FA_K	51.5	20.68	7.14	12.78	2.63							2.47	90	8.6	10	30	5	60	1.2	0.24	40	5.80737	275.61			10.3390/ma13235456
coal combustion fly ash FA_K	51.5	20.68	7.14	12.78	2.63							2.47	90	8.6	10	30	5	60	1.2	0.24	40	5.98574	279.444			10.3390/ma13235456
coal combustion fly ash FA_K	51.5	20.68	7.14	12.78	2.63							2.47	90	8.6	10	30	5	60	1.2	0.24	40	6.16411	283.144			10.3390/ma13235456
coal combustion fly ash FA_K	51.5	20.68	7.14	12.78	2.63							2.47	90	8.6	10	30	5	60	1.2	0.24	40	6.34609	287.174			10.3390/ma13235456
coal combustion fly ash FA_K	51.5	20.68	7.14	12.78	2.63							2.47	90	8.6	10	30	5	60	1.2	0.24	40	6.52491	291.183			10.3390/ma13235456
coal combustion fly ash FA_K	51.5	20.68	7.14	12.78	2.63							2.47	90	8.6	10	30	5	60	1.2	0.24	40	6.69923	294.464			10.3390/ma13235456
coal combustion fly ash FA_K	51.5	20.68	7.14	12.78	2.63							2.47	90	8.6	10	30	5	60	1.2	0.24	40	7	298.338			10.3390/ma13235456
silica fume SF_D	92.11	1.88	0.38	3.01	0.75							2.13	97	0.3	10	30	5	60	1.2	0.24	40	0.11569	15.4042			10.3390/ma13235456
silica fume SF_D	92.11	1.88	0.38	3.01	0.75							2.13	97	0.3	10	30	5	60	1.2	0.24	40	0.204876	30.6088			10.3390/ma13235456
silica fume SF_D	92.11	1.88	0.38	3.01	0.75							2.13	97	0.3	10	30	5	60	1.2	0.24	40	0.30217	45.0976			10.3390/ma13235456
silica fume SF_D	92.11	1.88	0.38	3.01	0.75							2.13	97	0.3	10	30	5	60	1.2	0.24	40	0.402166	58.4163			10.3390/ma13235456
silica fume SF_D	92.11	1.88	0.38	3.01	0.75							2.13	97	0.3	10	30	5	60	1.2	0.24	40	0.529188	73.5934			10.3390/ma13235456
silica fume SF_D	92.11	1.88	0.38	3.01	0.75							2.13	97	0.3	10	30	5	60	1.2	0.24	40	0.654859	87.3766			10.3390/ma13235456
silica fume SF_D	92.11	1.88	0.38	3.01	0.75							2.13	97	0.3	10	30	5	60	1.2	0.24	40	0.814988	101.315			10.3390/ma13235456
silica fume SF_D	92.11	1.88	0.38	3.01	0.75							2.13	97	0.3	10	30	5	60	1.2	0.24	40	0.956585	112.178			10.3390/ma13235456
silica fume SF_D	92.11	1.88	0.38	3.01	0.75							2.13	97	0.3	10	30	5	60	1.2	0.24	40	1.15812	126.603			10.3390/ma13235456
silica fume SF_D	92.11	1.88	0.38	3.01	0.75							2.13	97	0.3	10	30	5	60	1.2	0.24	40	1.32028	137.399			10.3390/ma13235456
silica fume SF_D	92.11	1.88	0.38	3.01	0.75							2.13	97	0.3	10	30	5	60	1.2	0.24	40	1.50375	149.541			10.3390/ma13235456
silica fume SF_D	92.11	1.88	0.38	3.01	0.75							2.13	97	0.3	10	30	5	60	1.2	0.24	40	1.71203	163.073			10.3390/ma13235456
silica fume SF_D	92.11	1.88	0.38	3.01	0.75							2.13	97	0.3	10	30	5	60	1.2	0.24	40	1.88319	173.103			10.3390/ma13235456
silica fume SF_D	92.11	1.88	0.38	3.01	0.75							2.13	97	0.3	10	30	5	60	1.2	0.24	40	2.05548	183.627			10.3390/ma13235456
silica fume SF_D	92.11	1.88	0.38	3.01	0.75							2.13	97	0.3	10	30	5	60	1.2	0.24	40	2.24318	193.399			10.3390/ma13235456
silica fume SF_D	92.11	1.88	0.38	3.01	0.75							2.13	97	0.3	10	30	5	60	1.2	0.24	40	2.42236	202.521			10.3390/ma13235456
silica fume SF_D	92.11	1.88	0.38	3.01	0.75							2.13	97	0.3	10	30	5	60	1.2	0.24	40	2.60073	211.658			10.3390/ma13235456
silica fume SF_D	92.11	1.88	0.38	3.01	0.75							2.13	97	0.3	10	30	5	60	1.2	0.24	40	2.79937	220.641			10.3390/ma13235456
silica fume SF_D	92.11	1.88	0.38	3.01	0.75							2.13	97	0.3	10	30	5	60	1.2	0.24	40	2.96639	228.09			10.3390/ma13235456
silica fume SF_D	92.11	1.88	0.38	3.01	0.75							2.13	97	0.3	10	30	5	60	1.2	0.24	40	3.15206	235.74			10.3390/ma13235456
silica fume SF_D	92.11	1.88	0.38	3.01	0.75							2.13	97	0.3	10	30	5	60	1.2	0.24	40	3.34057	243.097			10.3390/ma13235456
silica fume SF_D	92.11	1.88	0.38	3.01	0.75							2.13	97	0.3	10	30	5	60	1.2	0.24	40	3.55543	251.459			10.3390/ma13235456
silica fume SF_D	92.11	1.88	0.38	3.01	0.75							2.13	97	0.3	10	30	5	60	1.2	0.24	40	3.73015	257.515			10.3390/ma13235456
silica fume SF_D	92.11	1.88	0.38	3.01	0.75							2.13	97	0.3	10	30	5	60	1.2	0.24	40	3.90551	263.506			10.3390/ma13235456
silica fume SF_D	92.11	1.88	0.38	3.01	0.75							2.13	97	0.3	10	30	5	60	1.2	0.24	40	4.09933	269.45			10.3390/ma13235456
silica fume SF_D	92.11	1.88	0.38	3.01	0.75							2.13	97	0.3	10	30	5	60	1.2	0.24	40	4.24459	274.225			10.3390/ma13235456
silica fume SF_D	92.11	1.88	0.38	3.01	0.75							2.13	97	0.3	10	30	5	60	1.2	0.24	40	4.43512	279.103			10.3390/ma13235456
silica fume SF_D	92.11	1.88	0.38	3.01	0.75							2.13	97	0.3	10	30	5	60	1.2	0.24	40	4.62201	283.966			10.3390/ma13235456
silica fume SF_D	92.11	1.88	0.38	3.01	0.75							2.13	97	0.3	10	30	5	60	1.2	0.24	40	4.79299	288.482			10.3390/ma13235456
silica fume SF_D	92.11	1.88	0.38	3.01	0.75							2.13	97	0.3	10	30	5	60	1.2	0.24	40	5.02699	294.745			10.3390/ma13235456
silica fume SF_D	92.11	1.88	0.38	3.01	0.75							2.13	97	0.3	10	30	5	60	1.2	0.24	40	5.18847	298.152			10.3390/ma13235456
silica fume SF_D	92.11	1.88	0.38	3.01	0.75							2.13	97	0.3	10	30	5	60	1.2	0.24	40	5.3736	302.411			10.3390/ma13235456
silica fume SF_D	92.11	1.88	0.38	3.01	0.75							2.13	97	0.3	10	30	5	60	1.2	0.24	40	5.55116	306.02			10.3390/ma13235456
silica fume SF_D	92.11	1.88	0.38	3.01	0.75							2.13	97	0.3	10	30	5	60	1.2	0.24	40	5.73643	309.69			10.3390/ma13235456
silica fume SF_D	92.11	1.88	0.38	3.01	0.75							2.13	97	0.3	10	30	5	60	1.2	0.24	40	5.91764	313.082			10.3390/ma13235456
silica fume SF_D	92.11	1.88	0.38	3.01	0.75							2.13	97	0.3	10	30	5	60	1.2	0.24	40	6.08844	316.22			10.3390/ma13235456
silica fume SF_D	92.11	1.88	0.38	3.01	0.75							2.13	97	0.3	10	30	5	60	1.2	0.24	40	6.276	319.462			10.3390/ma13235456
silica fume SF_D	92.11	1.88	0.38	3.01	0.75							2.13	97	0.3	10	30	5	60	1.2	0.24	40	6.48843	323.172			10.3390/ma13235456
silica fume SF_D	92.11	1.88	0.38	3.01	0.75							2.13	97	0.3	10	30	5	60	1.2	0.24	40	6.6686	325.925			10.3390/ma13235456
silica fume SF_D	92.11	1.88	0.38	3.01	0.75							2.13	97	0.3	10	30	5	60	1.2	0.24	40	6.84285	328.728			10.3390/ma13235456
silica fume SF_D	92.11	1.88	0.38	3.01	0.75							2.13	97	0.3	10	30	5	60	1.2	0.24	40	7	331.294			10.3390/ma13235456
stone quarry limestone LS	19.55	4.14	1.5	72.56	1.88							2.7		18	10	30	5	60	1.2	0.24	40	0.245415	26.071			10.3390/ma13235456
stone quarry limestone LS	19.55	4.14	1.5	72.56	1.88							2.7		18	10	30	5	60	1.2	0.24	40	0.350816	40.9678			10.3390/ma13235456
stone quarry limestone LS	19.55	4.14	1.5	72.56	1.88							2.7		18	10	30	5	60	1.2	0.24	40	0.440002	53.5225			10.3390/ma13235456
stone quarry limestone LS	19.55	4.14	1.5	72.56	1.88							2.7		18	10	30	5	60	1.2	0.24	40	0.529188	67.1922			10.3390/ma13235456
stone quarry limestone LS	19.55	4.14	1.5	72.56	1.88							2.7		18	10	30	5	60	1.2	0.24	40	0.594051	76.0713			10.3390/ma13235456
stone quarry limestone LS	19.55	4.14	1.5	72.56	1.88							2.7		18	10	30	5	60	1.2	0.24	40	0.772422	105.599			10.3390/ma13235456
stone quarry limestone LS	19.55	4.14	1.5	72.56	1.88							2.7		18	10	30	5	60	1.2	0.24	40	0.861608	121.417			10.3390/ma13235456
stone quarry limestone LS	19.55	4.14	1.5	72.56	1.88							2.7		18	10	30	5	60	1.2	0.24	40	0.942686	135.912			10.3390/ma13235456
stone quarry limestone LS	19.55	4.14	1.5	72.56	1.88							2.7		18	10	30	5	60	1.2	0.24	40	1.02376	150.16			10.3390/ma13235456
stone quarry limestone LS	19.55	4.14	1.5	72.56	1.88							2.7		18	10	30	5	60	1.2	0.24	40	1.11295	164.449			10.3390/ma13235456
stone quarry limestone LS	19.55	4.14	1.5	72.56	1.88							2.7		18	10	30	5	60	1.2	0.24	40	1.21024	178.388			10.3390/ma13235456
stone quarry limestone LS	19.55	4.14	1.5	72.56	1.88							2.7		18	10	30	5	60	1.2	0.24	40	1.31565	191.736			10.3390/ma13235456
stone quarry limestone LS	19.55	4.14	1.5	72.56	1.88							2.7		18	10	30	5	60	1.2	0.24	40	1.43726	205.619			10.3390/ma13235456
stone quarry limestone LS	19.55	4.14	1.5	72.56	1.88							2.7		18	10	30	5	60	1.2	0.24	40	1.5751	219.72			10.3390/ma13235456
stone quarry limestone LS	19.55	4.14	1.5	72.56	1.88							2.7		18	10	30	5	60	1.2	0.24	40	1.72104	233.211			10.3390/ma13235456
stone quarry limestone LS	19.55	4.14	1.5	72.56	1.88							2.7		18	10	30	5	60	1.2	0.24	40	1.88319	245.863			10.3390/ma13235456
stone quarry limestone LS	19.55	4.14	1.5	72.56	1.88							2.7		18	10	30	5	60	1.2	0.24	40	2.06156	257.971			10.3390/ma13235456
stone quarry limestone LS	19.55	4.14	1.5	72.56	1.88							2.7		18	10	30	5	60	1.2	0.24	40	2.23994	268.558			10.3390/ma13235456
stone quarry limestone LS	19.55	4.14	1.5	72.56	1.88							2.7		18	10	30	5	60	1.2	0.24	40	2.41831	277.625			10.3390/ma13235456
stone quarry limestone LS	19.55	4.14	1.5	72.56	1.88							2.7		18	10	30	5	60	1.2	0.24	40	2.59668	285.34			10.3390/ma13235456
stone quarry limestone LS	19.55	4.14	1.5	72.56	1.88							2.7		18	10	30	5	60	1.2	0.24	40	2.77505	292.324			10.3390/ma13235456
stone quarry limestone LS	19.55	4.14	1.5	72.56	1.88							2.7		18	10	30	5	60	1.2	0.24	40	2.95342	298.406			10.3390/ma13235456
stone quarry limestone LS	19.55	4.14	1.5	72.56	1.88							2.7		18	10	30	5	60	1.2	0.24	40	3.13179	304.094			10.3390/ma13235456
stone quarry limestone LS	19.55	4.14	1.5	72.56	1.88							2.7		18	10	30	5	60	1.2	0.24	40	3.31017	308.824			10.3390/ma13235456
stone quarry limestone LS	19.55	4.14	1.5	72.56	1.88							2.7		18	10	30	5	60	1.2	0.24	40	3.48854	313.498			10.3390/ma13235456
stone quarry limestone LS	19.55	4.14	1.5	72.56	1.88							2.7		18	10	30	5	60	1.2	0.24	40	3.66691	317.553			10.3390/ma13235456
stone quarry limestone LS	19.55	4.14	1.5	72.56	1.88							2.7		18	10	30	5	60	1.2	0.24	40	3.84528	321.101			10.3390/ma13235456
stone quarry limestone LS	19.55	4.14	1.5	72.56	1.88							2.7		18	10	30	5	60	1.2	0.24	40	4.02365	324.367			10.3390/ma13235456
stone quarry limestone LS	19.55	4.14	1.5	72.56	1.88							2.7		18	10	30	5	60	1.2	0.24	40	4.20202	327.69			10.3390/ma13235456
stone quarry limestone LS	19.55	4.14	1.5	72.56	1.88							2.7		18	10	30	5	60	1.2	0.24	40	4.3804	330.506			10.3390/ma13235456
stone quarry limestone LS	19.55	4.14	1.5	72.56	1.88							2.7		18	10	30	5	60	1.2	0.24	40	4.55877	332.984			10.3390/ma13235456
stone quarry limestone LS	19.55	4.14	1.5	72.56	1.88							2.7		18	10	30	5	60	1.2	0.24	40	4.73714	335.349			10.3390/ma13235456
stone quarry limestone LS	19.55	4.14	1.5	72.56	1.88							2.7		18	10	30	5	60	1.2	0.24	40	4.91551	337.545			10.3390/ma13235456
stone quarry limestone LS	19.55	4.14	1.5	72.56	1.88							2.7		18	10	30	5	60	1.2	0.24	40	5.09388	339.854			10.3390/ma13235456
stone quarry limestone LS	19.55	4.14	1.5	72.56	1.88							2.7		18	10	30	5	60	1.2	0.24	40	5.27225	341.825			10.3390/ma13235456
stone quarry limestone LS	19.55	4.14	1.5	72.56	1.88							2.7		18	10	30	5	60	1.2	0.24	40	5.45063	343.684			10.3390/ma13235456
stone quarry limestone LS	19.55	4.14	1.5	72.56	1.88							2.7		18	10	30	5	60	1.2	0.24	40	5.629	345.429			10.3390/ma13235456
stone quarry limestone LS	19.55	4.14	1.5	72.56	1.88							2.7		18	10	30	5	60	1.2	0.24	40	5.80737	346.894			10.3390/ma13235456
stone quarry limestone LS	19.55	4.14	1.5	72.56	1.88							2.7		18	10	30	5	60	1.2	0.24	40	5.98574	348.47			10.3390/ma13235456
stone quarry limestone LS	19.55	4.14	1.5	72.56	1.88							2.7		18	10	30	5	60	1.2	0.24	40	6.16411	349.878			10.3390/ma13235456
stone quarry limestone LS	19.55	4.14	1.5	72.56	1.88							2.7		18	10	30	5	60	1.2	0.24	40	6.34248	351.399			10.3390/ma13235456
stone quarry limestone LS	19.55	4.14	1.5	72.56	1.88							2.7		18	10	30	5	60	1.2	0.24	40	6.52086	352.863			10.3390/ma13235456
stone quarry limestone LS	19.55	4.14	1.5	72.56	1.88							2.7		18	10	30	5	60	1.2	0.24	40	6.69923	354.44			10.3390/ma13235456
stone quarry limestone LS	19.55	4.14	1.5	72.56	1.88							2.7		18	10	30	5	60	1.2	0.24	40	6.8776	355.735			10.3390/ma13235456
stone quarry limestone LS	19.55	4.14	1.5	72.56	1.88							2.7		18	10	30	5	60	1.2	0.24	40	7	356.692			10.3390/ma13235456
calcined clay C_MAR	62.41	21.43	7.14	2.26	1.88							2.26		10.7	10	30	5	60	1.2	0.24	40	0.350014	50.9611			10.3390/ma13235456
calcined clay C_MAR	62.41	21.43	7.14	2.26	1.88							2.26		10.7	10	30	5	60	1.2	0.24	40	0.477957	75.3514			10.3390/ma13235456
calcined clay C_MAR	62.41	21.43	7.14	2.26	1.88							2.26		10.7	10	30	5	60	1.2	0.24	40	0.66206	105.303			10.3390/ma13235456
calcined clay C_MAR	62.41	21.43	7.14	2.26	1.88							2.26		10.7	10	30	5	60	1.2	0.24	40	0.883562	125.371			10.3390/ma13235456
calcined clay C_MAR	62.41	21.43	7.14	2.26	1.88							2.26		10.7	10	30	5	60	1.2	0.24	40	1.17675	144.488			10.3390/ma13235456
calcined clay C_MAR	62.41	21.43	7.14	2.26	1.88							2.26		10.7	10	30	5	60	1.2	0.24	40	1.5243	159.299			10.3390/ma13235456
calcined clay C_MAR	62.41	21.43	7.14	2.26	1.88							2.26		10.7	10	30	5	60	1.2	0.24	40	1.83013	168.556			10.3390/ma13235456
calcined clay C_MAR	62.41	21.43	7.14	2.26	1.88							2.26		10.7	10	30	5	60	1.2	0.24	40	2.22148	177.022			10.3390/ma13235456
calcined clay C_MAR	62.41	21.43	7.14	2.26	1.88							2.26		10.7	10	30	5	60	1.2	0.24	40	2.52268	182.185			10.3390/ma13235456
calcined clay C_MAR	62.41	21.43	7.14	2.26	1.88							2.26		10.7	10	30	5	60	1.2	0.24	40	2.91613	187.75			10.3390/ma13235456
calcined clay C_MAR	62.41	21.43	7.14	2.26	1.88							2.26		10.7	10	30	5	60	1.2	0.24	40	3.26356	191.476			10.3390/ma13235456
calcined clay C_MAR	62.41	21.43	7.14	2.26	1.88							2.26		10.7	10	30	5	60	1.2	0.24	40	3.56379	195.03			10.3390/ma13235456
calcined clay C_MAR	62.41	21.43	7.14	2.26	1.88							2.26		10.7	10	30	5	60	1.2	0.24	40	3.88864	197.373			10.3390/ma13235456
calcined clay C_MAR	62.41	21.43	7.14	2.26	1.88							2.26		10.7	10	30	5	60	1.2	0.24	40	4.21888	200.419			10.3390/ma13235456
calcined clay C_MAR	62.41	21.43	7.14	2.26	1.88							2.26		10.7	10	30	5	60	1.2	0.24	40	4.51823	201.994			10.3390/ma13235456
calcined clay C_MAR	62.41	21.43	7.14	2.26	1.88							2.26		10.7	10	30	5	60	1.2	0.24	40	4.86746	204.702			10.3390/ma13235456
calcined clay C_MAR	62.41	21.43	7.14	2.26	1.88							2.26		10.7	10	30	5	60	1.2	0.24	40	5.178	206.222			10.3390/ma13235456
calcined clay C_MAR	62.41	21.43	7.14	2.26	1.88							2.26		10.7	10	30	5	60	1.2	0.24	40	5.522	208.423			10.3390/ma13235456
calcined clay C_MAR	62.41	21.43	7.14	2.26	1.88							2.26		10.7	10	30	5	60	1.2	0.24	40	5.82369	209.94			10.3390/ma13235456
calcined clay C_MAR	62.41	21.43	7.14	2.26	1.88							2.26		10.7	10	30	5	60	1.2	0.24	40	6.15178	211.57			10.3390/ma13235456
calcined clay C_MAR	62.41	21.43	7.14	2.26	1.88							2.26		10.7	10	30	5	60	1.2	0.24	40	6.49507	213.214			10.3390/ma13235456
calcined clay C_MAR	62.41	21.43	7.14	2.26	1.88							2.26		10.7	10	30	5	60	1.2	0.24	40	6.82274	214.568			10.3390/ma13235456
calcined clay C_MAR	62.41	21.43	7.14	2.26	1.88							2.26		10.7	10	30	5	60	1.2	0.24	40	7	214.943			10.3390/ma13235456
calcined clay C_CU_1	61.65	21.05	7.14	2.26	2.63							2.59		23.8	10	30	5	60	1.2	0.24	40	0.396321	36.1177			10.3390/ma13235456
calcined clay C_CU_1	61.65	21.05	7.14	2.26	2.63							2.59		23.8	10	30	5	60	1.2	0.24	40	0.579298	60.1351			10.3390/ma13235456
calcined clay C_CU_1	61.65	21.05	7.14	2.26	2.63							2.59		23.8	10	30	5	60	1.2	0.24	40	0.801825	85.5396			10.3390/ma13235456
calcined clay C_CU_1	61.65	21.05	7.14	2.26	2.63							2.59		23.8	10	30	5	60	1.2	0.24	40	1.19765	112.142			10.3390/ma13235456
calcined clay C_CU_1	61.65	21.05	7.14	2.26	2.63							2.59		23.8	10	30	5	60	1.2	0.24	40	1.50657	123.954			10.3390/ma13235456
calcined clay C_CU_1	61.65	21.05	7.14	2.26	2.63							2.59		23.8	10	30	5	60	1.2	0.24	40	1.82072	133.593			10.3390/ma13235456
calcined clay C_CU_1	61.65	21.05	7.14	2.26	2.63							2.59		23.8	10	30	5	60	1.2	0.24	40	2.13488	141.319			10.3390/ma13235456
calcined clay C_CU_1	61.65	21.05	7.14	2.26	2.63							2.59		23.8	10	30	5	60	1.2	0.24	40	2.44802	147.649			10.3390/ma13235456
calcined clay C_CU_1	61.65	21.05	7.14	2.26	2.63							2.59		23.8	10	30	5	60	1.2	0.24	40	2.76083	152.859			10.3390/ma13235456
calcined clay C_CU_1	61.65	21.05	7.14	2.26	2.63							2.59		23.8	10	30	5	60	1.2	0.24	40	3.07667	157.231			10.3390/ma13235456
calcined clay C_CU_1	61.65	21.05	7.14	2.26	2.63							2.59		23.8	10	30	5	60	1.2	0.24	40	3.39151	161.167			10.3390/ma13235456
calcined clay C_CU_1	61.65	21.05	7.14	2.26	2.63							2.59		23.8	10	30	5	60	1.2	0.24	40	3.70566	164.578			10.3390/ma13235456
calcined clay C_CU_1	61.65	21.05	7.14	2.26	2.63							2.59		23.8	10	30	5	60	1.2	0.24	40	4.01982	167.719			10.3390/ma13235456
calcined clay C_CU_1	61.65	21.05	7.14	2.26	2.63							2.59		23.8	10	30	5	60	1.2	0.24	40	4.33398	170.502			10.3390/ma13235456
calcined clay C_CU_1	61.65	21.05	7.14	2.26	2.63							2.59		23.8	10	30	5	60	1.2	0.24	40	4.64813	173.127			10.3390/ma13235456
calcined clay C_CU_1	61.65	21.05	7.14	2.26	2.63							2.59		23.8	10	30	5	60	1.2	0.24	40	4.96668	175.698			10.3390/ma13235456
calcined clay C_CU_1	61.65	21.05	7.14	2.26	2.63							2.59		23.8	10	30	5	60	1.2	0.24	40	5.27645	178.04			10.3390/ma13235456
calcined clay C_CU_1	61.65	21.05	7.14	2.26	2.63							2.59		23.8	10	30	5	60	1.2	0.24	40	5.5906	180.257			10.3390/ma13235456
calcined clay C_CU_1	61.65	21.05	7.14	2.26	2.63							2.59		23.8	10	30	5	60	1.2	0.24	40	5.90476	182.238			10.3390/ma13235456
calcined clay C_CU_1	61.65	21.05	7.14	2.26	2.63							2.59		23.8	10	30	5	60	1.2	0.24	40	6.21892	184.522			10.3390/ma13235456
calcined clay C_CU_1	61.65	21.05	7.14	2.26	2.63							2.59		23.8	10	30	5	60	1.2	0.24	40	6.53307	186.335			10.3390/ma13235456
calcined clay C_CU_1	61.65	21.05	7.14	2.26	2.63							2.59		23.8	10	30	5	60	1.2	0.24	40	6.84653	188.146			10.3390/ma13235456
calcined clay C_CU_1	61.65	21.05	7.14	2.26	2.63							2.59		23.8	10	30	5	60	1.2	0.24	40	7	189.655			10.3390/ma13235456
calcined clay C_CU_2	59.77	21.05	9.02	2.26	2.63							2.43		10.8	10	30	5	60	1.2	0.24	40	0.229076	19.1253			10.3390/ma13235456
calcined clay C_CU_2	59.77	21.05	9.02	2.26	2.63							2.43		10.8	10	30	5	60	1.2	0.24	40	0.391817	41.5817			10.3390/ma13235456
calcined clay C_CU_2	59.77	21.05	9.02	2.26	2.63							2.43		10.8	10	30	5	60	1.2	0.24	40	0.564097	66.2615			10.3390/ma13235456
calcined clay C_CU_2	59.77	21.05	9.02	2.26	2.63							2.43		10.8	10	30	5	60	1.2	0.24	40	0.817449	90.6524			10.3390/ma13235456
calcined clay C_CU_2	59.77	21.05	9.02	2.26	2.63							2.43		10.8	10	30	5	60	1.2	0.24	40	1.13161	105.912			10.3390/ma13235456
calcined clay C_CU_2	59.77	21.05	9.02	2.26	2.63							2.43		10.8	10	30	5	60	1.2	0.24	40	1.44576	115.339			10.3390/ma13235456
calcined clay C_CU_2	59.77	21.05	9.02	2.26	2.63							2.43		10.8	10	30	5	60	1.2	0.24	40	1.75992	122.095			10.3390/ma13235456
calcined clay C_CU_2	59.77	21.05	9.02	2.26	2.63							2.43		10.8	10	30	5	60	1.2	0.24	40	2.07408	127.091			10.3390/ma13235456
calcined clay C_CU_2	59.77	21.05	9.02	2.26	2.63							2.43		10.8	10	30	5	60	1.2	0.24	40	2.38823	130.856			10.3390/ma13235456
calcined clay C_CU_2	59.77	21.05	9.02	2.26	2.63							2.43		10.8	10	30	5	60	1.2	0.24	40	2.70239	133.988			10.3390/ma13235456
calcined clay C_CU_2	59.77	21.05	9.02	2.26	2.63							2.43		10.8	10	30	5	60	1.2	0.24	40	3.01655	136.547			10.3390/ma13235456
calcined clay C_CU_2	59.77	21.05	9.02	2.26	2.63							2.43		10.8	10	30	5	60	1.2	0.24	40	3.3307	138.768			10.3390/ma13235456
calcined clay C_CU_2	59.77	21.05	9.02	2.26	2.63							2.43		10.8	10	30	5	60	1.2	0.24	40	3.64486	140.69			10.3390/ma13235456
calcined clay C_CU_2	59.77	21.05	9.02	2.26	2.63							2.43		10.8	10	30	5	60	1.2	0.24	40	3.95902	142.475			10.3390/ma13235456
calcined clay C_CU_2	59.77	21.05	9.02	2.26	2.63							2.43		10.8	10	30	5	60	1.2	0.24	40	4.27317	144.01			10.3390/ma13235456
calcined clay C_CU_2	59.77	21.05	9.02	2.26	2.63							2.43		10.8	10	30	5	60	1.2	0.24	40	4.58733	145.458			10.3390/ma13235456
calcined clay C_CU_2	59.77	21.05	9.02	2.26	2.63							2.43		10.8	10	30	5	60	1.2	0.24	40	4.90148	146.806			10.3390/ma13235456
calcined clay C_CU_2	59.77	21.05	9.02	2.26	2.63							2.43		10.8	10	30	5	60	1.2	0.24	40	5.21564	148.016			10.3390/ma13235456
calcined clay C_CU_2	59.77	21.05	9.02	2.26	2.63							2.43		10.8	10	30	5	60	1.2	0.24	40	5.5298	149.277			10.3390/ma13235456
calcined clay C_CU_2	59.77	21.05	9.02	2.26	2.63							2.43		10.8	10	30	5	60	1.2	0.24	40	5.84395	150.592			10.3390/ma13235456
calcined clay C_CU_2	59.77	21.05	9.02	2.26	2.63							2.43		10.8	10	30	5	60	1.2	0.24	40	6.15811	151.623			10.3390/ma13235456
calcined clay C_CU_2	59.77	21.05	9.02	2.26	2.63							2.43		10.8	10	30	5	60	1.2	0.24	40	6.47227	152.722			10.3390/ma13235456
calcined clay C_CU_2	59.77	21.05	9.02	2.26	2.63							2.43		10.8	10	30	5	60	1.2	0.24	40	6.78642	153.732			10.3390/ma13235456
calcined clay C_CU_2	59.77	21.05	9.02	2.26	2.63							2.43		10.8	10	30	5	60	1.2	0.24	40	7	154.406			10.3390/ma13235456
calcined clay C_ILO	61.28	22.18	7.89	2.26	1.88							2.29		8.9	10	30	5	60	1.2	0.24	40	0.286022	34.4828			10.3390/ma13235456
calcined clay C_ILO	61.28	22.18	7.89	2.26	1.88							2.29		8.9	10	30	5	60	1.2	0.24	40	0.662366	100			10.3390/ma13235456
calcined clay C_ILO	61.28	22.18	7.89	2.26	1.88							2.29		8.9	10	30	5	60	1.2	0.24	40	1.12903	135.632			10.3390/ma13235456
calcined clay C_ILO	61.28	22.18	7.89	2.26	1.88							2.29		8.9	10	30	5	60	1.2	0.24	40	1.48492	152.103			10.3390/ma13235456
calcined clay C_ILO	61.28	22.18	7.89	2.26	1.88							2.29		8.9	10	30	5	60	1.2	0.24	40	1.77005	161.046			10.3390/ma13235456
calcined clay C_ILO	61.28	22.18	7.89	2.26	1.88							2.29		8.9	10	30	5	60	1.2	0.24	40	2.08421	169.162			10.3390/ma13235456
calcined clay C_ILO	61.28	22.18	7.89	2.26	1.88							2.29		8.9	10	30	5	60	1.2	0.24	40	2.39837	175.561			10.3390/ma13235456
calcined clay C_ILO	61.28	22.18	7.89	2.26	1.88							2.29		8.9	10	30	5	60	1.2	0.24	40	2.71252	180.886			10.3390/ma13235456
calcined clay C_ILO	61.28	22.18	7.89	2.26	1.88							2.29		8.9	10	30	5	60	1.2	0.24	40	3.02735	185.362			10.3390/ma13235456
calcined clay C_ILO	61.28	22.18	7.89	2.26	1.88							2.29		8.9	10	30	5	60	1.2	0.24	40	3.34084	189.177			10.3390/ma13235456
calcined clay C_ILO	61.28	22.18	7.89	2.26	1.88							2.29		8.9	10	30	5	60	1.2	0.24	40	3.65499	192.534			10.3390/ma13235456
calcined clay C_ILO	61.28	22.18	7.89	2.26	1.88							2.29		8.9	10	30	5	60	1.2	0.24	40	3.96915	195.529			10.3390/ma13235456
calcined clay C_ILO	61.28	22.18	7.89	2.26	1.88							2.29		8.9	10	30	5	60	1.2	0.24	40	4.28435	198.005			10.3390/ma13235456
calcined clay C_ILO	61.28	22.18	7.89	2.26	1.88							2.29		8.9	10	30	5	60	1.2	0.24	40	4.5978	200.343			10.3390/ma13235456
calcined clay C_ILO	61.28	22.18	7.89	2.26	1.88							2.29		8.9	10	30	5	60	1.2	0.24	40	4.88983	202.4			10.3390/ma13235456
calcined clay C_ILO	61.28	22.18	7.89	2.26	1.88							2.29		8.9	10	30	5	60	1.2	0.24	40	5.19537	204.445			10.3390/ma13235456
calcined clay C_ILO	61.28	22.18	7.89	2.26	1.88							2.29		8.9	10	30	5	60	1.2	0.24	40	5.38792	205.476			10.3390/ma13235456
calcined clay C_ILO	61.28	22.18	7.89	2.26	1.88							2.29		8.9	10	30	5	60	1.2	0.24	40	6.35269	212.644			10.3390/ma13235456
calcined clay C_ILO	61.28	22.18	7.89	2.26	1.88							2.29		8.9	10	30	5	60	1.2	0.24	40	7	216.092			10.3390/ma13235456
calcined clay C_ORA	65.04	19.17	6.02	2.26	2.26							2.56		13	10	30	5	60	1.2	0.24	40	0.886216	85.9587			10.3390/ma13235456
calcined clay C_ORA	65.04	19.17	6.02	2.26	2.26							2.56		13	10	30	5	60	1.2	0.24	40	1.19613	99.0464			10.3390/ma13235456
calcined clay C_ORA	65.04	19.17	6.02	2.26	2.26							2.56		13	10	30	5	60	1.2	0.24	40	1.50657	107.151			10.3390/ma13235456
calcined clay C_ORA	65.04	19.17	6.02	2.26	2.26							2.56		13	10	30	5	60	1.2	0.24	40	1.82072	113.213			10.3390/ma13235456
calcined clay C_ORA	65.04	19.17	6.02	2.26	2.26							2.56		13	10	30	5	60	1.2	0.24	40	2.13488	117.826			10.3390/ma13235456
calcined clay C_ORA	65.04	19.17	6.02	2.26	2.26							2.56		13	10	30	5	60	1.2	0.24	40	2.44904	121.483			10.3390/ma13235456
calcined clay C_ORA	65.04	19.17	6.02	2.26	2.26							2.56		13	10	30	5	60	1.2	0.24	40	2.76319	124.541			10.3390/ma13235456
calcined clay C_ORA	65.04	19.17	6.02	2.26	2.26							2.56		13	10	30	5	60	1.2	0.24	40	3.07499	127.01			10.3390/ma13235456
calcined clay C_ORA	65.04	19.17	6.02	2.26	2.26							2.56		13	10	30	5	60	1.2	0.24	40	3.39151	129.221			10.3390/ma13235456
calcined clay C_ORA	65.04	19.17	6.02	2.26	2.26							2.56		13	10	30	5	60	1.2	0.24	40	3.70566	131.205			10.3390/ma13235456
calcined clay C_ORA	65.04	19.17	6.02	2.26	2.26							2.56		13	10	30	5	60	1.2	0.24	40	4.01982	132.915			10.3390/ma13235456
calcined clay C_ORA	65.04	19.17	6.02	2.26	2.26							2.56		13	10	30	5	60	1.2	0.24	40	4.33398	134.434			10.3390/ma13235456
calcined clay C_ORA	65.04	19.17	6.02	2.26	2.26							2.56		13	10	30	5	60	1.2	0.24	40	4.64813	135.823			10.3390/ma13235456
calcined clay C_ORA	65.04	19.17	6.02	2.26	2.26							2.56		13	10	30	5	60	1.2	0.24	40	4.96229	137.009			10.3390/ma13235456
calcined clay C_ORA	65.04	19.17	6.02	2.26	2.26							2.56		13	10	30	5	60	1.2	0.24	40	5.27645	138.294			10.3390/ma13235456
calcined clay C_ORA	65.04	19.17	6.02	2.26	2.26							2.56		13	10	30	5	60	1.2	0.24	40	5.5906	139.392			10.3390/ma13235456
calcined clay C_ORA	65.04	19.17	6.02	2.26	2.26							2.56		13	10	30	5	60	1.2	0.24	40	5.90476	140.416			10.3390/ma13235456
calcined clay C_ORA	65.04	19.17	6.02	2.26	2.26							2.56		13	10	30	5	60	1.2	0.24	40	6.22027	141.252			10.3390/ma13235456
calcined clay C_ORA	65.04	19.17	6.02	2.26	2.26							2.56		13	10	30	5	60	1.2	0.24	40	6.53307	142.176			10.3390/ma13235456
calcined clay C_ORA	65.04	19.17	6.02	2.26	2.26							2.56		13	10	30	5	60	1.2	0.24	40	6.84216	143.083			10.3390/ma13235456
calcined clay C_ORA	65.04	19.17	6.02	2.26	2.26							2.56		13	10	30	5	60	1.2	0.24	40	7	143.678			10.3390/ma13235456
calcined clay C_TOP_1	64.66	20.3	6.77	1.88	1.88							2.52		12.2	10	30	5	60	1.2	0.24	40	0.153666	14.7512			10.3390/ma13235456
calcined clay C_TOP_1	64.66	20.3	6.77	1.88	1.88							2.52		12.2	10	30	5	60	1.2	0.24	40	0.315812	39.6036			10.3390/ma13235456
calcined clay C_TOP_1	64.66	20.3	6.77	1.88	1.88							2.52		12.2	10	30	5	60	1.2	0.24	40	0.452622	65.0932			10.3390/ma13235456
calcined clay C_TOP_1	64.66	20.3	6.77	1.88	1.88							2.52		12.2	10	30	5	60	1.2	0.24	40	0.604633	91.5895			10.3390/ma13235456
calcined clay C_TOP_1	64.66	20.3	6.77	1.88	1.88							2.52		12.2	10	30	5	60	1.2	0.24	40	0.83265	115.756			10.3390/ma13235456
calcined clay C_TOP_1	64.66	20.3	6.77	1.88	1.88							2.52		12.2	10	30	5	60	1.2	0.24	40	1.14174	135.569			10.3390/ma13235456
calcined clay C_TOP_1	64.66	20.3	6.77	1.88	1.88							2.52		12.2	10	30	5	60	1.2	0.24	40	1.4559	148.462			10.3390/ma13235456
calcined clay C_TOP_1	64.66	20.3	6.77	1.88	1.88							2.52		12.2	10	30	5	60	1.2	0.24	40	1.77145	157.306			10.3390/ma13235456
calcined clay C_TOP_1	64.66	20.3	6.77	1.88	1.88							2.52		12.2	10	30	5	60	1.2	0.24	40	2.08421	163.567			10.3390/ma13235456
calcined clay C_TOP_1	64.66	20.3	6.77	1.88	1.88							2.52		12.2	10	30	5	60	1.2	0.24	40	2.39837	168.588			10.3390/ma13235456
calcined clay C_TOP_1	64.66	20.3	6.77	1.88	1.88							2.52		12.2	10	30	5	60	1.2	0.24	40	2.71252	172.428			10.3390/ma13235456
calcined clay C_TOP_1	64.66	20.3	6.77	1.88	1.88							2.52		12.2	10	30	5	60	1.2	0.24	40	3.02668	175.586			10.3390/ma13235456
calcined clay C_TOP_1	64.66	20.3	6.77	1.88	1.88							2.52		12.2	10	30	5	60	1.2	0.24	40	3.34084	178.494			10.3390/ma13235456
calcined clay C_TOP_1	64.66	20.3	6.77	1.88	1.88							2.52		12.2	10	30	5	60	1.2	0.24	40	3.65432	180.771			10.3390/ma13235456
calcined clay C_TOP_1	64.66	20.3	6.77	1.88	1.88							2.52		12.2	10	30	5	60	1.2	0.24	40	3.96915	182.766			10.3390/ma13235456
calcined clay C_TOP_1	64.66	20.3	6.77	1.88	1.88							2.52		12.2	10	30	5	60	1.2	0.24	40	4.27925	184.606			10.3390/ma13235456
calcined clay C_TOP_1	64.66	20.3	6.77	1.88	1.88							2.52		12.2	10	30	5	60	1.2	0.24	40	4.59746	186.344			10.3390/ma13235456
calcined clay C_TOP_1	64.66	20.3	6.77	1.88	1.88							2.52		12.2	10	30	5	60	1.2	0.24	40	4.91162	187.841			10.3390/ma13235456
calcined clay C_TOP_1	64.66	20.3	6.77	1.88	1.88							2.52		12.2	10	30	5	60	1.2	0.24	40	5.22578	188.99			10.3390/ma13235456
calcined clay C_TOP_1	64.66	20.3	6.77	1.88	1.88							2.52		12.2	10	30	5	60	1.2	0.24	40	5.53993	190.412			10.3390/ma13235456
calcined clay C_TOP_1	64.66	20.3	6.77	1.88	1.88							2.52		12.2	10	30	5	60	1.2	0.24	40	5.85409	191.735			10.3390/ma13235456
calcined clay C_TOP_1	64.66	20.3	6.77	1.88	1.88							2.52		12.2	10	30	5	60	1.2	0.24	40	6.16825	192.821			10.3390/ma13235456
calcined clay C_TOP_1	64.66	20.3	6.77	1.88	1.88							2.52		12.2	10	30	5	60	1.2	0.24	40	6.4824	194.036			10.3390/ma13235456
calcined clay C_TOP_1	64.66	20.3	6.77	1.88	1.88							2.52		12.2	10	30	5	60	1.2	0.24	40	6.79656	195.159			10.3390/ma13235456
calcined clay C_TOP_1	64.66	20.3	6.77	1.88	1.88							2.52		12.2	10	30	5	60	1.2	0.24	40	7	195.707			10.3390/ma13235456
calcined clay C_TOP_2	65.04	20.68	6.02	1.88	1.88							2.5		10	10	30	5	60	1.2	0.24	40	0.155849	18.0303			10.3390/ma13235456
calcined clay C_TOP_2	65.04	20.68	6.02	1.88	1.88							2.5		10	10	30	5	60	1.2	0.24	40	0.31278	42.5292			10.3390/ma13235456
calcined clay C_TOP_2	65.04	20.68	6.02	1.88	1.88							2.5		10	10	30	5	60	1.2	0.24	40	0.464649	68.5247			10.3390/ma13235456
calcined clay C_TOP_2	65.04	20.68	6.02	1.88	1.88							2.5		10	10	30	5	60	1.2	0.24	40	0.646891	94.4736			10.3390/ma13235456
calcined clay C_TOP_2	65.04	20.68	6.02	1.88	1.88							2.5		10	10	30	5	60	1.2	0.24	40	0.910131	116.41			10.3390/ma13235456
calcined clay C_TOP_2	65.04	20.68	6.02	1.88	1.88							2.5		10	10	30	5	60	1.2	0.24	40	1.22399	132.253			10.3390/ma13235456
calcined clay C_TOP_2	65.04	20.68	6.02	1.88	1.88							2.5		10	10	30	5	60	1.2	0.24	40	1.53785	143.086			10.3390/ma13235456
calcined clay C_TOP_2	65.04	20.68	6.02	1.88	1.88							2.5		10	10	30	5	60	1.2	0.24	40	1.85172	150.882			10.3390/ma13235456
calcined clay C_TOP_2	65.04	20.68	6.02	1.88	1.88							2.5		10	10	30	5	60	1.2	0.24	40	2.16558	156.842			10.3390/ma13235456
calcined clay C_TOP_2	65.04	20.68	6.02	1.88	1.88							2.5		10	10	30	5	60	1.2	0.24	40	2.47944	161.615			10.3390/ma13235456
calcined clay C_TOP_2	65.04	20.68	6.02	1.88	1.88							2.5		10	10	30	5	60	1.2	0.24	40	2.7933	165.551			10.3390/ma13235456
calcined clay C_TOP_2	65.04	20.68	6.02	1.88	1.88							2.5		10	10	30	5	60	1.2	0.24	40	3.10717	168.962			10.3390/ma13235456
calcined clay C_TOP_2	65.04	20.68	6.02	1.88	1.88							2.5		10	10	30	5	60	1.2	0.24	40	3.42103	171.886			10.3390/ma13235456
calcined clay C_TOP_2	65.04	20.68	6.02	1.88	1.88							2.5		10	10	30	5	60	1.2	0.24	40	3.73455	174.313			10.3390/ma13235456
calcined clay C_TOP_2	65.04	20.68	6.02	1.88	1.88							2.5		10	10	30	5	60	1.2	0.24	40	4.04875	176.634			10.3390/ma13235456
calcined clay C_TOP_2	65.04	20.68	6.02	1.88	1.88							2.5		10	10	30	5	60	1.2	0.24	40	4.36261	178.708			10.3390/ma13235456
calcined clay C_TOP_2	65.04	20.68	6.02	1.88	1.88							2.5		10	10	30	5	60	1.2	0.24	40	4.67648	180.67			10.3390/ma13235456
calcined clay C_TOP_2	65.04	20.68	6.02	1.88	1.88							2.5		10	10	30	5	60	1.2	0.24	40	4.99034	182.494			10.3390/ma13235456
calcined clay C_TOP_2	65.04	20.68	6.02	1.88	1.88							2.5		10	10	30	5	60	1.2	0.24	40	5.3042	184.193			10.3390/ma13235456
calcined clay C_TOP_2	65.04	20.68	6.02	1.88	1.88							2.5		10	10	30	5	60	1.2	0.24	40	5.60288	185.704			10.3390/ma13235456
calcined clay C_TOP_2	65.04	20.68	6.02	1.88	1.88							2.5		10	10	30	5	60	1.2	0.24	40	5.92312	187.307			10.3390/ma13235456
calcined clay C_TOP_2	65.04	20.68	6.02	1.88	1.88							2.5		10	10	30	5	60	1.2	0.24	40	6.33944	188.989			10.3390/ma13235456
calcined clay C_TOP_2	65.04	20.68	6.02	1.88	1.88							2.5		10	10	30	5	60	1.2	0.24	40	6.59463	190.173			10.3390/ma13235456
calcined clay C_TOP_2	65.04	20.68	6.02	1.88	1.88							2.5		10	10	30	5	60	1.2	0.24	40	7	190.96			10.3390/ma13235456
calcined clay C_KaVa_1	63.16	25.19	3.01	1.88	1.5							2.57		8.6	10	30	5	60	1.2	0.24	40	0.464649	89.4113			10.3390/ma13235456
calcined clay C_KaVa_1	63.16	25.19	3.01	1.88	1.5							2.57		8.6	10	30	5	60	1.2	0.24	40	0.611455	113.23			10.3390/ma13235456
calcined clay C_KaVa_1	63.16	25.19	3.01	1.88	1.5							2.57		8.6	10	30	5	60	1.2	0.24	40	0.808885	136.862			10.3390/ma13235456
calcined clay C_KaVa_1	63.16	25.19	3.01	1.88	1.5							2.57		8.6	10	30	5	60	1.2	0.24	40	1.08225	159.564			10.3390/ma13235456
calcined clay C_KaVa_1	63.16	25.19	3.01	1.88	1.5							2.57		8.6	10	30	5	60	1.2	0.24	40	1.39611	176.388			10.3390/ma13235456
calcined clay C_KaVa_1	63.16	25.19	3.01	1.88	1.5							2.57		8.6	10	30	5	60	1.2	0.24	40	1.70997	187.379			10.3390/ma13235456
calcined clay C_KaVa_1	63.16	25.19	3.01	1.88	1.5							2.57		8.6	10	30	5	60	1.2	0.24	40	2.02384	194.863			10.3390/ma13235456
calcined clay C_KaVa_1	63.16	25.19	3.01	1.88	1.5							2.57		8.6	10	30	5	60	1.2	0.24	40	2.3377	200.065			10.3390/ma13235456
calcined clay C_KaVa_1	63.16	25.19	3.01	1.88	1.5							2.57		8.6	10	30	5	60	1.2	0.24	40	2.65156	203.785			10.3390/ma13235456
calcined clay C_KaVa_1	63.16	25.19	3.01	1.88	1.5							2.57		8.6	10	30	5	60	1.2	0.24	40	2.96542	206.583			10.3390/ma13235456
calcined clay C_KaVa_1	63.16	25.19	3.01	1.88	1.5							2.57		8.6	10	30	5	60	1.2	0.24	40	3.27928	208.72			10.3390/ma13235456
calcined clay C_KaVa_1	63.16	25.19	3.01	1.88	1.5							2.57		8.6	10	30	5	60	1.2	0.24	40	3.59315	210.594			10.3390/ma13235456
calcined clay C_KaVa_1	63.16	25.19	3.01	1.88	1.5							2.57		8.6	10	30	5	60	1.2	0.24	40	3.90701	211.969			10.3390/ma13235456
calcined clay C_KaVa_1	63.16	25.19	3.01	1.88	1.5							2.57		8.6	10	30	5	60	1.2	0.24	40	4.22087	213.343			10.3390/ma13235456
calcined clay C_KaVa_1	63.16	25.19	3.01	1.88	1.5							2.57		8.6	10	30	5	60	1.2	0.24	40	4.53473	214.555			10.3390/ma13235456
calcined clay C_KaVa_1	63.16	25.19	3.01	1.88	1.5							2.57		8.6	10	30	5	60	1.2	0.24	40	4.8486	215.554			10.3390/ma13235456
calcined clay C_KaVa_1	63.16	25.19	3.01	1.88	1.5							2.57		8.6	10	30	5	60	1.2	0.24	40	5.16246	216.479			10.3390/ma13235456
calcined clay C_KaVa_1	63.16	25.19	3.01	1.88	1.5							2.57		8.6	10	30	5	60	1.2	0.24	40	5.47632	217.566			10.3390/ma13235456
calcined clay C_KaVa_1	63.16	25.19	3.01	1.88	1.5							2.57		8.6	10	30	5	60	1.2	0.24	40	5.79018	218.453			10.3390/ma13235456
calcined clay C_KaVa_1	63.16	25.19	3.01	1.88	1.5							2.57		8.6	10	30	5	60	1.2	0.24	40	6.10404	219.303			10.3390/ma13235456
calcined clay C_KaVa_1	63.16	25.19	3.01	1.88	1.5							2.57		8.6	10	30	5	60	1.2	0.24	40	6.41791	220.103			10.3390/ma13235456
calcined clay C_KaVa_1	63.16	25.19	3.01	1.88	1.5							2.57		8.6	10	30	5	60	1.2	0.24	40	6.72839	220.844			10.3390/ma13235456
calcined clay C_KaVa_1	63.16	25.19	3.01	1.88	1.5							2.57		8.6	10	30	5	60	1.2	0.24	40	7	221.477			10.3390/ma13235456
calcined clay C_KaVa_2	63.91	24.44	3.38	1.88	1.5							2.57		8.2	10	30	5	60	1.2	0.24	40	0.226721	34.0724			10.3390/ma13235456
calcined clay C_KaVa_2	63.91	24.44	3.38	1.88	1.5							2.57		8.2	10	30	5	60	1.2	0.24	40	0.343154	58.1633			10.3390/ma13235456
calcined clay C_KaVa_2	63.91	24.44	3.38	1.88	1.5							2.57		8.2	10	30	5	60	1.2	0.24	40	0.469711	84.1464			10.3390/ma13235456
calcined clay C_KaVa_2	63.91	24.44	3.38	1.88	1.5							2.57		8.2	10	30	5	60	1.2	0.24	40	0.646891	109.187			10.3390/ma13235456
calcined clay C_KaVa_2	63.91	24.44	3.38	1.88	1.5							2.57		8.2	10	30	5	60	1.2	0.24	40	0.910131	132.045			10.3390/ma13235456
calcined clay C_KaVa_2	63.91	24.44	3.38	1.88	1.5							2.57		8.2	10	30	5	60	1.2	0.24	40	1.22399	149.604			10.3390/ma13235456
calcined clay C_KaVa_2	63.91	24.44	3.38	1.88	1.5							2.57		8.2	10	30	5	60	1.2	0.24	40	1.53785	160.534			10.3390/ma13235456
calcined clay C_KaVa_2	63.91	24.44	3.38	1.88	1.5							2.57		8.2	10	30	5	60	1.2	0.24	40	1.85172	168.025			10.3390/ma13235456
calcined clay C_KaVa_2	63.91	24.44	3.38	1.88	1.5							2.57		8.2	10	30	5	60	1.2	0.24	40	2.16558	173.048			10.3390/ma13235456
calcined clay C_KaVa_2	63.91	24.44	3.38	1.88	1.5							2.57		8.2	10	30	5	60	1.2	0.24	40	2.47944	176.696			10.3390/ma13235456
calcined clay C_KaVa_2	63.91	24.44	3.38	1.88	1.5							2.57		8.2	10	30	5	60	1.2	0.24	40	2.7933	179.32			10.3390/ma13235456
calcined clay C_KaVa_2	63.91	24.44	3.38	1.88	1.5							2.57		8.2	10	30	5	60	1.2	0.24	40	3.10717	181.419			10.3390/ma13235456
calcined clay C_KaVa_2	63.91	24.44	3.38	1.88	1.5							2.57		8.2	10	30	5	60	1.2	0.24	40	3.42103	182.981			10.3390/ma13235456
calcined clay C_KaVa_2	63.91	24.44	3.38	1.88	1.5							2.57		8.2	10	30	5	60	1.2	0.24	40	3.73489	184.543			10.3390/ma13235456
calcined clay C_KaVa_2	63.91	24.44	3.38	1.88	1.5							2.57		8.2	10	30	5	60	1.2	0.24	40	4.04875	185.717			10.3390/ma13235456
calcined clay C_KaVa_2	63.91	24.44	3.38	1.88	1.5							2.57		8.2	10	30	5	60	1.2	0.24	40	4.36261	186.692			10.3390/ma13235456
calcined clay C_KaVa_2	63.91	24.44	3.38	1.88	1.5							2.57		8.2	10	30	5	60	1.2	0.24	40	4.67648	187.754			10.3390/ma13235456
calcined clay C_KaVa_2	63.91	24.44	3.38	1.88	1.5							2.57		8.2	10	30	5	60	1.2	0.24	40	4.99034	188.729			10.3390/ma13235456
calcined clay C_KaVa_2	63.91	24.44	3.38	1.88	1.5							2.57		8.2	10	30	5	60	1.2	0.24	40	5.3042	189.616			10.3390/ma13235456
calcined clay C_KaVa_2	63.91	24.44	3.38	1.88	1.5							2.57		8.2	10	30	5	60	1.2	0.24	40	5.61806	190.315			10.3390/ma13235456
calcined clay C_KaVa_2	63.91	24.44	3.38	1.88	1.5							2.57		8.2	10	30	5	60	1.2	0.24	40	5.93193	191.103			10.3390/ma13235456
calcined clay C_KaVa_2	63.91	24.44	3.38	1.88	1.5							2.57		8.2	10	30	5	60	1.2	0.24	40	6.24579	192.002			10.3390/ma13235456
calcined clay C_KaVa_2	63.91	24.44	3.38	1.88	1.5							2.57		8.2	10	30	5	60	1.2	0.24	40	6.55965	192.877			10.3390/ma13235456
calcined clay C_KaVa_2	63.91	24.44	3.38	1.88	1.5							2.57		8.2	10	30	5	60	1.2	0.24	40	7	193.489			10.3390/ma13235456
calcined clay C_NC_1	63.91	19.92	6.77	2.26	2.26							2.12		13.4	10	30	5	60	1.2	0.24	40	0.77675	89.4638			10.3390/ma13235456
calcined clay C_NC_1	63.91	19.92	6.77	2.26	2.26							2.12		13.4	10	30	5	60	1.2	0.24	40	1.05187	108.642			10.3390/ma13235456
calcined clay C_NC_1	63.91	19.92	6.77	2.26	2.26							2.12		13.4	10	30	5	60	1.2	0.24	40	1.36574	124.094			10.3390/ma13235456
calcined clay C_NC_1	63.91	19.92	6.77	2.26	2.26							2.12		13.4	10	30	5	60	1.2	0.24	40	1.6796	135.651			10.3390/ma13235456
calcined clay C_NC_1	63.91	19.92	6.77	2.26	2.26							2.12		13.4	10	30	5	60	1.2	0.24	40	1.99346	144.51			10.3390/ma13235456
calcined clay C_NC_1	63.91	19.92	6.77	2.26	2.26							2.12		13.4	10	30	5	60	1.2	0.24	40	2.30732	151.47			10.3390/ma13235456
calcined clay C_NC_1	63.91	19.92	6.77	2.26	2.26							2.12		13.4	10	30	5	60	1.2	0.24	40	2.62119	157.092			10.3390/ma13235456
calcined clay C_NC_1	63.91	19.92	6.77	2.26	2.26							2.12		13.4	10	30	5	60	1.2	0.24	40	2.93505	161.778			10.3390/ma13235456
calcined clay C_NC_1	63.91	19.92	6.77	2.26	2.26							2.12		13.4	10	30	5	60	1.2	0.24	40	3.24891	165.689			10.3390/ma13235456
calcined clay C_NC_1	63.91	19.92	6.77	2.26	2.26							2.12		13.4	10	30	5	60	1.2	0.24	40	3.56277	169.037			10.3390/ma13235456
calcined clay C_NC_1	63.91	19.92	6.77	2.26	2.26							2.12		13.4	10	30	5	60	1.2	0.24	40	3.87663	171.923			10.3390/ma13235456
calcined clay C_NC_1	63.91	19.92	6.77	2.26	2.26							2.12		13.4	10	30	5	60	1.2	0.24	40	4.1905	174.497			10.3390/ma13235456
calcined clay C_NC_1	63.91	19.92	6.77	2.26	2.26							2.12		13.4	10	30	5	60	1.2	0.24	40	4.50436	176.846			10.3390/ma13235456
calcined clay C_NC_1	63.91	19.92	6.77	2.26	2.26							2.12		13.4	10	30	5	60	1.2	0.24	40	4.81822	178.845			10.3390/ma13235456
calcined clay C_NC_1	63.91	19.92	6.77	2.26	2.26							2.12		13.4	10	30	5	60	1.2	0.24	40	5.13208	180.844			10.3390/ma13235456
calcined clay C_NC_1	63.91	19.92	6.77	2.26	2.26							2.12		13.4	10	30	5	60	1.2	0.24	40	5.44595	182.544			10.3390/ma13235456
calcined clay C_NC_1	63.91	19.92	6.77	2.26	2.26							2.12		13.4	10	30	5	60	1.2	0.24	40	5.75981	184.293			10.3390/ma13235456
calcined clay C_NC_1	63.91	19.92	6.77	2.26	2.26							2.12		13.4	10	30	5	60	1.2	0.24	40	6.07367	185.83			10.3390/ma13235456
calcined clay C_NC_1	63.91	19.92	6.77	2.26	2.26							2.12		13.4	10	30	5	60	1.2	0.24	40	6.38753	187.292			10.3390/ma13235456
calcined clay C_NC_1	63.91	19.92	6.77	2.26	2.26							2.12		13.4	10	30	5	60	1.2	0.24	40	6.70139	188.754			10.3390/ma13235456
calcined clay C_NC_1	63.91	19.92	6.77	2.26	2.26							2.12		13.4	10	30	5	60	1.2	0.24	40	7	189.651			10.3390/ma13235456
calcined clay C_NC_2	62.41	21.05	6.02	4.51	2.26							2.41		15.4	10	30	5	60	1.2	0.24	40	0.325074	26.1505			10.3390/ma13235456
calcined clay C_NC_2	62.41	21.05	6.02	4.51	2.26							2.41		15.4	10	30	5	60	1.2	0.24	40	0.474773	43.6911			10.3390/ma13235456
calcined clay C_NC_2	62.41	21.05	6.02	4.51	2.26							2.41		15.4	10	30	5	60	1.2	0.24	40	0.778511	82.0113			10.3390/ma13235456
calcined clay C_NC_2	62.41	21.05	6.02	4.51	2.26							2.41		15.4	10	30	5	60	1.2	0.24	40	1.20374	119.653			10.3390/ma13235456
calcined clay C_NC_2	62.41	21.05	6.02	4.51	2.26							2.41		15.4	10	30	5	60	1.2	0.24	40	1.46698	137.524			10.3390/ma13235456
calcined clay C_NC_2	62.41	21.05	6.02	4.51	2.26							2.41		15.4	10	30	5	60	1.2	0.24	40	1.80109	156.921			10.3390/ma13235456
calcined clay C_NC_2	62.41	21.05	6.02	4.51	2.26							2.41		15.4	10	30	5	60	1.2	0.24	40	2.10175	170.742			10.3390/ma13235456
calcined clay C_NC_2	62.41	21.05	6.02	4.51	2.26							2.41		15.4	10	30	5	60	1.2	0.24	40	2.42882	182.735			10.3390/ma13235456
calcined clay C_NC_2	62.41	21.05	6.02	4.51	2.26							2.41		15.4	10	30	5	60	1.2	0.24	40	2.74268	192.102			10.3390/ma13235456
calcined clay C_NC_2	62.41	21.05	6.02	4.51	2.26							2.41		15.4	10	30	5	60	1.2	0.24	40	3.05654	199.732			10.3390/ma13235456
calcined clay C_NC_2	62.41	21.05	6.02	4.51	2.26							2.41		15.4	10	30	5	60	1.2	0.24	40	3.37041	205.746			10.3390/ma13235456
calcined clay C_NC_2	62.41	21.05	6.02	4.51	2.26							2.41		15.4	10	30	5	60	1.2	0.24	40	3.76639	213.171			10.3390/ma13235456
calcined clay C_NC_2	62.41	21.05	6.02	4.51	2.26							2.41		15.4	10	30	5	60	1.2	0.24	40	3.99813	215.971			10.3390/ma13235456
calcined clay C_NC_2	62.41	21.05	6.02	4.51	2.26							2.41		15.4	10	30	5	60	1.2	0.24	40	4.31199	219.74			10.3390/ma13235456
calcined clay C_NC_2	62.41	21.05	6.02	4.51	2.26							2.41		15.4	10	30	5	60	1.2	0.24	40	4.62585	223.164			10.3390/ma13235456
calcined clay C_NC_2	62.41	21.05	6.02	4.51	2.26							2.41		15.4	10	30	5	60	1.2	0.24	40	4.93972	226.129			10.3390/ma13235456
calcined clay C_NC_2	62.41	21.05	6.02	4.51	2.26							2.41		15.4	10	30	5	60	1.2	0.24	40	5.25358	228.874			10.3390/ma13235456
calcined clay C_NC_2	62.41	21.05	6.02	4.51	2.26							2.41		15.4	10	30	5	60	1.2	0.24	40	5.56744	231.31			10.3390/ma13235456
calcined clay C_NC_2	62.41	21.05	6.02	4.51	2.26							2.41		15.4	10	30	5	60	1.2	0.24	40	5.8813	233.497			10.3390/ma13235456
calcined clay C_NC_2	62.41	21.05	6.02	4.51	2.26							2.41		15.4	10	30	5	60	1.2	0.24	40	6.19517	235.604			10.3390/ma13235456
calcined clay C_NC_2	62.41	21.05	6.02	4.51	2.26							2.41		15.4	10	30	5	60	1.2	0.24	40	6.50903	237.441			10.3390/ma13235456
calcined clay C_NC_2	62.41	21.05	6.02	4.51	2.26							2.41		15.4	10	30	5	60	1.2	0.24	40	6.82289	239.294			10.3390/ma13235456
calcined clay C_NC_2	62.41	21.05	6.02	4.51	2.26							2.41		15.4	10	30	5	60	1.2	0.24	40	7	239.682			10.3390/ma13235456
calcined clay C_SlVk	64.29	19.55	6.39	2.26	2.26							2.5		14.1	10	30	5	60	1.2	0.24	40	0.292531	26.2443			10.3390/ma13235456
calcined clay C_SlVk	64.29	19.55	6.39	2.26	2.26							2.5		14.1	10	30	5	60	1.2	0.24	40	0.515272	51.5761			10.3390/ma13235456
calcined clay C_SlVk	64.29	19.55	6.39	2.26	2.26							2.5		14.1	10	30	5	60	1.2	0.24	40	0.753199	75.8199			10.3390/ma13235456
calcined clay C_SlVk	64.29	19.55	6.39	2.26	2.26							2.5		14.1	10	30	5	60	1.2	0.24	40	1.04175	96.7641			10.3390/ma13235456
calcined clay C_SlVk	64.29	19.55	6.39	2.26	2.26							2.5		14.1	10	30	5	60	1.2	0.24	40	1.35561	111.299			10.3390/ma13235456
calcined clay C_SlVk	64.29	19.55	6.39	2.26	2.26							2.5		14.1	10	30	5	60	1.2	0.24	40	1.66947	121.645			10.3390/ma13235456
calcined clay C_SlVk	64.29	19.55	6.39	2.26	2.26							2.5		14.1	10	30	5	60	1.2	0.24	40	1.98334	129.529			10.3390/ma13235456
calcined clay C_SlVk	64.29	19.55	6.39	2.26	2.26							2.5		14.1	10	30	5	60	1.2	0.24	40	2.2972	135.876			10.3390/ma13235456
calcined clay C_SlVk	64.29	19.55	6.39	2.26	2.26							2.5		14.1	10	30	5	60	1.2	0.24	40	2.61106	140.924			10.3390/ma13235456
calcined clay C_SlVk	64.29	19.55	6.39	2.26	2.26							2.5		14.1	10	30	5	60	1.2	0.24	40	2.92492	145.072			10.3390/ma13235456
calcined clay C_SlVk	64.29	19.55	6.39	2.26	2.26							2.5		14.1	10	30	5	60	1.2	0.24	40	3.23879	148.546			10.3390/ma13235456
calcined clay C_SlVk	64.29	19.55	6.39	2.26	2.26							2.5		14.1	10	30	5	60	1.2	0.24	40	3.55265	151.607			10.3390/ma13235456
calcined clay C_SlVk	64.29	19.55	6.39	2.26	2.26							2.5		14.1	10	30	5	60	1.2	0.24	40	3.86651	154.231			10.3390/ma13235456
calcined clay C_SlVk	64.29	19.55	6.39	2.26	2.26							2.5		14.1	10	30	5	60	1.2	0.24	40	4.18037	156.505			10.3390/ma13235456
calcined clay C_SlVk	64.29	19.55	6.39	2.26	2.26							2.5		14.1	10	30	5	60	1.2	0.24	40	4.49423	158.654			10.3390/ma13235456
calcined clay C_SlVk	64.29	19.55	6.39	2.26	2.26							2.5		14.1	10	30	5	60	1.2	0.24	40	4.8081	160.516			10.3390/ma13235456
calcined clay C_SlVk	64.29	19.55	6.39	2.26	2.26							2.5		14.1	10	30	5	60	1.2	0.24	40	5.12196	162.24			10.3390/ma13235456
calcined clay C_SlVk	64.29	19.55	6.39	2.26	2.26							2.5		14.1	10	30	5	60	1.2	0.24	40	5.43582	163.889			10.3390/ma13235456
calcined clay C_SlVk	64.29	19.55	6.39	2.26	2.26							2.5		14.1	10	30	5	60	1.2	0.24	40	5.74968	165.351			10.3390/ma13235456
calcined clay C_SlVk	64.29	19.55	6.39	2.26	2.26							2.5		14.1	10	30	5	60	1.2	0.24	40	6.06355	166.826			10.3390/ma13235456
calcined clay C_SlVk	64.29	19.55	6.39	2.26	2.26							2.5		14.1	10	30	5	60	1.2	0.24	40	6.37741	168.212			10.3390/ma13235456
calcined clay C_SlVk	64.29	19.55	6.39	2.26	2.26							2.5		14.1	10	30	5	60	1.2	0.24	40	6.69127	169.424			10.3390/ma13235456
calcined clay C_SlVk	64.29	19.55	6.39	2.26	2.26							2.5		14.1	10	30	5	60	1.2	0.24	40	7	170.46			10.3390/ma13235456
calcined clay C_IGM	64.29	19.92	6.39	2.26	1.88							2.57		15.4	10	30	5	60	1.2	0.24	40	0.317842	33.33			10.3390/ma13235456
calcined clay C_IGM	64.29	19.92	6.39	2.26	1.88							2.57		15.4	10	30	5	60	1.2	0.24	40	0.515272	58.1611			10.3390/ma13235456
calcined clay C_IGM	64.29	19.92	6.39	2.26	1.88							2.57		15.4	10	30	5	60	1.2	0.24	40	0.743075	82.8237			10.3390/ma13235456
calcined clay C_IGM	64.29	19.92	6.39	2.26	1.88							2.57		15.4	10	30	5	60	1.2	0.24	40	1.03163	102.724			10.3390/ma13235456
calcined clay C_IGM	64.29	19.92	6.39	2.26	1.88							2.57		15.4	10	30	5	60	1.2	0.24	40	1.34549	115.848			10.3390/ma13235456
calcined clay C_IGM	64.29	19.92	6.39	2.26	1.88							2.57		15.4	10	30	5	60	1.2	0.24	40	1.65935	125.431			10.3390/ma13235456
calcined clay C_IGM	64.29	19.92	6.39	2.26	1.88							2.57		15.4	10	30	5	60	1.2	0.24	40	1.97321	132.669			10.3390/ma13235456
calcined clay C_IGM	64.29	19.92	6.39	2.26	1.88							2.57		15.4	10	30	5	60	1.2	0.24	40	2.28707	138.613			10.3390/ma13235456
calcined clay C_IGM	64.29	19.92	6.39	2.26	1.88							2.57		15.4	10	30	5	60	1.2	0.24	40	2.60094	143.486			10.3390/ma13235456
calcined clay C_IGM	64.29	19.92	6.39	2.26	1.88							2.57		15.4	10	30	5	60	1.2	0.24	40	2.9148	147.509			10.3390/ma13235456
calcined clay C_IGM	64.29	19.92	6.39	2.26	1.88							2.57		15.4	10	30	5	60	1.2	0.24	40	3.22866	150.995			10.3390/ma13235456
calcined clay C_IGM	64.29	19.92	6.39	2.26	1.88							2.57		15.4	10	30	5	60	1.2	0.24	40	3.54252	153.931			10.3390/ma13235456
calcined clay C_IGM	64.29	19.92	6.39	2.26	1.88							2.57		15.4	10	30	5	60	1.2	0.24	40	3.85639	156.53			10.3390/ma13235456
calcined clay C_IGM	64.29	19.92	6.39	2.26	1.88							2.57		15.4	10	30	5	60	1.2	0.24	40	4.17025	158.754			10.3390/ma13235456
calcined clay C_IGM	64.29	19.92	6.39	2.26	1.88							2.57		15.4	10	30	5	60	1.2	0.24	40	4.47688	160.776			10.3390/ma13235456
calcined clay C_IGM	64.29	19.92	6.39	2.26	1.88							2.57		15.4	10	30	5	60	1.2	0.24	40	4.78663	162.556			10.3390/ma13235456
calcined clay C_IGM	64.29	19.92	6.39	2.26	1.88							2.57		15.4	10	30	5	60	1.2	0.24	40	5.12196	164.427			10.3390/ma13235456
calcined clay C_IGM	64.29	19.92	6.39	2.26	1.88							2.57		15.4	10	30	5	60	1.2	0.24	40	5.44112	166.088			10.3390/ma13235456
calcined clay C_IGM	64.29	19.92	6.39	2.26	1.88							2.57		15.4	10	30	5	60	1.2	0.24	40	5.75283	167.504			10.3390/ma13235456
calcined clay C_IGM	64.29	19.92	6.39	2.26	1.88							2.57		15.4	10	30	5	60	1.2	0.24	40	6.03106	168.816			10.3390/ma13235456
calcined clay C_IGM	64.29	19.92	6.39	2.26	1.88							2.57		15.4	10	30	5	60	1.2	0.24	40	6.37445	170.317			10.3390/ma13235456
calcined clay C_IGM	64.29	19.92	6.39	2.26	1.88							2.57		15.4	10	30	5	60	1.2	0.24	40	6.69667	171.563			10.3390/ma13235456
calcined clay C_IGM	64.29	19.92	6.39	2.26	1.88							2.57		15.4	10	30	5	60	1.2	0.24	40	7	172.286			10.3390/ma13235456
Greenstone powder quarry by-product	43.2	10.1	13.8	6.5	4.2		2.2		1.4	2		2.93		1240	10	30	0	36	0	1.51	50	10		0.05		Characterization of Quarry By-Products as a Partial Replacement of Cement in Cementitious Composites (https://vtechworks.lib.vt.edu/items/ac593385-ee07-4489-a031-2bc72c06c401)
granite powder quarry by-product	75.3	13.2	2.1	1.7	0.4		0.3		4.6	3.2		2.66		933	10	30	0	36	0	1.51	50	10		0.06		Characterization of Quarry By-Products as a Partial Replacement of Cement in Cementitious Composites (https://vtechworks.lib.vt.edu/items/ac593385-ee07-4489-a031-2bc72c06c401)
granite powder quarry by-product	55.8	15.3	11.7	9.1	8		1		0.7	2.3		2.94		24.3	10	30	0	36	0	1.51	50	10		0.13		Characterization of Quarry By-Products as a Partial Replacement of Cement in Cementitious Composites (https://vtechworks.lib.vt.edu/items/ac593385-ee07-4489-a031-2bc72c06c401)
granite powder quarry by-product	71.7	13.6	4.1	2.8	1.8		0.7		3.9	2.8		2.73		1060	10	30	0	36	0	1.51	50	10		0.15		Characterization of Quarry By-Products as a Partial Replacement of Cement in Cementitious Composites (https://vtechworks.lib.vt.edu/items/ac593385-ee07-4489-a031-2bc72c06c401)
granite powder quarry by-product	71	14.1	3.3	3	1.2		0.5		4.3	2.8		2.76		27.1	10	30	0	36	0	1.51	50	10		0.18		Characterization of Quarry By-Products as a Partial Replacement of Cement in Cementitious Composites (https://vtechworks.lib.vt.edu/items/ac593385-ee07-4489-a031-2bc72c06c401)
limestone powder quarry by-product	18.6	3.8	2	57.8	3.6		0.2		0.9	0.1		2.79		136.2	10	30	0	36	0	1.51	50	10		0.48		Characterization of Quarry By-Products as a Partial Replacement of Cement in Cementitious Composites (https://vtechworks.lib.vt.edu/items/ac593385-ee07-4489-a031-2bc72c06c401)
limestone powder quarry by-product	24	6.2	2.8	51	4		0.4		1.4	0.2		2.75		1536	10	30	0	36	0	1.51	50	10		0.65		Characterization of Quarry By-Products as a Partial Replacement of Cement in Cementitious Composites (https://vtechworks.lib.vt.edu/items/ac593385-ee07-4489-a031-2bc72c06c401)
granite powder quarry by-product	71	14.1	3.3	3	1.2		0.5		4.3	2.8		2.76		27.1	10	30	0	36	0	1.51	50	10	154			Characterization of Quarry By-Products as a Partial Replacement of Cement in Cementitious Composites (https://vtechworks.lib.vt.edu/items/ac593385-ee07-4489-a031-2bc72c06c401)
limestone powder quarry by-product	18.6	3.8	2	57.8	3.6		0.2		0.9	0.1		2.79		136.2	10	30	0	36	0	1.51	50	10	204			Characterization of Quarry By-Products as a Partial Replacement of Cement in Cementitious Composites (https://vtechworks.lib.vt.edu/items/ac593385-ee07-4489-a031-2bc72c06c401)
granite powder quarry by-product	55.8	15.3	11.7	9.1	8		1		0.7	2.3		2.94		24.3	10	30	0	36	0	1.51	50	10	124			Characterization of Quarry By-Products as a Partial Replacement of Cement in Cementitious Composites (https://vtechworks.lib.vt.edu/items/ac593385-ee07-4489-a031-2bc72c06c401)
granite powder quarry by-product	71.7	13.6	4.1	2.8	1.8		0.7		3.9	2.8		2.73		1060	10	30	0	36	0	1.51	50	10	278			Characterization of Quarry By-Products as a Partial Replacement of Cement in Cementitious Composites (https://vtechworks.lib.vt.edu/items/ac593385-ee07-4489-a031-2bc72c06c401)
Greenstone powder quarry by-product	43.2	10.1	13.8	6.5	4.2		2.2		1.4	2		2.93		1240	10	30	0	36	0	1.51	50	10	252			Characterization of Quarry By-Products as a Partial Replacement of Cement in Cementitious Composites (https://vtechworks.lib.vt.edu/items/ac593385-ee07-4489-a031-2bc72c06c401)
limestone powder quarry by-product	24	6.2	2.8	51	4		0.4		1.4	0.2		2.75		1536	10	30	0	36	0	1.51	50	10	189			Characterization of Quarry By-Products as a Partial Replacement of Cement in Cementitious Composites (https://vtechworks.lib.vt.edu/items/ac593385-ee07-4489-a031-2bc72c06c401)
granite powder quarry by-product	75.3	13.2	2.1	1.7	0.4		0.3		4.6	3.2		2.66		933	10	30	0	36	0	1.51	50	10	138			Characterization of Quarry By-Products as a Partial Replacement of Cement in Cementitious Composites (https://vtechworks.lib.vt.edu/items/ac593385-ee07-4489-a031-2bc72c06c401)
quartz Q	98.7	0.7	0	0.13	0.1	0.1				0.1	0.1				10	30	5	52.704	1.08	0.216	40	7		26.4838		Reactivity and Reactivity Tests for Unconventional Fly Ashes, Ying Wang (https://scholarship.miami.edu/esploro/outputs/doctoral/Reactivity-and-Reactivity-Tests-for-Unconventional/991031745320602976)
Class F fly ash FFA11	41.9	20.1	20.2	5	0.7	0.6				1.7	4.6				10	30	5	52.704	1.08	0.216	40	7		26.9327		Reactivity and Reactivity Tests for Unconventional Fly Ashes, Ying Wang (https://scholarship.miami.edu/esploro/outputs/doctoral/Reactivity-and-Reactivity-Tests-for-Unconventional/991031745320602976)
quartz Q	98.7	0.7	0	0.13	0.1	0.1				0.1	0.1				10	30	5	52.704	1.08	0.216	40	7		28.2793		Reactivity and Reactivity Tests for Unconventional Fly Ashes, Ying Wang (https://scholarship.miami.edu/esploro/outputs/doctoral/Reactivity-and-Reactivity-Tests-for-Unconventional/991031745320602976)
Class F fly ash FFA13	54.8	27.6	9.6	1.5	1	0.1				1.9	0.1				10	30	5	52.704	1.08	0.216	40	7		31.8703		Reactivity and Reactivity Tests for Unconventional Fly Ashes, Ying Wang (https://scholarship.miami.edu/esploro/outputs/doctoral/Reactivity-and-Reactivity-Tests-for-Unconventional/991031745320602976)
class c fly ash CFA3	31.2	15.2	3.6	25.3	7.5	2.8				1.9	0.8				10	30	5	52.704	1.08	0.216	40	7		37.2569		Reactivity and Reactivity Tests for Unconventional Fly Ashes, Ying Wang (https://scholarship.miami.edu/esploro/outputs/doctoral/Reactivity-and-Reactivity-Tests-for-Unconventional/991031745320602976)
class c fly ash CFA3	31.2	15.2	3.6	25.3	7.5	2.8				1.9	0.8				10	30	5	52.704	1.08	0.216	40	7		37.7057		Reactivity and Reactivity Tests for Unconventional Fly Ashes, Ying Wang (https://scholarship.miami.edu/esploro/outputs/doctoral/Reactivity-and-Reactivity-Tests-for-Unconventional/991031745320602976)
quartz Q	98.7	0.7	0	0.13	0.1	0.1				0.1	0.1				10	30	0	36	0	1.51	50	7		38.6035		Reactivity and Reactivity Tests for Unconventional Fly Ashes, Ying Wang (https://scholarship.miami.edu/esploro/outputs/doctoral/Reactivity-and-Reactivity-Tests-for-Unconventional/991031745320602976)
class c fly ash CFA3	31.2	15.2	3.6	25.3	7.5	2.8				1.9	0.8				10	30	0	36	0	1.51	50	7		39.5012		Reactivity and Reactivity Tests for Unconventional Fly Ashes, Ying Wang (https://scholarship.miami.edu/esploro/outputs/doctoral/Reactivity-and-Reactivity-Tests-for-Unconventional/991031745320602976)
quartz Q	98.7	0.7	0	0.13	0.1	0.1				0.1	0.1				10	30	0	36	0	1.51	50	7		40.399		Reactivity and Reactivity Tests for Unconventional Fly Ashes, Ying Wang (https://scholarship.miami.edu/esploro/outputs/doctoral/Reactivity-and-Reactivity-Tests-for-Unconventional/991031745320602976)
Class F fly ash FFA13	54.8	27.6	9.6	1.5	1	0.1				1.9	0.1				10	30	5	52.704	1.08	0.216	40	7		43.0923		Reactivity and Reactivity Tests for Unconventional Fly Ashes, Ying Wang (https://scholarship.miami.edu/esploro/outputs/doctoral/Reactivity-and-Reactivity-Tests-for-Unconventional/991031745320602976)
Class F fly ash FFA11	41.9	20.1	20.2	5	0.7	0.6				1.7	4.6				10	30	0	36	0	1.51	50	7		43.5411		Reactivity and Reactivity Tests for Unconventional Fly Ashes, Ying Wang (https://scholarship.miami.edu/esploro/outputs/doctoral/Reactivity-and-Reactivity-Tests-for-Unconventional/991031745320602976)
Class F fly ash FFA11	41.9	20.1	20.2	5	0.7	0.6				1.7	4.6				10	30	5	52.704	1.08	0.216	40	7		44.4389		Reactivity and Reactivity Tests for Unconventional Fly Ashes, Ying Wang (https://scholarship.miami.edu/esploro/outputs/doctoral/Reactivity-and-Reactivity-Tests-for-Unconventional/991031745320602976)
Class F fly ash FFA12	52.2	29.1	9.2	2.2	1.1	0.1				2.2	0.5				10	30	5	52.704	1.08	0.216	40	7		44.4389		Reactivity and Reactivity Tests for Unconventional Fly Ashes, Ying Wang (https://scholarship.miami.edu/esploro/outputs/doctoral/Reactivity-and-Reactivity-Tests-for-Unconventional/991031745320602976)
class c fly ash CFA3	31.2	15.2	3.6	25.3	7.5	2.8				1.9	0.8				10	30	0	36	0	1.51	50	7		48.4788		Reactivity and Reactivity Tests for Unconventional Fly Ashes, Ying Wang (https://scholarship.miami.edu/esploro/outputs/doctoral/Reactivity-and-Reactivity-Tests-for-Unconventional/991031745320602976)
Class F fly ash FFA13	54.8	27.6	9.6	1.5	1	0.1				1.9	0.1				10	30	0	36	0	1.51	50	7		49.8254		Reactivity and Reactivity Tests for Unconventional Fly Ashes, Ying Wang (https://scholarship.miami.edu/esploro/outputs/doctoral/Reactivity-and-Reactivity-Tests-for-Unconventional/991031745320602976)
slag SL	34.8	11.7	0.9	42.6	6.9	1.9				0.4	1.6				10	30	5	52.704	1.08	0.216	40	7		53.8653		Reactivity and Reactivity Tests for Unconventional Fly Ashes, Ying Wang (https://scholarship.miami.edu/esploro/outputs/doctoral/Reactivity-and-Reactivity-Tests-for-Unconventional/991031745320602976)
slag SL	34.8	11.7	0.9	42.6	6.9	1.9				0.4	1.6				10	30	5	52.704	1.08	0.216	40	7		53.8653		Reactivity and Reactivity Tests for Unconventional Fly Ashes, Ying Wang (https://scholarship.miami.edu/esploro/outputs/doctoral/Reactivity-and-Reactivity-Tests-for-Unconventional/991031745320602976)
class c fly ash CFAI	46.1	16.6	3	18.5	2.3	4.1				1.1	0.7				10	30	5	52.704	1.08	0.216	40	7		53.8653		Reactivity and Reactivity Tests for Unconventional Fly Ashes, Ying Wang (https://scholarship.miami.edu/esploro/outputs/doctoral/Reactivity-and-Reactivity-Tests-for-Unconventional/991031745320602976)
Class F fly ash FFA12	52.2	29.1	9.2	2.2	1.1	0.1				2.2	0.5				10	30	5	52.704	1.08	0.216	40	7		56.1097		Reactivity and Reactivity Tests for Unconventional Fly Ashes, Ying Wang (https://scholarship.miami.edu/esploro/outputs/doctoral/Reactivity-and-Reactivity-Tests-for-Unconventional/991031745320602976)
Class F fly ash FFA12	52.2	29.1	9.2	2.2	1.1	0.1				2.2	0.5				10	30	0	36	0	1.51	50	7		56.1097		Reactivity and Reactivity Tests for Unconventional Fly Ashes, Ying Wang (https://scholarship.miami.edu/esploro/outputs/doctoral/Reactivity-and-Reactivity-Tests-for-Unconventional/991031745320602976)
slag SL	34.8	11.7	0.9	42.6	6.9	1.9				0.4	1.6				10	30	0	36	0	1.51	50	7		57.0075		Reactivity and Reactivity Tests for Unconventional Fly Ashes, Ying Wang (https://scholarship.miami.edu/esploro/outputs/doctoral/Reactivity-and-Reactivity-Tests-for-Unconventional/991031745320602976)
class c fly ash CFAI	46.1	16.6	3	18.5	2.3	4.1				1.1	0.7				10	30	5	52.704	1.08	0.216	40	7		61.0474		Reactivity and Reactivity Tests for Unconventional Fly Ashes, Ying Wang (https://scholarship.miami.edu/esploro/outputs/doctoral/Reactivity-and-Reactivity-Tests-for-Unconventional/991031745320602976)
class c fly ash CFAI	46.1	16.6	3	18.5	2.3	4.1				1.1	0.7				10	30	0	36	0	1.51	50	7		61.4963		Reactivity and Reactivity Tests for Unconventional Fly Ashes, Ying Wang (https://scholarship.miami.edu/esploro/outputs/doctoral/Reactivity-and-Reactivity-Tests-for-Unconventional/991031745320602976)
Class F fly ash FFA13	54.8	27.6	9.6	1.5	1	0.1				1.9	0.1				10	30	0	36	0	1.51	50	7		63.2918		Reactivity and Reactivity Tests for Unconventional Fly Ashes, Ying Wang (https://scholarship.miami.edu/esploro/outputs/doctoral/Reactivity-and-Reactivity-Tests-for-Unconventional/991031745320602976)
class c fly ash CFAI	46.1	16.6	3	18.5	2.3	4.1				1.1	0.7				10	30	0	36	0	1.51	50	7		63.7406		Reactivity and Reactivity Tests for Unconventional Fly Ashes, Ying Wang (https://scholarship.miami.edu/esploro/outputs/doctoral/Reactivity-and-Reactivity-Tests-for-Unconventional/991031745320602976)
slag SL	34.8	11.7	0.9	42.6	6.9	1.9				0.4	1.6				10	30	0	36	0	1.51	50	7		65.985		Reactivity and Reactivity Tests for Unconventional Fly Ashes, Ying Wang (https://scholarship.miami.edu/esploro/outputs/doctoral/Reactivity-and-Reactivity-Tests-for-Unconventional/991031745320602976)
Class F fly ash FFA11	41.9	20.1	20.2	5	0.7	0.6				1.7	4.6				10	30	0	36	0	1.51	50	7		68.6783		Reactivity and Reactivity Tests for Unconventional Fly Ashes, Ying Wang (https://scholarship.miami.edu/esploro/outputs/doctoral/Reactivity-and-Reactivity-Tests-for-Unconventional/991031745320602976)
Class F fly ash FFA12	52.2	29.1	9.2	2.2	1.1	0.1				2.2	0.5				10	30	0	36	0	1.51	50	7		81.2469		Reactivity and Reactivity Tests for Unconventional Fly Ashes, Ying Wang (https://scholarship.miami.edu/esploro/outputs/doctoral/Reactivity-and-Reactivity-Tests-for-Unconventional/991031745320602976)
calcined clay CC	47.7	42	2.4	0.4	0.1	0.1				0.3	3				10	30	5	52.704	1.08	0.216	40	7		114.913		Reactivity and Reactivity Tests for Unconventional Fly Ashes, Ying Wang (https://scholarship.miami.edu/esploro/outputs/doctoral/Reactivity-and-Reactivity-Tests-for-Unconventional/991031745320602976)
calcined clay CC	47.7	42	2.4	0.4	0.1	0.1				0.3	3				10	30	0	36	0	1.51	40	7		121.197		Reactivity and Reactivity Tests for Unconventional Fly Ashes, Ying Wang (https://scholarship.miami.edu/esploro/outputs/doctoral/Reactivity-and-Reactivity-Tests-for-Unconventional/991031745320602976)
calcined clay CC	47.7	42	2.4	0.4	0.1	0.1				0.3	3				10	30	0	36	0	1.51	50	7		131.521		Reactivity and Reactivity Tests for Unconventional Fly Ashes, Ying Wang (https://scholarship.miami.edu/esploro/outputs/doctoral/Reactivity-and-Reactivity-Tests-for-Unconventional/991031745320602976)
calcined clay CC	47.7	42	2.4	0.4	0.1	0.1				0.3	3				10	30	5	52.704	1.08	0.216	40	7		139.152		Reactivity and Reactivity Tests for Unconventional Fly Ashes, Ying Wang (https://scholarship.miami.edu/esploro/outputs/doctoral/Reactivity-and-Reactivity-Tests-for-Unconventional/991031745320602976)
silica fume SF	91.6	0.5	0	3.4	0.3	0				0.6					10	30	0	36	0	1.51	50	7		144.539		Reactivity and Reactivity Tests for Unconventional Fly Ashes, Ying Wang (https://scholarship.miami.edu/esploro/outputs/doctoral/Reactivity-and-Reactivity-Tests-for-Unconventional/991031745320602976)
silica fume SF	91.6	0.5	0	3.4	0.3	0				0.6					10	30	0	36	0	1.51	50	7		156.209		Reactivity and Reactivity Tests for Unconventional Fly Ashes, Ying Wang (https://scholarship.miami.edu/esploro/outputs/doctoral/Reactivity-and-Reactivity-Tests-for-Unconventional/991031745320602976)
silica fume SF	91.6	0.5	0	3.4	0.3	0				0.6					10	30	5	52.704	1.08	0.216	40	7		158.454		Reactivity and Reactivity Tests for Unconventional Fly Ashes, Ying Wang (https://scholarship.miami.edu/esploro/outputs/doctoral/Reactivity-and-Reactivity-Tests-for-Unconventional/991031745320602976)
silica fume SF	91.6	0.5	0	3.4	0.3	0				0.6					10	30	5	52.704	1.08	0.216	40	7		162.494		Reactivity and Reactivity Tests for Unconventional Fly Ashes, Ying Wang (https://scholarship.miami.edu/esploro/outputs/doctoral/Reactivity-and-Reactivity-Tests-for-Unconventional/991031745320602976)
calcined clay CC	47.7	42	2.4	0.4	0.1	0.1				0.3	3				10	30	5	52.704	1.08	0.216	40	7	575.318			Reactivity and Reactivity Tests for Unconventional Fly Ashes, Ying Wang (https://scholarship.miami.edu/esploro/outputs/doctoral/Reactivity-and-Reactivity-Tests-for-Unconventional/991031745320602976)
slag SL	34.8	11.7	0.9	42.6	6.9	1.9				0.4	1.6				10	30	5	52.704	1.08	0.216	40	7	589.567			Reactivity and Reactivity Tests for Unconventional Fly Ashes, Ying Wang (https://scholarship.miami.edu/esploro/outputs/doctoral/Reactivity-and-Reactivity-Tests-for-Unconventional/991031745320602976)
silica fume SF	91.6	0.5	0	3.4	0.3	0				0.6					10	30	5	52.704	1.08	0.216	40	7	514.758			Reactivity and Reactivity Tests for Unconventional Fly Ashes, Ying Wang (https://scholarship.miami.edu/esploro/outputs/doctoral/Reactivity-and-Reactivity-Tests-for-Unconventional/991031745320602976)
class c fly ash CFAI	46.1	16.6	3	18.5	2.3	4.1				1.1	0.7				10	30	5	52.704	1.08	0.216	40	7	420.356			Reactivity and Reactivity Tests for Unconventional Fly Ashes, Ying Wang (https://scholarship.miami.edu/esploro/outputs/doctoral/Reactivity-and-Reactivity-Tests-for-Unconventional/991031745320602976)
class c fly ash CFA3	31.2	15.2	3.6	25.3	7.5	2.8				1.9	0.8				10	30	5	52.704	1.08	0.216	40	7	413.232			Reactivity and Reactivity Tests for Unconventional Fly Ashes, Ying Wang (https://scholarship.miami.edu/esploro/outputs/doctoral/Reactivity-and-Reactivity-Tests-for-Unconventional/991031745320602976)
Class F fly ash FFA11	41.9	20.1	20.2	5	0.7	0.6				1.7	4.6				10	30	5	52.704	1.08	0.216	40	7	156.743			Reactivity and Reactivity Tests for Unconventional Fly Ashes, Ying Wang (https://scholarship.miami.edu/esploro/outputs/doctoral/Reactivity-and-Reactivity-Tests-for-Unconventional/991031745320602976)
Class F fly ash FFA12	52.2	29.1	9.2	2.2	1.1	0.1				2.2	0.5				10	30	5	52.704	1.08	0.216	40	7	151.399			Reactivity and Reactivity Tests for Unconventional Fly Ashes, Ying Wang (https://scholarship.miami.edu/esploro/outputs/doctoral/Reactivity-and-Reactivity-Tests-for-Unconventional/991031745320602976)
Class F fly ash FFA13	54.8	27.6	9.6	1.5	1	0.1				1.9	0.1				10	30	5	52.704	1.08	0.216	40	7	74.8092			Reactivity and Reactivity Tests for Unconventional Fly Ashes, Ying Wang (https://scholarship.miami.edu/esploro/outputs/doctoral/Reactivity-and-Reactivity-Tests-for-Unconventional/991031745320602976)
quartz Q	98.7	0.7	0	0.13	0.1	0.1				0.1	0.1				10	30	5	52.704	1.08	0.216	40	7	21.374			Reactivity and Reactivity Tests for Unconventional Fly Ashes, Ying Wang (https://scholarship.miami.edu/esploro/outputs/doctoral/Reactivity-and-Reactivity-Tests-for-Unconventional/991031745320602976)
calcined clay CC	47.7	42	2.4	0.4	0.1	0.1				0.3	3				10	30	0	36	0	1.51	50	7	618.066			Reactivity and Reactivity Tests for Unconventional Fly Ashes, Ying Wang (https://scholarship.miami.edu/esploro/outputs/doctoral/Reactivity-and-Reactivity-Tests-for-Unconventional/991031745320602976)
slag SL	34.8	11.7	0.9	42.6	6.9	1.9				0.4	1.6				10	30	0	36	0	1.51	50	7	602.036			Reactivity and Reactivity Tests for Unconventional Fly Ashes, Ying Wang (https://scholarship.miami.edu/esploro/outputs/doctoral/Reactivity-and-Reactivity-Tests-for-Unconventional/991031745320602976)
silica fume SF	91.6	0.5	0	3.4	0.3	0				0.6					10	30	0	36	0	1.51	50	7	545.038			Reactivity and Reactivity Tests for Unconventional Fly Ashes, Ying Wang (https://scholarship.miami.edu/esploro/outputs/doctoral/Reactivity-and-Reactivity-Tests-for-Unconventional/991031745320602976)
class c fly ash CFAI	46.1	16.6	3	18.5	2.3	4.1				1.1	0.7				10	30	0	36	0	1.51	50	7	409.669			Reactivity and Reactivity Tests for Unconventional Fly Ashes, Ying Wang (https://scholarship.miami.edu/esploro/outputs/doctoral/Reactivity-and-Reactivity-Tests-for-Unconventional/991031745320602976)
class c fly ash CFA3	31.2	15.2	3.6	25.3	7.5	2.8				1.9	0.8				10	30	0	36	0	1.51	50	7	390.076			Reactivity and Reactivity Tests for Unconventional Fly Ashes, Ying Wang (https://scholarship.miami.edu/esploro/outputs/doctoral/Reactivity-and-Reactivity-Tests-for-Unconventional/991031745320602976)
Class F fly ash FFA11	41.9	20.1	20.2	5	0.7	0.6				1.7	4.6				10	30	0	36	0	1.51	50	7	311.705			Reactivity and Reactivity Tests for Unconventional Fly Ashes, Ying Wang (https://scholarship.miami.edu/esploro/outputs/doctoral/Reactivity-and-Reactivity-Tests-for-Unconventional/991031745320602976)
Class F fly ash FFA12	52.2	29.1	9.2	2.2	1.1	0.1				2.2	0.5				10	30	0	36	0	1.51	50	7	313.486			Reactivity and Reactivity Tests for Unconventional Fly Ashes, Ying Wang (https://scholarship.miami.edu/esploro/outputs/doctoral/Reactivity-and-Reactivity-Tests-for-Unconventional/991031745320602976)
Class F fly ash FFA13	54.8	27.6	9.6	1.5	1	0.1				1.9	0.1				10	30	0	36	0	1.51	50	7	240.458			Reactivity and Reactivity Tests for Unconventional Fly Ashes, Ying Wang (https://scholarship.miami.edu/esploro/outputs/doctoral/Reactivity-and-Reactivity-Tests-for-Unconventional/991031745320602976)
quartz Q	98.7	0.7	0	0.13	0.1	0.1				0.1	0.1				10	30	0	36	0	1.51	50	7	53.4351			Reactivity and Reactivity Tests for Unconventional Fly Ashes, Ying Wang (https://scholarship.miami.edu/esploro/outputs/doctoral/Reactivity-and-Reactivity-Tests-for-Unconventional/991031745320602976)
calcined clay CC	47.7	42	2.4	0.4	0.1	0.1				0.3	3				10	30	5	52.704	1.08	0.216	40	7	502.29			Reactivity and Reactivity Tests for Unconventional Fly Ashes, Ying Wang (https://scholarship.miami.edu/esploro/outputs/doctoral/Reactivity-and-Reactivity-Tests-for-Unconventional/991031745320602976)
slag SL	34.8	11.7	0.9	42.6	6.9	1.9				0.4	1.6				10	30	5	52.704	1.08	0.216	40	7	447.074			Reactivity and Reactivity Tests for Unconventional Fly Ashes, Ying Wang (https://scholarship.miami.edu/esploro/outputs/doctoral/Reactivity-and-Reactivity-Tests-for-Unconventional/991031745320602976)
silica fume SF	91.6	0.5	0	3.4	0.3	0				0.6					10	30	5	52.704	1.08	0.216	40	7	539.695			Reactivity and Reactivity Tests for Unconventional Fly Ashes, Ying Wang (https://scholarship.miami.edu/esploro/outputs/doctoral/Reactivity-and-Reactivity-Tests-for-Unconventional/991031745320602976)
class c fly ash CFAI	46.1	16.6	3	18.5	2.3	4.1				1.1	0.7				10	30	5	52.704	1.08	0.216	40	7	304.58			Reactivity and Reactivity Tests for Unconventional Fly Ashes, Ying Wang (https://scholarship.miami.edu/esploro/outputs/doctoral/Reactivity-and-Reactivity-Tests-for-Unconventional/991031745320602976)
class c fly ash CFA3	31.2	15.2	3.6	25.3	7.5	2.8				1.9	0.8				10	30	5	52.704	1.08	0.216	40	7	324.173			Reactivity and Reactivity Tests for Unconventional Fly Ashes, Ying Wang (https://scholarship.miami.edu/esploro/outputs/doctoral/Reactivity-and-Reactivity-Tests-for-Unconventional/991031745320602976)
Class F fly ash FFA11	41.9	20.1	20.2	5	0.7	0.6				1.7	4.6				10	30	5	52.704	1.08	0.216	40	7	147.837			Reactivity and Reactivity Tests for Unconventional Fly Ashes, Ying Wang (https://scholarship.miami.edu/esploro/outputs/doctoral/Reactivity-and-Reactivity-Tests-for-Unconventional/991031745320602976)
Class F fly ash FFA12	52.2	29.1	9.2	2.2	1.1	0.1				2.2	0.5				10	30	5	52.704	1.08	0.216	40	7	133.588			Reactivity and Reactivity Tests for Unconventional Fly Ashes, Ying Wang (https://scholarship.miami.edu/esploro/outputs/doctoral/Reactivity-and-Reactivity-Tests-for-Unconventional/991031745320602976)
Class F fly ash FFA13	54.8	27.6	9.6	1.5	1	0.1				1.9	0.1				10	30	5	52.704	1.08	0.216	40	7	85.4962			Reactivity and Reactivity Tests for Unconventional Fly Ashes, Ying Wang (https://scholarship.miami.edu/esploro/outputs/doctoral/Reactivity-and-Reactivity-Tests-for-Unconventional/991031745320602976)
quartz Q	98.7	0.7	0	0.13	0.1	0.1				0.1	0.1				10	30	5	52.704	1.08	0.216	40	7	12.4682			Reactivity and Reactivity Tests for Unconventional Fly Ashes, Ying Wang (https://scholarship.miami.edu/esploro/outputs/doctoral/Reactivity-and-Reactivity-Tests-for-Unconventional/991031745320602976)
calcined clay CC	47.7	42	2.4	0.4	0.1	0.1				0.3	3				10	30	0	36	0	1.51	40	7	575.318			Reactivity and Reactivity Tests for Unconventional Fly Ashes, Ying Wang (https://scholarship.miami.edu/esploro/outputs/doctoral/Reactivity-and-Reactivity-Tests-for-Unconventional/991031745320602976)
slag SL	34.8	11.7	0.9	42.6	6.9	1.9				0.4	1.6				10	30	0	36	0	1.51	50	7	530.789			Reactivity and Reactivity Tests for Unconventional Fly Ashes, Ying Wang (https://scholarship.miami.edu/esploro/outputs/doctoral/Reactivity-and-Reactivity-Tests-for-Unconventional/991031745320602976)
silica fume SF	91.6	0.5	0	3.4	0.3	0				0.6					10	30	0	36	0	1.51	50	7	575.318			Reactivity and Reactivity Tests for Unconventional Fly Ashes, Ying Wang (https://scholarship.miami.edu/esploro/outputs/doctoral/Reactivity-and-Reactivity-Tests-for-Unconventional/991031745320602976)
class c fly ash CFAI	46.1	16.6	3	18.5	2.3	4.1				1.1	0.7				10	30	0	36	0	1.51	50	7	317.048			Reactivity and Reactivity Tests for Unconventional Fly Ashes, Ying Wang (https://scholarship.miami.edu/esploro/outputs/doctoral/Reactivity-and-Reactivity-Tests-for-Unconventional/991031745320602976)
class c fly ash CFA3	31.2	15.2	3.6	25.3	7.5	2.8				1.9	0.8				10	30	0	36	0	1.51	50	7	277.863			Reactivity and Reactivity Tests for Unconventional Fly Ashes, Ying Wang (https://scholarship.miami.edu/esploro/outputs/doctoral/Reactivity-and-Reactivity-Tests-for-Unconventional/991031745320602976)
Class F fly ash FFA11	41.9	20.1	20.2	5	0.7	0.6				1.7	4.6				10	30	0	36	0	1.51	50	7	288.55			Reactivity and Reactivity Tests for Unconventional Fly Ashes, Ying Wang (https://scholarship.miami.edu/esploro/outputs/doctoral/Reactivity-and-Reactivity-Tests-for-Unconventional/991031745320602976)
Class F fly ash FFA12	52.2	29.1	9.2	2.2	1.1	0.1				2.2	0.5				10	30	0	36	0	1.51	50	7	260.051			Reactivity and Reactivity Tests for Unconventional Fly Ashes, Ying Wang (https://scholarship.miami.edu/esploro/outputs/doctoral/Reactivity-and-Reactivity-Tests-for-Unconventional/991031745320602976)
Class F fly ash FFA13	54.8	27.6	9.6	1.5	1	0.1				1.9	0.1				10	30	0	36	0	1.51	50	7	206.616			Reactivity and Reactivity Tests for Unconventional Fly Ashes, Ying Wang (https://scholarship.miami.edu/esploro/outputs/doctoral/Reactivity-and-Reactivity-Tests-for-Unconventional/991031745320602976)
quartz Q	98.7	0.7	0	0.13	0.1	0.1				0.1	0.1				10	30	0	36	0	1.51	50	7	35.6234			Reactivity and Reactivity Tests for Unconventional Fly Ashes, Ying Wang (https://scholarship.miami.edu/esploro/outputs/doctoral/Reactivity-and-Reactivity-Tests-for-Unconventional/991031745320602976)
calcined clay CC	47.7	42	2.4	0.4	0.1	0.1				0.3	3				10	30	5	52.704	1.08	0.216	40	7			27.5385	Reactivity and Reactivity Tests for Unconventional Fly Ashes, Ying Wang (https://scholarship.miami.edu/esploro/outputs/doctoral/Reactivity-and-Reactivity-Tests-for-Unconventional/991031745320602976)
slag SL	34.8	11.7	0.9	42.6	6.9	1.9				0.4	1.6				10	30	5	52.704	1.08	0.216	40	7			18.4615	Reactivity and Reactivity Tests for Unconventional Fly Ashes, Ying Wang (https://scholarship.miami.edu/esploro/outputs/doctoral/Reactivity-and-Reactivity-Tests-for-Unconventional/991031745320602976)
silica fume SF	91.6	0.5	0	3.4	0.3	0				0.6					10	30	5	52.704	1.08	0.216	40	7			17.3846	Reactivity and Reactivity Tests for Unconventional Fly Ashes, Ying Wang (https://scholarship.miami.edu/esploro/outputs/doctoral/Reactivity-and-Reactivity-Tests-for-Unconventional/991031745320602976)
class c fly ash CFAI	46.1	16.6	3	18.5	2.3	4.1				1.1	0.7				10	30	5	52.704	1.08	0.216	40	7			16.0769	Reactivity and Reactivity Tests for Unconventional Fly Ashes, Ying Wang (https://scholarship.miami.edu/esploro/outputs/doctoral/Reactivity-and-Reactivity-Tests-for-Unconventional/991031745320602976)
class c fly ash CFA3	31.2	15.2	3.6	25.3	7.5	2.8				1.9	0.8				10	30	5	52.704	1.08	0.216	40	7			18.0769	Reactivity and Reactivity Tests for Unconventional Fly Ashes, Ying Wang (https://scholarship.miami.edu/esploro/outputs/doctoral/Reactivity-and-Reactivity-Tests-for-Unconventional/991031745320602976)
Class F fly ash FFA11	41.9	20.1	20.2	5	0.7	0.6				1.7	4.6				10	30	5	52.704	1.08	0.216	40	7			7.30769	Reactivity and Reactivity Tests for Unconventional Fly Ashes, Ying Wang (https://scholarship.miami.edu/esploro/outputs/doctoral/Reactivity-and-Reactivity-Tests-for-Unconventional/991031745320602976)
Class F fly ash FFA12	52.2	29.1	9.2	2.2	1.1	0.1				2.2	0.5				10	30	5	52.704	1.08	0.216	40	7			7.61538	Reactivity and Reactivity Tests for Unconventional Fly Ashes, Ying Wang (https://scholarship.miami.edu/esploro/outputs/doctoral/Reactivity-and-Reactivity-Tests-for-Unconventional/991031745320602976)
Class F fly ash FFA13	54.8	27.6	9.6	1.5	1	0.1				1.9	0.1				10	30	5	52.704	1.08	0.216	40	7			5.61538	Reactivity and Reactivity Tests for Unconventional Fly Ashes, Ying Wang (https://scholarship.miami.edu/esploro/outputs/doctoral/Reactivity-and-Reactivity-Tests-for-Unconventional/991031745320602976)
quartz Q	98.7	0.7	0	0.13	0.1	0.1				0.1	0.1				10	30	5	52.704	1.08	0.216	40	7			4.76923	Reactivity and Reactivity Tests for Unconventional Fly Ashes, Ying Wang (https://scholarship.miami.edu/esploro/outputs/doctoral/Reactivity-and-Reactivity-Tests-for-Unconventional/991031745320602976)
calcined clay CC	47.7	42	2.4	0.4	0.1	0.1				0.3	3				10	30	0	36	0	1.51	50	7			28.1538	Reactivity and Reactivity Tests for Unconventional Fly Ashes, Ying Wang (https://scholarship.miami.edu/esploro/outputs/doctoral/Reactivity-and-Reactivity-Tests-for-Unconventional/991031745320602976)
slag SL	34.8	11.7	0.9	42.6	6.9	1.9				0.4	1.6				10	30	0	36	0	1.51	50	7			18.8462	Reactivity and Reactivity Tests for Unconventional Fly Ashes, Ying Wang (https://scholarship.miami.edu/esploro/outputs/doctoral/Reactivity-and-Reactivity-Tests-for-Unconventional/991031745320602976)
silica fume SF	91.6	0.5	0	3.4	0.3	0				0.6					10	30	0	36	0	1.51	50	7			17.8462	Reactivity and Reactivity Tests for Unconventional Fly Ashes, Ying Wang (https://scholarship.miami.edu/esploro/outputs/doctoral/Reactivity-and-Reactivity-Tests-for-Unconventional/991031745320602976)
class c fly ash CFAI	46.1	16.6	3	18.5	2.3	4.1				1.1	0.7				10	30	0	36	0	1.51	50	7			16.4615	Reactivity and Reactivity Tests for Unconventional Fly Ashes, Ying Wang (https://scholarship.miami.edu/esploro/outputs/doctoral/Reactivity-and-Reactivity-Tests-for-Unconventional/991031745320602976)
class c fly ash CFA3	31.2	15.2	3.6	25.3	7.5	2.8				1.9	0.8				10	30	0	36	0	1.51	50	7			18.6154	Reactivity and Reactivity Tests for Unconventional Fly Ashes, Ying Wang (https://scholarship.miami.edu/esploro/outputs/doctoral/Reactivity-and-Reactivity-Tests-for-Unconventional/991031745320602976)
Class F fly ash FFA11	41.9	20.1	20.2	5	0.7	0.6				1.7	4.6				10	30	0	36	0	1.51	50	7			12.8462	Reactivity and Reactivity Tests for Unconventional Fly Ashes, Ying Wang (https://scholarship.miami.edu/esploro/outputs/doctoral/Reactivity-and-Reactivity-Tests-for-Unconventional/991031745320602976)
Class F fly ash FFA12	52.2	29.1	9.2	2.2	1.1	0.1				2.2	0.5				10	30	0	36	0	1.51	50	7			12.3846	Reactivity and Reactivity Tests for Unconventional Fly Ashes, Ying Wang (https://scholarship.miami.edu/esploro/outputs/doctoral/Reactivity-and-Reactivity-Tests-for-Unconventional/991031745320602976)
Class F fly ash FFA13	54.8	27.6	9.6	1.5	1	0.1				1.9	0.1				10	30	0	36	0	1.51	50	7			10.3077	Reactivity and Reactivity Tests for Unconventional Fly Ashes, Ying Wang (https://scholarship.miami.edu/esploro/outputs/doctoral/Reactivity-and-Reactivity-Tests-for-Unconventional/991031745320602976)
quartz Q	98.7	0.7	0	0.13	0.1	0.1				0.1	0.1				10	30	0	36	0	1.51	50	7			3.76923	Reactivity and Reactivity Tests for Unconventional Fly Ashes, Ying Wang (https://scholarship.miami.edu/esploro/outputs/doctoral/Reactivity-and-Reactivity-Tests-for-Unconventional/991031745320602976)
calcined clay CC	47.7	42	2.4	0.4	0.1	0.1				0.3	3				10	30	5	52.704	1.08	0.216	40	7			21	Reactivity and Reactivity Tests for Unconventional Fly Ashes, Ying Wang (https://scholarship.miami.edu/esploro/outputs/doctoral/Reactivity-and-Reactivity-Tests-for-Unconventional/991031745320602976)
slag SL	34.8	11.7	0.9	42.6	6.9	1.9				0.4	1.6				10	30	5	52.704	1.08	0.216	40	7			16.3077	Reactivity and Reactivity Tests for Unconventional Fly Ashes, Ying Wang (https://scholarship.miami.edu/esploro/outputs/doctoral/Reactivity-and-Reactivity-Tests-for-Unconventional/991031745320602976)
silica fume SF	91.6	0.5	0	3.4	0.3	0				0.6					10	30	5	52.704	1.08	0.216	40	7			18.3846	Reactivity and Reactivity Tests for Unconventional Fly Ashes, Ying Wang (https://scholarship.miami.edu/esploro/outputs/doctoral/Reactivity-and-Reactivity-Tests-for-Unconventional/991031745320602976)
class c fly ash CFAI	46.1	16.6	3	18.5	2.3	4.1				1.1	0.7				10	30	5	52.704	1.08	0.216	40	7			14.3846	Reactivity and Reactivity Tests for Unconventional Fly Ashes, Ying Wang (https://scholarship.miami.edu/esploro/outputs/doctoral/Reactivity-and-Reactivity-Tests-for-Unconventional/991031745320602976)
class c fly ash CFA3	31.2	15.2	3.6	25.3	7.5	2.8				1.9	0.8				10	30	5	52.704	1.08	0.216	40	7			17.2308	Reactivity and Reactivity Tests for Unconventional Fly Ashes, Ying Wang (https://scholarship.miami.edu/esploro/outputs/doctoral/Reactivity-and-Reactivity-Tests-for-Unconventional/991031745320602976)
Class F fly ash FFA11	41.9	20.1	20.2	5	0.7	0.6				1.7	4.6				10	30	5	52.704	1.08	0.216	40	7			8.15385	Reactivity and Reactivity Tests for Unconventional Fly Ashes, Ying Wang (https://scholarship.miami.edu/esploro/outputs/doctoral/Reactivity-and-Reactivity-Tests-for-Unconventional/991031745320602976)
Class F fly ash FFA12	52.2	29.1	9.2	2.2	1.1	0.1				2.2	0.5				10	30	5	52.704	1.08	0.216	40	7			7.76923	Reactivity and Reactivity Tests for Unconventional Fly Ashes, Ying Wang (https://scholarship.miami.edu/esploro/outputs/doctoral/Reactivity-and-Reactivity-Tests-for-Unconventional/991031745320602976)
Class F fly ash FFA13	54.8	27.6	9.6	1.5	1	0.1				1.9	0.1				10	30	5	52.704	1.08	0.216	40	7			7	Reactivity and Reactivity Tests for Unconventional Fly Ashes, Ying Wang (https://scholarship.miami.edu/esploro/outputs/doctoral/Reactivity-and-Reactivity-Tests-for-Unconventional/991031745320602976)
quartz Q	98.7	0.7	0	0.13	0.1	0.1				0.1	0.1				10	30	5	52.704	1.08	0.216	40	7			6.15385	Reactivity and Reactivity Tests for Unconventional Fly Ashes, Ying Wang (https://scholarship.miami.edu/esploro/outputs/doctoral/Reactivity-and-Reactivity-Tests-for-Unconventional/991031745320602976)
calcined clay CC	47.7	42	2.4	0.4	0.1	0.1				0.3	3				10	30	0	36	0	1.51	40	7			23.9231	Reactivity and Reactivity Tests for Unconventional Fly Ashes, Ying Wang (https://scholarship.miami.edu/esploro/outputs/doctoral/Reactivity-and-Reactivity-Tests-for-Unconventional/991031745320602976)
slag SL	34.8	11.7	0.9	42.6	6.9	1.9				0.4	1.6				10	30	0	36	0	1.51	50	7			16.4615	Reactivity and Reactivity Tests for Unconventional Fly Ashes, Ying Wang (https://scholarship.miami.edu/esploro/outputs/doctoral/Reactivity-and-Reactivity-Tests-for-Unconventional/991031745320602976)
silica fume SF	91.6	0.5	0	3.4	0.3	0				0.6					10	30	0	36	0	1.51	50	7			19.1538	Reactivity and Reactivity Tests for Unconventional Fly Ashes, Ying Wang (https://scholarship.miami.edu/esploro/outputs/doctoral/Reactivity-and-Reactivity-Tests-for-Unconventional/991031745320602976)
class c fly ash CFAI	46.1	16.6	3	18.5	2.3	4.1				1.1	0.7				10	30	0	36	0	1.51	50	7			17.3846	Reactivity and Reactivity Tests for Unconventional Fly Ashes, Ying Wang (https://scholarship.miami.edu/esploro/outputs/doctoral/Reactivity-and-Reactivity-Tests-for-Unconventional/991031745320602976)
class c fly ash CFA3	31.2	15.2	3.6	25.3	7.5	2.8				1.9	0.8				10	30	0	36	0	1.51	50	7			19.1538	Reactivity and Reactivity Tests for Unconventional Fly Ashes, Ying Wang (https://scholarship.miami.edu/esploro/outputs/doctoral/Reactivity-and-Reactivity-Tests-for-Unconventional/991031745320602976)
Class F fly ash FFA11	41.9	20.1	20.2	5	0.7	0.6				1.7	4.6				10	30	0	36	0	1.51	50	7			13.7692	Reactivity and Reactivity Tests for Unconventional Fly Ashes, Ying Wang (https://scholarship.miami.edu/esploro/outputs/doctoral/Reactivity-and-Reactivity-Tests-for-Unconventional/991031745320602976)
Class F fly ash FFA12	52.2	29.1	9.2	2.2	1.1	0.1				2.2	0.5				10	30	0	36	0	1.51	50	7			12.7692	Reactivity and Reactivity Tests for Unconventional Fly Ashes, Ying Wang (https://scholarship.miami.edu/esploro/outputs/doctoral/Reactivity-and-Reactivity-Tests-for-Unconventional/991031745320602976)
Class F fly ash FFA13	54.8	27.6	9.6	1.5	1	0.1				1.9	0.1				10	30	0	36	0	1.51	50	7			11.0769	Reactivity and Reactivity Tests for Unconventional Fly Ashes, Ying Wang (https://scholarship.miami.edu/esploro/outputs/doctoral/Reactivity-and-Reactivity-Tests-for-Unconventional/991031745320602976)
quartz Q	98.7	0.7	0	0.13	0.1	0.1				0.1	0.1				10	30	0	36	0	1.51	50	7			5.84615	Reactivity and Reactivity Tests for Unconventional Fly Ashes, Ying Wang (https://scholarship.miami.edu/esploro/outputs/doctoral/Reactivity-and-Reactivity-Tests-for-Unconventional/991031745320602976)
calcined clay CSMRB	26.5	7.2	4.51	53.6	2.72	3.45			0.77	0.35	0.9	2.993	53.89	12.6	11	33.33	5.56	60	1.2	0.24	40	7		24		Thermally Treated Cutter Soil Mixing Residue (CSMR) as Construction and Building Materials (https://kuleuven.limo.libis.be/discovery/search?query=any,contains,LIRIAS3937773&tab=LIRIAS&search_scope=lirias_profile&vid=32KUL_KUL:Lirias&offset=0)
calcined clay CSMRC	58.79	6.49	2.65	25.11	1.74	2.65			1.74	0.46	0.8	2.753	43.11	22.4	11	33.33	5.56	60	1.2	0.24	40	7		31.4		Thermally Treated Cutter Soil Mixing Residue (CSMR) as Construction and Building Materials (https://kuleuven.limo.libis.be/discovery/search?query=any,contains,LIRIAS3937773&tab=LIRIAS&search_scope=lirias_profile&vid=32KUL_KUL:Lirias&offset=0)
slag GGBS	38.6	8.4	7.6	31.2	3.3				0.3	0.3				7.9	11	33.33	5.56	60	1.2	0.24	40	7		36		Thermally Treated Cutter Soil Mixing Residue (CSMR) as Construction and Building Materials (https://kuleuven.limo.libis.be/discovery/search?query=any,contains,LIRIAS3937773&tab=LIRIAS&search_scope=lirias_profile&vid=32KUL_KUL:Lirias&offset=0)
calcined clay CSMRA	37.5	9.1	7.29	34.1	2.72	4.26			1.99	0.85	2.8	2.767	47.56	17.8	11	33.33	5.56	60	1.2	0.24	40	7		39.8		Thermally Treated Cutter Soil Mixing Residue (CSMR) as Construction and Building Materials (https://kuleuven.limo.libis.be/discovery/search?query=any,contains,LIRIAS3937773&tab=LIRIAS&search_scope=lirias_profile&vid=32KUL_KUL:Lirias&offset=0)
Fly ash	53.2	27.6	6.5	3.4	0.9	0.9			2	1				3.3	11	33.33	5.56	60	1.2	0.24	40	7		59.8		Thermally Treated Cutter Soil Mixing Residue (CSMR) as Construction and Building Materials (https://kuleuven.limo.libis.be/discovery/search?query=any,contains,LIRIAS3937773&tab=LIRIAS&search_scope=lirias_profile&vid=32KUL_KUL:Lirias&offset=0)
calcined Thermally Treated Cutter Soil Mixing Residue clay CSMRA	37.5	9.1	7.29	34.1	2.72	4.26			1.99	0.85	2.8	2.767	59.22	17.8	11	33.33	5.56	60	1.2	0.24	40	7			5.4	Thermally Treated Cutter Soil Mixing Residue (CSMR) as Construction and Building Materials (https://kuleuven.limo.libis.be/discovery/search?query=any,contains,LIRIAS3937773&tab=LIRIAS&search_scope=lirias_profile&vid=32KUL_KUL:Lirias&offset=0)
calcined Thermally Treated Cutter Soil Mixing Residue clay CSMRB	26.5	7.2	4.51	53.6	2.72	3.45			0.77	0.35	0.9	2.993	54.65	12.6	11	33.33	5.56	60	1.2	0.24	40	7			7.1	Thermally Treated Cutter Soil Mixing Residue (CSMR) as Construction and Building Materials (https://kuleuven.limo.libis.be/discovery/search?query=any,contains,LIRIAS3937773&tab=LIRIAS&search_scope=lirias_profile&vid=32KUL_KUL:Lirias&offset=0)
calcined Thermally Treated Cutter Soil Mixing Residue clay CSMRC	58.79	6.49	2.65	25.11	1.74	2.65			1.74	0.46	0.8	2.753	33.89	22.4	11	33.33	5.56	60	1.2	0.24	40	7			6.5	Thermally Treated Cutter Soil Mixing Residue (CSMR) as Construction and Building Materials (https://kuleuven.limo.libis.be/discovery/search?query=any,contains,LIRIAS3937773&tab=LIRIAS&search_scope=lirias_profile&vid=32KUL_KUL:Lirias&offset=0)
Fly ash	53.2	27.6	6.5	3.4	0.9	0.9			2	1				3.3	11	33.33	5.56	60	1.2	0.24	40	7			5.1	Thermally Treated Cutter Soil Mixing Residue (CSMR) as Construction and Building Materials (https://kuleuven.limo.libis.be/discovery/search?query=any,contains,LIRIAS3937773&tab=LIRIAS&search_scope=lirias_profile&vid=32KUL_KUL:Lirias&offset=0)
slag GGBS	38.6	8.4	7.6	31.2	3.3				0.3	0.3				7.9	11	33.33	5.56	60	1.2	0.24	40	7			7.8	Thermally Treated Cutter Soil Mixing Residue (CSMR) as Construction and Building Materials (https://kuleuven.limo.libis.be/discovery/search?query=any,contains,LIRIAS3937773&tab=LIRIAS&search_scope=lirias_profile&vid=32KUL_KUL:Lirias&offset=0)
